# Supplementary material for: A Prognostic Model of Differentiated Thyroid Cancer Based on Up-Regulated Glycolysis-Related Genes
Source: Front Endocrinol (Lausanne). 2022 Apr 22;13:775278. doi: 10.3389/fendo.2022.775278 (PMC9072639; doi:10.3389/fendo.2022.775278)
Supplement: Supplementary file 11 [file Table_1.xlsx]

## Sheet: Sheet1
Supplemental Table 1. Clinical characteristic of 379 TC patients from TCGA cohort
Characteristics	Number of cases (%)
Age
<55	268(70.7%)
Age	111(29.3%)
Sex
Female	279(73.6%)
Male	100(26.4%)
Histological grade
Classical	264(69.7%)
Follicular	82(21.6%)
Tall cell	24(6.3%)
Other	9(2.4%)
AJCC stage
I	234(61.7%)
II	43(11.4%)
III	74(19.5%)
IV	28(7.4%)
T stage
I	110(29%)
II	140(36.9%)
III	122(32.2%）
IV	6(1.6%)
NA	1(0.3%)
N stage
N0	177(46.7%)
N1	164(43.3%)
NA	38(10%)
M stage
M0	218(57.5%)
M1	4(1.1%)
NA	157(41.4%)
DFS status
Alive	343(90.5%)
Dead	36(9.5%)
DFS time (month)	(1.05,178.15)
median	30.12
Abbreviation: DFS, disease free survival.
