# Supplementary material for: A Prognostic Model of Differentiated Thyroid Cancer Based on Up-Regulated Glycolysis-Related Genes
Source: Front Endocrinol (Lausanne). 2022 Apr 22;13:775278. doi: 10.3389/fendo.2022.775278 (PMC9072639; doi:10.3389/fendo.2022.775278)
Supplement: Supplementary file 12 [file Table_2.xlsx]

## Sheet: Sheet1
Supplemental Table 2. Sample information of GEO datasets
GEO ID	Normal	Tumor
GSE33630	45	49
GSE60542	30	33
GSE58545	18	27
GSE35570	51	65
GSE27155	4	78
