# Supplementary material for: A Prognostic Model of Differentiated Thyroid Cancer Based on Up-Regulated Glycolysis-Related Genes
Source: Front Endocrinol (Lausanne). 2022 Apr 22;13:775278. doi: 10.3389/fendo.2022.775278 (PMC9072639; doi:10.3389/fendo.2022.775278)
Supplement: Supplementary file 13 [file Table_3.xlsx]

## Sheet: Supplemental Table 2
Supplemental Table 3. The list of glycolysis-related genes in GeneCards database
Gene Symbol	Description	Category	Gifts	GC Id	Relevance score	GeneCards Link
PKM	Pyruvate Kinase M1/2	Protein Coding	46	GC15M072199	25.1988	https://www.genecards.org/cgi-bin/carddisp.pl?gene=PKM
HK2	Hexokinase 2	Protein Coding	49	GC02P074833	24.771	https://www.genecards.org/cgi-bin/carddisp.pl?gene=HK2
GAPDH	Glyceraldehyde-3-Phosphate Dehydrogenase	Protein Coding	49	GC12P008971	22.8213	https://www.genecards.org/cgi-bin/carddisp.pl?gene=GAPDH
HIF1A	Hypoxia Inducible Factor 1 Subunit Alpha	Protein Coding	49	GC14P061695	22.7316	https://www.genecards.org/cgi-bin/carddisp.pl?gene=HIF1A
LDHA	Lactate Dehydrogenase A	Protein Coding	52	GC11P018394	19.593	https://www.genecards.org/cgi-bin/carddisp.pl?gene=LDHA
TIGAR	TP53 Induced Glycolysis Regulatory Phosphatase	Protein Coding	39	GC12P008915	18.6257	https://www.genecards.org/cgi-bin/carddisp.pl?gene=TIGAR
TPI1	Triosephosphate Isomerase 1	Protein Coding	49	GC12P008992	18.3313	https://www.genecards.org/cgi-bin/carddisp.pl?gene=TPI1
PFKFB3	6-Phosphofructo-2-Kinase/Fructose-2,6-Biphosphatase 3	Protein Coding	46	GC10P006144	17.5936	https://www.genecards.org/cgi-bin/carddisp.pl?gene=PFKFB3
HK1	Hexokinase 1	Protein Coding	52	GC10P069269	16.4066	https://www.genecards.org/cgi-bin/carddisp.pl?gene=HK1
SLC2A1	Solute Carrier Family 2 Member 1	Protein Coding	53	GC01M042925	14.5955	https://www.genecards.org/cgi-bin/carddisp.pl?gene=SLC2A1
ENO1	Enolase 1	Protein Coding	48	GC01M008861	14.5091	https://www.genecards.org/cgi-bin/carddisp.pl?gene=ENO1
GCK	Glucokinase	Protein Coding	52	GC07M044145	14.4946	https://www.genecards.org/cgi-bin/carddisp.pl?gene=GCK
PGK1	Phosphoglycerate Kinase 1	Protein Coding	49	GC0XP077930	14.1263	https://www.genecards.org/cgi-bin/carddisp.pl?gene=PGK1
PFKM	Phosphofructokinase, Muscle	Protein Coding	51	GC12P048105	13.5371	https://www.genecards.org/cgi-bin/carddisp.pl?gene=PFKM
PFKP	Phosphofructokinase, Platelet	Protein Coding	46	GC10P003066	13.4251	https://www.genecards.org/cgi-bin/carddisp.pl?gene=PFKP
PFKL	Phosphofructokinase, Liver Type	Protein Coding	46	GC21P044300	12.337	https://www.genecards.org/cgi-bin/carddisp.pl?gene=PFKL
ALDOA	Aldolase, Fructose-Bisphosphate A	Protein Coding	49	GC16P030064	12.3236	https://www.genecards.org/cgi-bin/carddisp.pl?gene=ALDOA
GPI	Glucose-6-Phosphate Isomerase	Protein Coding	47	GC19P034359	12.024	https://www.genecards.org/cgi-bin/carddisp.pl?gene=GPI
MTOR	Mechanistic Target Of Rapamycin Kinase	Protein Coding	54	GC01M011106	11.5165	https://www.genecards.org/cgi-bin/carddisp.pl?gene=MTOR
PKLR	Pyruvate Kinase L/R	Protein Coding	48	GC01M155289	10.7024	https://www.genecards.org/cgi-bin/carddisp.pl?gene=PKLR
TP53	Tumor Protein P53	Protein Coding	54	GC17M007661	10.6098	https://www.genecards.org/cgi-bin/carddisp.pl?gene=TP53
PGAM1	Phosphoglycerate Mutase 1	Protein Coding	45	GC10P097426	10.291	https://www.genecards.org/cgi-bin/carddisp.pl?gene=PGAM1
PRKAA1	Protein Kinase AMP-Activated Catalytic Subunit Alpha 1	Protein Coding	49	GC05M040759	10.24	https://www.genecards.org/cgi-bin/carddisp.pl?gene=PRKAA1
MYC	MYC Proto-Oncogene, BHLH Transcription Factor	Protein Coding	52	GC08P127735	10.2071	https://www.genecards.org/cgi-bin/carddisp.pl?gene=MYC
ENO2	Enolase 2	Protein Coding	49	GC12P006913	10.1575	https://www.genecards.org/cgi-bin/carddisp.pl?gene=ENO2
INS	Insulin	Protein Coding	49	GC11M002159	10.0933	https://www.genecards.org/cgi-bin/carddisp.pl?gene=INS
ENO3	Enolase 3	Protein Coding	50	GC17P004948	9.66372	https://www.genecards.org/cgi-bin/carddisp.pl?gene=ENO3
PGAM2	Phosphoglycerate Mutase 2	Protein Coding	45	GC07M044062	9.34294	https://www.genecards.org/cgi-bin/carddisp.pl?gene=PGAM2
HK3	Hexokinase 3	Protein Coding	45	GC05M176882	9.10767	https://www.genecards.org/cgi-bin/carddisp.pl?gene=HK3
SLC16A1	Solute Carrier Family 16 Member 1	Protein Coding	49	GC01M112919	9.10599	https://www.genecards.org/cgi-bin/carddisp.pl?gene=SLC16A1
LDHB	Lactate Dehydrogenase B	Protein Coding	47	GC12M021635	9.07043	https://www.genecards.org/cgi-bin/carddisp.pl?gene=LDHB
RRAD	RRAD, Ras Related Glycolysis Inhibitor And Calcium Channel Regulator	Protein Coding	40	GC16M066925	8.91008	https://www.genecards.org/cgi-bin/carddisp.pl?gene=RRAD
AKT1	AKT Serine/Threonine Kinase 1	Protein Coding	55	GC14M104769	8.68055	https://www.genecards.org/cgi-bin/carddisp.pl?gene=AKT1
PFKFB2	6-Phosphofructo-2-Kinase/Fructose-2,6-Biphosphatase 2	Protein Coding	43	GC01P207034	8.6041	https://www.genecards.org/cgi-bin/carddisp.pl?gene=PFKFB2
G6PD	Glucose-6-Phosphate Dehydrogenase	Protein Coding	51	GC0XM154531	8.39925	https://www.genecards.org/cgi-bin/carddisp.pl?gene=G6PD
PDHA1	Pyruvate Dehydrogenase E1 Subunit Alpha 1	Protein Coding	50	GC0XP019343	8.21715	https://www.genecards.org/cgi-bin/carddisp.pl?gene=PDHA1
GAPDHS	Glyceraldehyde-3-Phosphate Dehydrogenase, Spermatogenic	Protein Coding	43	GC19P038711	8.17688	https://www.genecards.org/cgi-bin/carddisp.pl?gene=GAPDHS
MPC1	Mitochondrial Pyruvate Carrier 1	Protein Coding	42	GC06M166364	8.17016	https://www.genecards.org/cgi-bin/carddisp.pl?gene=MPC1
PFKFB4	6-Phosphofructo-2-Kinase/Fructose-2,6-Biphosphatase 4	Protein Coding	42	GC03M048517	7.87437	https://www.genecards.org/cgi-bin/carddisp.pl?gene=PFKFB4
FBP1	Fructose-Bisphosphatase 1	Protein Coding	50	GC09M094603	7.49433	https://www.genecards.org/cgi-bin/carddisp.pl?gene=FBP1
BSG	Basigin (Ok Blood Group)	Protein Coding	45	GC19P000571	7.43342	https://www.genecards.org/cgi-bin/carddisp.pl?gene=BSG
PDK1	Pyruvate Dehydrogenase Kinase 1	Protein Coding	47	GC02P172555	7.42966	https://www.genecards.org/cgi-bin/carddisp.pl?gene=PDK1
FOXK1	Forkhead Box K1	Protein Coding	35	GC07P004682	7.15559	https://www.genecards.org/cgi-bin/carddisp.pl?gene=FOXK1
ALDOC	Aldolase, Fructose-Bisphosphate C	Protein Coding	43	GC17M030252	7.10371	https://www.genecards.org/cgi-bin/carddisp.pl?gene=ALDOC
PRKAA2	Protein Kinase AMP-Activated Catalytic Subunit Alpha 2	Protein Coding	51	GC01P056645	7.10305	https://www.genecards.org/cgi-bin/carddisp.pl?gene=PRKAA2
ADPGK	ADP Dependent Glucokinase	Protein Coding	43	GC15M072751	7.07063	https://www.genecards.org/cgi-bin/carddisp.pl?gene=ADPGK
EGFR	Epidermal Growth Factor Receptor	Protein Coding	55	GC07P055019	7.01517	https://www.genecards.org/cgi-bin/carddisp.pl?gene=EGFR
CS	Citrate Synthase	Protein Coding	45	GC12M056271	7.00767	https://www.genecards.org/cgi-bin/carddisp.pl?gene=CS
SLC16A4	Solute Carrier Family 16 Member 4	Protein Coding	41	GC01M110362	6.8412	https://www.genecards.org/cgi-bin/carddisp.pl?gene=SLC16A4
PGK2	Phosphoglycerate Kinase 2	Protein Coding	42	GC06M049785	6.83	https://www.genecards.org/cgi-bin/carddisp.pl?gene=PGK2
TKT	Transketolase	Protein Coding	48	GC03M053224	6.73479	https://www.genecards.org/cgi-bin/carddisp.pl?gene=TKT
ALDOB	Aldolase, Fructose-Bisphosphate B	Protein Coding	46	GC09M101420	6.55355	https://www.genecards.org/cgi-bin/carddisp.pl?gene=ALDOB
G6PC1	Glucose-6-Phosphatase Catalytic Subunit 1	Protein Coding	36	GC17P044138	6.52278	https://www.genecards.org/cgi-bin/carddisp.pl?gene=G6PC1
FBP2	Fructose-Bisphosphatase 2	Protein Coding	44	GC09M094558	6.46719	https://www.genecards.org/cgi-bin/carddisp.pl?gene=FBP2
STAT3	Signal Transducer And Activator Of Transcription 3	Protein Coding	53	GC17M042313	6.43111	https://www.genecards.org/cgi-bin/carddisp.pl?gene=STAT3
SIRT6	Sirtuin 6	Protein Coding	47	GC19M004174	6.38525	https://www.genecards.org/cgi-bin/carddisp.pl?gene=SIRT6
BPGM	Bisphosphoglycerate Mutase	Protein Coding	46	GC07P134646	6.28056	https://www.genecards.org/cgi-bin/carddisp.pl?gene=BPGM
TKTL1	Transketolase Like 1	Protein Coding	42	GC0XP154295	6.21526	https://www.genecards.org/cgi-bin/carddisp.pl?gene=TKTL1
SLC2A3	Solute Carrier Family 2 Member 3	Protein Coding	49	GC12M007919	6.06331	https://www.genecards.org/cgi-bin/carddisp.pl?gene=SLC2A3
PC	Pyruvate Carboxylase	Protein Coding	48	GC11M066848	6.06285	https://www.genecards.org/cgi-bin/carddisp.pl?gene=PC
TPP2	Tripeptidyl Peptidase 2	Protein Coding	42	GC13P102596	5.95273	https://www.genecards.org/cgi-bin/carddisp.pl?gene=TPP2
PARP1	Poly(ADP-Ribose) Polymerase 1	Protein Coding	50	GC01M226360	5.90184	https://www.genecards.org/cgi-bin/carddisp.pl?gene=PARP1
PDK4	Pyruvate Dehydrogenase Kinase 4	Protein Coding	46	GC07M095583	5.88004	https://www.genecards.org/cgi-bin/carddisp.pl?gene=PDK4
MLXIPL	MLX Interacting Protein Like	Protein Coding	43	GC07M073593	5.85851	https://www.genecards.org/cgi-bin/carddisp.pl?gene=MLXIPL
YAP1	Yes1 Associated Transcriptional Regulator	Protein Coding	49	GC11P102110	5.79317	https://www.genecards.org/cgi-bin/carddisp.pl?gene=YAP1
SIRT3	Sirtuin 3	Protein Coding	49	GC11M000215	5.76308	https://www.genecards.org/cgi-bin/carddisp.pl?gene=SIRT3
FASN	Fatty Acid Synthase	Protein Coding	50	GC17M082078	5.63651	https://www.genecards.org/cgi-bin/carddisp.pl?gene=FASN
PPARG	Peroxisome Proliferator Activated Receptor Gamma	Protein Coding	53	GC03P012287	5.55009	https://www.genecards.org/cgi-bin/carddisp.pl?gene=PPARG
KRAS	KRAS Proto-Oncogene, GTPase	Protein Coding	52	GC12M025204	5.52326	https://www.genecards.org/cgi-bin/carddisp.pl?gene=KRAS
PDK3	Pyruvate Dehydrogenase Kinase 3	Protein Coding	48	GC0XP024465	5.50828	https://www.genecards.org/cgi-bin/carddisp.pl?gene=PDK3
GLS	Glutaminase	Protein Coding	48	GC02P190880	5.47705	https://www.genecards.org/cgi-bin/carddisp.pl?gene=GLS
SLC2A4	Solute Carrier Family 2 Member 4	Protein Coding	47	GC17P007301	5.472	https://www.genecards.org/cgi-bin/carddisp.pl?gene=SLC2A4
UCA1	Urothelial Cancer Associated 1	RNA Gene	23	GC19P015828	5.46238	https://www.genecards.org/cgi-bin/carddisp.pl?gene=UCA1
VDAC1	Voltage Dependent Anion Channel 1	Protein Coding	47	GC05M133975	5.45432	https://www.genecards.org/cgi-bin/carddisp.pl?gene=VDAC1
CA9	Carbonic Anhydrase 9	Protein Coding	45	GC09P035673	5.4031	https://www.genecards.org/cgi-bin/carddisp.pl?gene=CA9
EP300	E1A Binding Protein P300	Protein Coding	52	GC22P041091	5.35714	https://www.genecards.org/cgi-bin/carddisp.pl?gene=EP300
VEGFA	Vascular Endothelial Growth Factor A	Protein Coding	49	GC06P043770	5.34783	https://www.genecards.org/cgi-bin/carddisp.pl?gene=VEGFA
SIRT1	Sirtuin 1	Protein Coding	50	GC10P067884	5.31203	https://www.genecards.org/cgi-bin/carddisp.pl?gene=SIRT1
MIR143	MicroRNA 143	RNA Gene	23	GC05P149410	5.26906	https://www.genecards.org/cgi-bin/carddisp.pl?gene=MIR143
PTEN	Phosphatase And Tensin Homolog	Protein Coding	53	GC10P087863	5.20599	https://www.genecards.org/cgi-bin/carddisp.pl?gene=PTEN
GLO1	Glyoxalase I	Protein Coding	47	GC06M043499	5.14076	https://www.genecards.org/cgi-bin/carddisp.pl?gene=GLO1
FOXK2	Forkhead Box K2	Protein Coding	37	GC17P082519	5.13972	https://www.genecards.org/cgi-bin/carddisp.pl?gene=FOXK2
MIR21	MicroRNA 21	RNA Gene	24	GC17P059841	5.11993	https://www.genecards.org/cgi-bin/carddisp.pl?gene=MIR21
UCP2	Uncoupling Protein 2	Protein Coding	46	GC11M073974	5.11881	https://www.genecards.org/cgi-bin/carddisp.pl?gene=UCP2
PRKAB1	Protein Kinase AMP-Activated Non-Catalytic Subunit Beta 1	Protein Coding	49	GC12P119632	5.09367	https://www.genecards.org/cgi-bin/carddisp.pl?gene=PRKAB1
NFE2L2	Nuclear Factor, Erythroid 2 Like 2	Protein Coding	50	GC02M177227	5.09151	https://www.genecards.org/cgi-bin/carddisp.pl?gene=NFE2L2
SETD2	SET Domain Containing 2, Histone Lysine Methyltransferase	Protein Coding	47	GC03M047033	5.04377	https://www.genecards.org/cgi-bin/carddisp.pl?gene=SETD2
ERBB2	Erb-B2 Receptor Tyrosine Kinase 2	Protein Coding	55	GC17P039687	4.93034	https://www.genecards.org/cgi-bin/carddisp.pl?gene=ERBB2
FZR1	Fizzy And Cell Division Cycle 20 Related 1	Protein Coding	42	GC19P003506	4.89371	https://www.genecards.org/cgi-bin/carddisp.pl?gene=FZR1
SCO2	Synthesis Of Cytochrome C Oxidase 2	Protein Coding	46	GC22M050523	4.87737	https://www.genecards.org/cgi-bin/carddisp.pl?gene=SCO2
PPARGC1A	PPARG Coactivator 1 Alpha	Protein Coding	47	GC04M023755	4.8664	https://www.genecards.org/cgi-bin/carddisp.pl?gene=PPARGC1A
TRAP1	TNF Receptor Associated Protein 1	Protein Coding	44	GC16M003652	4.85186	https://www.genecards.org/cgi-bin/carddisp.pl?gene=TRAP1
PCK1	Phosphoenolpyruvate Carboxykinase 1	Protein Coding	49	GC20P057561	4.83801	https://www.genecards.org/cgi-bin/carddisp.pl?gene=PCK1
PDK2	Pyruvate Dehydrogenase Kinase 2	Protein Coding	44	GC17P050095	4.83534	https://www.genecards.org/cgi-bin/carddisp.pl?gene=PDK2
CBFA2T3	CBFA2/RUNX1 Partner Transcriptional Co-Repressor 3	Protein Coding	42	GC16M088874	4.82759	https://www.genecards.org/cgi-bin/carddisp.pl?gene=CBFA2T3
AIFM1	Apoptosis Inducing Factor Mitochondria Associated 1	Protein Coding	49	GC0XM130129	4.80694	https://www.genecards.org/cgi-bin/carddisp.pl?gene=AIFM1
ZBTB7A	Zinc Finger And BTB Domain Containing 7A	Protein Coding	36	GC19M004045	4.79441	https://www.genecards.org/cgi-bin/carddisp.pl?gene=ZBTB7A
PTBP1	Polypyrimidine Tract Binding Protein 1	Protein Coding	43	GC19P000797	4.78363	https://www.genecards.org/cgi-bin/carddisp.pl?gene=PTBP1
ISCU	Iron-Sulfur Cluster Assembly Enzyme	Protein Coding	45	GC12P108561	4.76339	https://www.genecards.org/cgi-bin/carddisp.pl?gene=ISCU
SOD1	Superoxide Dismutase 1	Protein Coding	53	GC21P031659	4.76087	https://www.genecards.org/cgi-bin/carddisp.pl?gene=SOD1
PRKG1	Protein Kinase CGMP-Dependent 1	Protein Coding	52	GC10P050991	4.75354	https://www.genecards.org/cgi-bin/carddisp.pl?gene=PRKG1
EPAS1	Endothelial PAS Domain Protein 1	Protein Coding	50	GC02P046293	4.73638	https://www.genecards.org/cgi-bin/carddisp.pl?gene=EPAS1
HSPA5	Heat Shock Protein Family A (Hsp70) Member 5	Protein Coding	48	GC09M125234	4.73405	https://www.genecards.org/cgi-bin/carddisp.pl?gene=HSPA5
PIK3CA	Phosphatidylinositol-4,5-Bisphosphate 3-Kinase Catalytic Subunit Alpha	Protein Coding	53	GC03P179148	4.71351	https://www.genecards.org/cgi-bin/carddisp.pl?gene=PIK3CA
PRXL2C	Peroxiredoxin Like 2C	Protein Coding	23	GC09M096640	4.69437	https://www.genecards.org/cgi-bin/carddisp.pl?gene=PRXL2C
YWHAZ	Tyrosine 3-Monooxygenase/Tryptophan 5-Monooxygenase Activation Protein Zeta	Protein Coding	49	GC08M100917	4.63105	https://www.genecards.org/cgi-bin/carddisp.pl?gene=YWHAZ
SOD2	Superoxide Dismutase 2	Protein Coding	52	GC06M159669	4.59839	https://www.genecards.org/cgi-bin/carddisp.pl?gene=SOD2
SDHB	Succinate Dehydrogenase Complex Iron Sulfur Subunit B	Protein Coding	49	GC01M017065	4.59227	https://www.genecards.org/cgi-bin/carddisp.pl?gene=SDHB
TGM2	Transglutaminase 2	Protein Coding	49	GC20M038127	4.57114	https://www.genecards.org/cgi-bin/carddisp.pl?gene=TGM2
FGFR1	Fibroblast Growth Factor Receptor 1	Protein Coding	56	GC08M038400	4.55136	https://www.genecards.org/cgi-bin/carddisp.pl?gene=FGFR1
IDH1	Isocitrate Dehydrogenase (NADP(+)) 1	Protein Coding	53	GC02M208236	4.51553	https://www.genecards.org/cgi-bin/carddisp.pl?gene=IDH1
ENTPD5	Ectonucleoside Triphosphate Diphosphohydrolase 5 (Inactive)	Protein Coding	43	GC14M073958	4.50819	https://www.genecards.org/cgi-bin/carddisp.pl?gene=ENTPD5
EGLN3	Egl-9 Family Hypoxia Inducible Factor 3	Protein Coding	47	GC14M033924	4.46688	https://www.genecards.org/cgi-bin/carddisp.pl?gene=EGLN3
HNRNPA2B1	Heterogeneous Nuclear Ribonucleoprotein A2/B1	Protein Coding	47	GC07M026174	4.41072	https://www.genecards.org/cgi-bin/carddisp.pl?gene=HNRNPA2B1
SLC2A6	Solute Carrier Family 2 Member 6	Protein Coding	42	GC09M133471	4.38357	https://www.genecards.org/cgi-bin/carddisp.pl?gene=SLC2A6
CD44	CD44 Molecule (Indian Blood Group)	Protein Coding	48	GC11P035139	4.35195	https://www.genecards.org/cgi-bin/carddisp.pl?gene=CD44
ACACA	Acetyl-CoA Carboxylase Alpha	Protein Coding	50	GC17M037084	4.35122	https://www.genecards.org/cgi-bin/carddisp.pl?gene=ACACA
PPARA	Peroxisome Proliferator Activated Receptor Alpha	Protein Coding	47	GC22P046150	4.34612	https://www.genecards.org/cgi-bin/carddisp.pl?gene=PPARA
PGAM4	Phosphoglycerate Mutase Family Member 4	Protein Coding	35	GC0XM077967	4.31179	https://www.genecards.org/cgi-bin/carddisp.pl?gene=PGAM4
PDHX	Pyruvate Dehydrogenase Complex Component X	Protein Coding	49	GC11P034894	4.30683	https://www.genecards.org/cgi-bin/carddisp.pl?gene=PDHX
PDP1	Pyruvate Dehyrogenase Phosphatase Catalytic Subunit 1	Protein Coding	47	GC08P093857	4.29757	https://www.genecards.org/cgi-bin/carddisp.pl?gene=PDP1
PGD	Phosphogluconate Dehydrogenase	Protein Coding	47	GC01P010398	4.28326	https://www.genecards.org/cgi-bin/carddisp.pl?gene=PGD
RELA	RELA Proto-Oncogene, NF-KB Subunit	Protein Coding	51	GC11M065653	4.28129	https://www.genecards.org/cgi-bin/carddisp.pl?gene=RELA
CTNNB1	Catenin Beta 1	Protein Coding	54	GC03P041236	4.27588	https://www.genecards.org/cgi-bin/carddisp.pl?gene=CTNNB1
MDH2	Malate Dehydrogenase 2	Protein Coding	49	GC07P076048	4.23144	https://www.genecards.org/cgi-bin/carddisp.pl?gene=MDH2
BRCA1	BRCA1 DNA Repair Associated	Protein Coding	52	GC17M043044	4.23012	https://www.genecards.org/cgi-bin/carddisp.pl?gene=BRCA1
SLC25A5	Solute Carrier Family 25 Member 5	Protein Coding	45	GC0XP119468	4.22084	https://www.genecards.org/cgi-bin/carddisp.pl?gene=SLC25A5
VHL	Von Hippel-Lindau Tumor Suppressor	Protein Coding	48	GC03P010227	4.20541	https://www.genecards.org/cgi-bin/carddisp.pl?gene=VHL
LDHC	Lactate Dehydrogenase C	Protein Coding	43	GC11P018433	4.19026	https://www.genecards.org/cgi-bin/carddisp.pl?gene=LDHC
CAV1	Caveolin 1	Protein Coding	49	GC07P116524	4.17739	https://www.genecards.org/cgi-bin/carddisp.pl?gene=CAV1
PDHB	Pyruvate Dehydrogenase E1 Subunit Beta	Protein Coding	47	GC03M058428	4.14446	https://www.genecards.org/cgi-bin/carddisp.pl?gene=PDHB
NXNL1	Nucleoredoxin Like 1	Protein Coding	36	GC19M017455	4.13631	https://www.genecards.org/cgi-bin/carddisp.pl?gene=NXNL1
LIN28A	Lin-28 Homolog A	Protein Coding	41	GC01P026410	4.13371	https://www.genecards.org/cgi-bin/carddisp.pl?gene=LIN28A
ACLY	ATP Citrate Lyase	Protein Coding	47	GC17M041866	4.08638	https://www.genecards.org/cgi-bin/carddisp.pl?gene=ACLY
EZH2	Enhancer Of Zeste 2 Polycomb Repressive Complex 2 Subunit	Protein Coding	54	GC07M148807	4.07627	https://www.genecards.org/cgi-bin/carddisp.pl?gene=EZH2
PCK2	Phosphoenolpyruvate Carboxykinase 2, Mitochondrial	Protein Coding	47	GC14P024094	4.07438	https://www.genecards.org/cgi-bin/carddisp.pl?gene=PCK2
TGFB1	Transforming Growth Factor Beta 1	Protein Coding	53	GC19M041301	4.06905	https://www.genecards.org/cgi-bin/carddisp.pl?gene=TGFB1
NFKB1	Nuclear Factor Kappa B Subunit 1	Protein Coding	53	GC04P102501	4.06033	https://www.genecards.org/cgi-bin/carddisp.pl?gene=NFKB1
E2F1	E2F Transcription Factor 1	Protein Coding	45	GC20M033675	4.05825	https://www.genecards.org/cgi-bin/carddisp.pl?gene=E2F1
HSP90B1	Heat Shock Protein 90 Beta Family Member 1	Protein Coding	47	GC12P103930	4.03343	https://www.genecards.org/cgi-bin/carddisp.pl?gene=HSP90B1
MUC1	Mucin 1, Cell Surface Associated	Protein Coding	48	GC01M155185	4.03084	https://www.genecards.org/cgi-bin/carddisp.pl?gene=MUC1
HNRNPA1	Heterogeneous Nuclear Ribonucleoprotein A1	Protein Coding	47	GC12P054280	4.03017	https://www.genecards.org/cgi-bin/carddisp.pl?gene=HNRNPA1
HSPD1	Heat Shock Protein Family D (Hsp60) Member 1	Protein Coding	49	GC02M197486	4.02158	https://www.genecards.org/cgi-bin/carddisp.pl?gene=HSPD1
TP63	Tumor Protein P63	Protein Coding	49	GC03P189598	4.01338	https://www.genecards.org/cgi-bin/carddisp.pl?gene=TP63
ECD	Ecdysoneless Cell Cycle Regulator	Protein Coding	36	GC10M073130	3.97849	https://www.genecards.org/cgi-bin/carddisp.pl?gene=ECD
SRC	SRC Proto-Oncogene, Non-Receptor Tyrosine Kinase	Protein Coding	53	GC20P037344	3.95588	https://www.genecards.org/cgi-bin/carddisp.pl?gene=SRC
DBNL	Drebrin Like	Protein Coding	41	GC07P044044	3.9399	https://www.genecards.org/cgi-bin/carddisp.pl?gene=DBNL
VIM	Vimentin	Protein Coding	51	GC10P017227	3.93316	https://www.genecards.org/cgi-bin/carddisp.pl?gene=VIM
MIR34A	MicroRNA 34a	RNA Gene	22	GC01M009151	3.8891	https://www.genecards.org/cgi-bin/carddisp.pl?gene=MIR34A
HSP90AA1	Heat Shock Protein 90 Alpha Family Class A Member 1	Protein Coding	49	GC14M102080	3.88377	https://www.genecards.org/cgi-bin/carddisp.pl?gene=HSP90AA1
FOXO3	Forkhead Box O3	Protein Coding	45	GC06P108559	3.87365	https://www.genecards.org/cgi-bin/carddisp.pl?gene=FOXO3
PVT1	Pvt1 Oncogene	RNA Gene	24	GC08P127804	3.85753	https://www.genecards.org/cgi-bin/carddisp.pl?gene=PVT1
SIRT4	Sirtuin 4	Protein Coding	41	GC12P120291	3.85137	https://www.genecards.org/cgi-bin/carddisp.pl?gene=SIRT4
CD274	CD274 Molecule	Protein Coding	46	GC09P005450	3.83362	https://www.genecards.org/cgi-bin/carddisp.pl?gene=CD274
RPS6KB1	Ribosomal Protein S6 Kinase B1	Protein Coding	50	GC17P059893	3.82953	https://www.genecards.org/cgi-bin/carddisp.pl?gene=RPS6KB1
SIRT5	Sirtuin 5	Protein Coding	46	GC06P013574	3.82655	https://www.genecards.org/cgi-bin/carddisp.pl?gene=SIRT5
H6PD	Hexose-6-Phosphate Dehydrogenase/Glucose 1-Dehydrogenase	Protein Coding	43	GC01P009234	3.75808	https://www.genecards.org/cgi-bin/carddisp.pl?gene=H6PD
NOX4	NADPH Oxidase 4	Protein Coding	43	GC11M089324	3.75755	https://www.genecards.org/cgi-bin/carddisp.pl?gene=NOX4
PIM2	Pim-2 Proto-Oncogene, Serine/Threonine Kinase	Protein Coding	46	GC0XM048913	3.7394	https://www.genecards.org/cgi-bin/carddisp.pl?gene=PIM2
PDIA3	Protein Disulfide Isomerase Family A Member 3	Protein Coding	46	GC15P043746	3.73647	https://www.genecards.org/cgi-bin/carddisp.pl?gene=PDIA3
MCL1	MCL1 Apoptosis Regulator, BCL2 Family Member	Protein Coding	49	GC01M150561	3.73382	https://www.genecards.org/cgi-bin/carddisp.pl?gene=MCL1
HOTAIR	HOX Transcript Antisense RNA	RNA Gene	25	GC12M053962	3.7187	https://www.genecards.org/cgi-bin/carddisp.pl?gene=HOTAIR
GPD1	Glycerol-3-Phosphate Dehydrogenase 1	Protein Coding	46	GC12P050105	3.71642	https://www.genecards.org/cgi-bin/carddisp.pl?gene=GPD1
HAGH	Hydroxyacylglutathione Hydrolase	Protein Coding	43	GC16M001795	3.70215	https://www.genecards.org/cgi-bin/carddisp.pl?gene=HAGH
CAT	Catalase	Protein Coding	50	GC11P034460	3.69676	https://www.genecards.org/cgi-bin/carddisp.pl?gene=CAT
TP73	Tumor Protein P73	Protein Coding	47	GC01P003652	3.68033	https://www.genecards.org/cgi-bin/carddisp.pl?gene=TP73
MLX	MAX Dimerization Protein MLX	Protein Coding	45	GC17P042567	3.68033	https://www.genecards.org/cgi-bin/carddisp.pl?gene=MLX
HSF1	Heat Shock Transcription Factor 1	Protein Coding	46	GC08P144291	3.67062	https://www.genecards.org/cgi-bin/carddisp.pl?gene=HSF1
BRAF	B-Raf Proto-Oncogene, Serine/Threonine Kinase	Protein Coding	54	GC07M140715	3.67047	https://www.genecards.org/cgi-bin/carddisp.pl?gene=BRAF
SLC2A2	Solute Carrier Family 2 Member 2	Protein Coding	50	GC03M170996	3.64992	https://www.genecards.org/cgi-bin/carddisp.pl?gene=SLC2A2
SKP2	S-Phase Kinase Associated Protein 2	Protein Coding	45	GC05P036151	3.64133	https://www.genecards.org/cgi-bin/carddisp.pl?gene=SKP2
FBXW7	F-Box And WD Repeat Domain Containing 7	Protein Coding	45	GC04M152321	3.59918	https://www.genecards.org/cgi-bin/carddisp.pl?gene=FBXW7
SP1	Sp1 Transcription Factor	Protein Coding	45	GC12P053380	3.58425	https://www.genecards.org/cgi-bin/carddisp.pl?gene=SP1
OPA1	OPA1 Mitochondrial Dynamin Like GTPase	Protein Coding	45	GC03P193594	3.58169	https://www.genecards.org/cgi-bin/carddisp.pl?gene=OPA1
NPM1	Nucleophosmin 1	Protein Coding	51	GC05P171387	3.57818	https://www.genecards.org/cgi-bin/carddisp.pl?gene=NPM1
HDAC1	Histone Deacetylase 1	Protein Coding	50	GC01P032292	3.57523	https://www.genecards.org/cgi-bin/carddisp.pl?gene=HDAC1
TEAD1	TEA Domain Transcription Factor 1	Protein Coding	49	GC11P012674	3.57493	https://www.genecards.org/cgi-bin/carddisp.pl?gene=TEAD1
BAD	BCL2 Associated Agonist Of Cell Death	Protein Coding	47	GC11M064738	3.5716	https://www.genecards.org/cgi-bin/carddisp.pl?gene=BAD
KEAP1	Kelch Like ECH Associated Protein 1	Protein Coding	49	GC19M010486	3.5676	https://www.genecards.org/cgi-bin/carddisp.pl?gene=KEAP1
TNF	Tumor Necrosis Factor	Protein Coding	52	GC06P049352	3.52374	https://www.genecards.org/cgi-bin/carddisp.pl?gene=TNF
CDKN3	Cyclin Dependent Kinase Inhibitor 3	Protein Coding	43	GC14P054398	3.51868	https://www.genecards.org/cgi-bin/carddisp.pl?gene=CDKN3
MIR125B1	MicroRNA 125b-1	RNA Gene	21	GC11M122100	3.5002	https://www.genecards.org/cgi-bin/carddisp.pl?gene=MIR125B1
WWTR1	WW Domain Containing Transcription Regulator 1	Protein Coding	43	GC03M149517	3.49148	https://www.genecards.org/cgi-bin/carddisp.pl?gene=WWTR1
EGLN1	Egl-9 Family Hypoxia Inducible Factor 1	Protein Coding	50	GC01M231363	3.49002	https://www.genecards.org/cgi-bin/carddisp.pl?gene=EGLN1
BCL2	BCL2 Apoptosis Regulator	Protein Coding	52	GC18M063123	3.4719	https://www.genecards.org/cgi-bin/carddisp.pl?gene=BCL2
FOXO1	Forkhead Box O1	Protein Coding	49	GC13M040555	3.47095	https://www.genecards.org/cgi-bin/carddisp.pl?gene=FOXO1
UQCRC2	Ubiquinol-Cytochrome C Reductase Core Protein 2	Protein Coding	47	GC16P021963	3.46947	https://www.genecards.org/cgi-bin/carddisp.pl?gene=UQCRC2
MIR186	MicroRNA 186	RNA Gene	18	GC01M071067	3.46832	https://www.genecards.org/cgi-bin/carddisp.pl?gene=MIR186
PPBP	Pro-Platelet Basic Protein	Protein Coding	44	GC04M073986	3.458	https://www.genecards.org/cgi-bin/carddisp.pl?gene=PPBP
GYS1	Glycogen Synthase 1	Protein Coding	50	GC19M048970	3.45528	https://www.genecards.org/cgi-bin/carddisp.pl?gene=GYS1
MLXIP	MLX Interacting Protein	Protein Coding	34	GC12P122078	3.44627	https://www.genecards.org/cgi-bin/carddisp.pl?gene=MLXIP
MIR122	MicroRNA 122	RNA Gene	21	GC18P058451	3.44482	https://www.genecards.org/cgi-bin/carddisp.pl?gene=MIR122
HIF1AN	Hypoxia Inducible Factor 1 Subunit Alpha Inhibitor	Protein Coding	46	GC10P100529	3.44395	https://www.genecards.org/cgi-bin/carddisp.pl?gene=HIF1AN
GLUL	Glutamate-Ammonia Ligase	Protein Coding	50	GC01M182378	3.44236	https://www.genecards.org/cgi-bin/carddisp.pl?gene=GLUL
TXNIP	Thioredoxin Interacting Protein	Protein Coding	38	GC01M145992	3.41999	https://www.genecards.org/cgi-bin/carddisp.pl?gene=TXNIP
XDH	Xanthine Dehydrogenase	Protein Coding	47	GC02M031334	3.41702	https://www.genecards.org/cgi-bin/carddisp.pl?gene=XDH
ACMSD	Aminocarboxymuconate Semialdehyde Decarboxylase	Protein Coding	40	GC02P134838	3.41587	https://www.genecards.org/cgi-bin/carddisp.pl?gene=ACMSD
LINC00092	Long Intergenic Non-Protein Coding RNA 92	RNA Gene	16	GC09M096019	3.41587	https://www.genecards.org/cgi-bin/carddisp.pl?gene=LINC00092
CASC8	Cancer Susceptibility 8	RNA Gene	15	GC08M128228	3.41587	https://www.genecards.org/cgi-bin/carddisp.pl?gene=CASC8
AKR1B1	Aldo-Keto Reductase Family 1 Member B	Protein Coding	49	GC07M134442	3.41418	https://www.genecards.org/cgi-bin/carddisp.pl?gene=AKR1B1
KDR	Kinase Insert Domain Receptor	Protein Coding	54	GC04M055078	3.40686	https://www.genecards.org/cgi-bin/carddisp.pl?gene=KDR
DNAH8	Dynein Axonemal Heavy Chain 8	Protein Coding	38	GC06P049542	3.40165	https://www.genecards.org/cgi-bin/carddisp.pl?gene=DNAH8
LEP	Leptin	Protein Coding	48	GC07P128241	3.39932	https://www.genecards.org/cgi-bin/carddisp.pl?gene=LEP
GPT	Glutamic--Pyruvic Transaminase	Protein Coding	42	GC08P144502	3.39756	https://www.genecards.org/cgi-bin/carddisp.pl?gene=GPT
AKT2	AKT Serine/Threonine Kinase 2	Protein Coding	55	GC19M040230	3.38435	https://www.genecards.org/cgi-bin/carddisp.pl?gene=AKT2
OGDH	Oxoglutarate Dehydrogenase	Protein Coding	46	GC07P044606	3.38313	https://www.genecards.org/cgi-bin/carddisp.pl?gene=OGDH
IGF1	Insulin Like Growth Factor 1	Protein Coding	50	GC12M102395	3.3802	https://www.genecards.org/cgi-bin/carddisp.pl?gene=IGF1
CD276	CD276 Molecule	Protein Coding	41	GC15P073683	3.37871	https://www.genecards.org/cgi-bin/carddisp.pl?gene=CD276
LIN28B	Lin-28 Homolog B	Protein Coding	43	GC06P104941	3.37449	https://www.genecards.org/cgi-bin/carddisp.pl?gene=LIN28B
RPS7	Ribosomal Protein S7	Protein Coding	43	GC02P003575	3.37449	https://www.genecards.org/cgi-bin/carddisp.pl?gene=RPS7
ETS1	ETS Proto-Oncogene 1, Transcription Factor	Protein Coding	50	GC11M128458	3.37317	https://www.genecards.org/cgi-bin/carddisp.pl?gene=ETS1
EEF1A1	Eukaryotic Translation Elongation Factor 1 Alpha 1	Protein Coding	45	GC06M073515	3.37317	https://www.genecards.org/cgi-bin/carddisp.pl?gene=EEF1A1
PDPR	Pyruvate Dehydrogenase Phosphatase Regulatory Subunit	Protein Coding	39	GC16P070113	3.37089	https://www.genecards.org/cgi-bin/carddisp.pl?gene=PDPR
HSPA8	Heat Shock Protein Family A (Hsp70) Member 8	Protein Coding	48	GC11M123057	3.36998	https://www.genecards.org/cgi-bin/carddisp.pl?gene=HSPA8
PRKN	Parkin RBR E3 Ubiquitin Protein Ligase	Protein Coding	41	GC06M161348	3.35969	https://www.genecards.org/cgi-bin/carddisp.pl?gene=PRKN
MIR214	MicroRNA 214	RNA Gene	20	GC01M172234	3.35369	https://www.genecards.org/cgi-bin/carddisp.pl?gene=MIR214
PPP1CA	Protein Phosphatase 1 Catalytic Subunit Alpha	Protein Coding	49	GC11M067402	3.34864	https://www.genecards.org/cgi-bin/carddisp.pl?gene=PPP1CA
AKR1A1	Aldo-Keto Reductase Family 1 Member A1	Protein Coding	45	GC01P045550	3.33012	https://www.genecards.org/cgi-bin/carddisp.pl?gene=AKR1A1
MYCN	MYCN Proto-Oncogene, BHLH Transcription Factor	Protein Coding	47	GC02P015949	3.32176	https://www.genecards.org/cgi-bin/carddisp.pl?gene=MYCN
IDO1	Indoleamine 2,3-Dioxygenase 1	Protein Coding	46	GC08P039891	3.31533	https://www.genecards.org/cgi-bin/carddisp.pl?gene=IDO1
PRDX6	Peroxiredoxin 6	Protein Coding	47	GC01P173477	3.29795	https://www.genecards.org/cgi-bin/carddisp.pl?gene=PRDX6
FOXM1	Forkhead Box M1	Protein Coding	45	GC12M002857	3.29374	https://www.genecards.org/cgi-bin/carddisp.pl?gene=FOXM1
ESRRA	Estrogen Related Receptor Alpha	Protein Coding	48	GC11P064305	3.29334	https://www.genecards.org/cgi-bin/carddisp.pl?gene=ESRRA
MIR124-1	MicroRNA 124-1	RNA Gene	21	GC08M009903	3.26594	https://www.genecards.org/cgi-bin/carddisp.pl?gene=MIR124-1
MALAT1	Metastasis Associated Lung Adenocarcinoma Transcript 1	RNA Gene	23	GC11P065904	3.26528	https://www.genecards.org/cgi-bin/carddisp.pl?gene=MALAT1
EGLN2	Egl-9 Family Hypoxia Inducible Factor 2	Protein Coding	46	GC19P040799	3.261	https://www.genecards.org/cgi-bin/carddisp.pl?gene=EGLN2
GCG	Glucagon	Protein Coding	42	GC02M162142	3.258	https://www.genecards.org/cgi-bin/carddisp.pl?gene=GCG
PDHA2	Pyruvate Dehydrogenase E1 Subunit Alpha 2	Protein Coding	43	GC04P095840	3.24705	https://www.genecards.org/cgi-bin/carddisp.pl?gene=PDHA2
GPD2	Glycerol-3-Phosphate Dehydrogenase 2	Protein Coding	47	GC02P156435	3.24104	https://www.genecards.org/cgi-bin/carddisp.pl?gene=GPD2
SLC25A31	Solute Carrier Family 25 Member 31	Protein Coding	40	GC04P127730	3.2397	https://www.genecards.org/cgi-bin/carddisp.pl?gene=SLC25A31
LMNB1	Lamin B1	Protein Coding	49	GC05P126776	3.21751	https://www.genecards.org/cgi-bin/carddisp.pl?gene=LMNB1
RIPK1	Receptor Interacting Serine/Threonine Kinase 1	Protein Coding	50	GC06P003064	3.21422	https://www.genecards.org/cgi-bin/carddisp.pl?gene=RIPK1
GLUD1	Glutamate Dehydrogenase 1	Protein Coding	50	GC10M087050	3.21079	https://www.genecards.org/cgi-bin/carddisp.pl?gene=GLUD1
BIRC5	Baculoviral IAP Repeat Containing 5	Protein Coding	47	GC17P078214	3.20268	https://www.genecards.org/cgi-bin/carddisp.pl?gene=BIRC5
EPO	Erythropoietin	Protein Coding	42	GC07P100720	3.19801	https://www.genecards.org/cgi-bin/carddisp.pl?gene=EPO
MTDH	Metadherin	Protein Coding	42	GC08P097643	3.19427	https://www.genecards.org/cgi-bin/carddisp.pl?gene=MTDH
HDAC4	Histone Deacetylase 4	Protein Coding	52	GC02M239048	3.18921	https://www.genecards.org/cgi-bin/carddisp.pl?gene=HDAC4
XRCC6	X-Ray Repair Cross Complementing 6	Protein Coding	47	GC22P041622	3.17746	https://www.genecards.org/cgi-bin/carddisp.pl?gene=XRCC6
PPP2R1A	Protein Phosphatase 2 Scaffold Subunit Aalpha	Protein Coding	48	GC19P052189	3.16968	https://www.genecards.org/cgi-bin/carddisp.pl?gene=PPP2R1A
ACTN1	Actinin Alpha 1	Protein Coding	51	GC14M068874	3.16182	https://www.genecards.org/cgi-bin/carddisp.pl?gene=ACTN1
MDH1	Malate Dehydrogenase 1	Protein Coding	47	GC02P063557	3.15437	https://www.genecards.org/cgi-bin/carddisp.pl?gene=MDH1
MFN2	Mitofusin 2	Protein Coding	49	GC01P011980	3.15289	https://www.genecards.org/cgi-bin/carddisp.pl?gene=MFN2
PRKACA	Protein Kinase CAMP-Activated Catalytic Subunit Alpha	Protein Coding	52	GC19M014092	3.14798	https://www.genecards.org/cgi-bin/carddisp.pl?gene=PRKACA
MIR142	MicroRNA 142	RNA Gene	20	GC17M058331	3.14714	https://www.genecards.org/cgi-bin/carddisp.pl?gene=MIR142
OGT	O-Linked N-Acetylglucosamine (GlcNAc) Transferase	Protein Coding	45	GC0XP071534	3.1449	https://www.genecards.org/cgi-bin/carddisp.pl?gene=OGT
AMPD3	Adenosine Monophosphate Deaminase 3	Protein Coding	46	GC11P010309	3.12661	https://www.genecards.org/cgi-bin/carddisp.pl?gene=AMPD3
CCT2	Chaperonin Containing TCP1 Subunit 2	Protein Coding	42	GC12P069585	3.123	https://www.genecards.org/cgi-bin/carddisp.pl?gene=CCT2
HSPB1	Heat Shock Protein Family B (Small) Member 1	Protein Coding	53	GC07P076302	3.10667	https://www.genecards.org/cgi-bin/carddisp.pl?gene=HSPB1
SQSTM1	Sequestosome 1	Protein Coding	49	GC05P179806	3.09332	https://www.genecards.org/cgi-bin/carddisp.pl?gene=SQSTM1
MIR182	MicroRNA 182	RNA Gene	20	GC07M129770	3.09332	https://www.genecards.org/cgi-bin/carddisp.pl?gene=MIR182
SMARCA4	SWI/SNF Related, Matrix Associated, Actin Dependent Regulator Of Chromatin, Subfamily A, Member 4	Protein Coding	51	GC19P010932	3.08247	https://www.genecards.org/cgi-bin/carddisp.pl?gene=SMARCA4
SNCA	Synuclein Alpha	Protein Coding	50	GC04M089724	3.06984	https://www.genecards.org/cgi-bin/carddisp.pl?gene=SNCA
NDRG1	N-Myc Downstream Regulated 1	Protein Coding	46	GC08M133237	3.06984	https://www.genecards.org/cgi-bin/carddisp.pl?gene=NDRG1
NDUFB9	NADH:Ubiquinone Oxidoreductase Subunit B9	Protein Coding	45	GC08P124539	3.06188	https://www.genecards.org/cgi-bin/carddisp.pl?gene=NDUFB9
FUBP1	Far Upstream Element Binding Protein 1	Protein Coding	39	GC01M077944	3.05525	https://www.genecards.org/cgi-bin/carddisp.pl?gene=FUBP1
CPT1A	Carnitine Palmitoyltransferase 1A	Protein Coding	50	GC11M068754	3.05489	https://www.genecards.org/cgi-bin/carddisp.pl?gene=CPT1A
PDCD1	Programmed Cell Death 1	Protein Coding	49	GC02M241849	3.04728	https://www.genecards.org/cgi-bin/carddisp.pl?gene=PDCD1
ENO4	Enolase 4	Protein Coding	30	GC10P116849	3.04556	https://www.genecards.org/cgi-bin/carddisp.pl?gene=ENO4
PLEC	Plectin	Protein Coding	43	GC08M143916	3.04367	https://www.genecards.org/cgi-bin/carddisp.pl?gene=PLEC
PPIA	Peptidylprolyl Isomerase A	Protein Coding	48	GC07P044807	3.0363	https://www.genecards.org/cgi-bin/carddisp.pl?gene=PPIA
TARDBP	TAR DNA Binding Protein	Protein Coding	47	GC01P011013	3.0363	https://www.genecards.org/cgi-bin/carddisp.pl?gene=TARDBP
CYTOR	Cytoskeleton Regulator RNA	RNA Gene	17	GC02P087508	3.0363	https://www.genecards.org/cgi-bin/carddisp.pl?gene=CYTOR
MIR125A	MicroRNA 125a	RNA Gene	21	GC19P051720	3.032	https://www.genecards.org/cgi-bin/carddisp.pl?gene=MIR125A
IMMT	Inner Membrane Mitochondrial Protein	Protein Coding	41	GC02M086144	3.02294	https://www.genecards.org/cgi-bin/carddisp.pl?gene=IMMT
ACTL6A	Actin Like 6A	Protein Coding	42	GC03P179562	3.0218	https://www.genecards.org/cgi-bin/carddisp.pl?gene=ACTL6A
EGF	Epidermal Growth Factor	Protein Coding	52	GC04P109912	2.98125	https://www.genecards.org/cgi-bin/carddisp.pl?gene=EGF
FH	Fumarate Hydratase	Protein Coding	46	GC01M241499	2.97802	https://www.genecards.org/cgi-bin/carddisp.pl?gene=FH
TUG1	Taurine Up-Regulated 1	RNA Gene	24	GC22P030969	2.97772	https://www.genecards.org/cgi-bin/carddisp.pl?gene=TUG1
EPB41L4A-AS1	EPB41L4A Antisense RNA 1	RNA Gene	16	GC05P112160	2.97772	https://www.genecards.org/cgi-bin/carddisp.pl?gene=EPB41L4A-AS1
SND1	Staphylococcal Nuclease And Tudor Domain Containing 1	Protein Coding	43	GC07P127652	2.97606	https://www.genecards.org/cgi-bin/carddisp.pl?gene=SND1
PRPF8	Pre-MRNA Processing Factor 8	Protein Coding	42	GC17M001650	2.97606	https://www.genecards.org/cgi-bin/carddisp.pl?gene=PRPF8
TSR1	TSR1 Ribosome Maturation Factor	Protein Coding	39	GC17M002322	2.97606	https://www.genecards.org/cgi-bin/carddisp.pl?gene=TSR1
SEPTIN2	Septin 2	Protein Coding	34	GC02P241316	2.97606	https://www.genecards.org/cgi-bin/carddisp.pl?gene=SEPTIN2
CAVIN1	Caveolae Associated Protein 1	Protein Coding	33	GC17M042404	2.97606	https://www.genecards.org/cgi-bin/carddisp.pl?gene=CAVIN1
MIR139	MicroRNA 139	RNA Gene	19	GC11M072615	2.97606	https://www.genecards.org/cgi-bin/carddisp.pl?gene=MIR139
PCNA	Proliferating Cell Nuclear Antigen	Protein Coding	53	GC20M005114	2.97204	https://www.genecards.org/cgi-bin/carddisp.pl?gene=PCNA
IGF2BP2	Insulin Like Growth Factor 2 MRNA Binding Protein 2	Protein Coding	45	GC03M185643	2.97204	https://www.genecards.org/cgi-bin/carddisp.pl?gene=IGF2BP2
ESR1	Estrogen Receptor 1	Protein Coding	54	GC06P151656	2.95445	https://www.genecards.org/cgi-bin/carddisp.pl?gene=ESR1
BAX	BCL2 Associated X, Apoptosis Regulator	Protein Coding	50	GC19P048954	2.95445	https://www.genecards.org/cgi-bin/carddisp.pl?gene=BAX
CHKA	Choline Kinase Alpha	Protein Coding	42	GC11M068052	2.94575	https://www.genecards.org/cgi-bin/carddisp.pl?gene=CHKA
MIR155	MicroRNA 155	RNA Gene	19	GC21P025573	2.94575	https://www.genecards.org/cgi-bin/carddisp.pl?gene=MIR155
SHMT2	Serine Hydroxymethyltransferase 2	Protein Coding	46	GC12P057229	2.94467	https://www.genecards.org/cgi-bin/carddisp.pl?gene=SHMT2
PHGDH	Phosphoglycerate Dehydrogenase	Protein Coding	50	GC01P119660	2.93171	https://www.genecards.org/cgi-bin/carddisp.pl?gene=PHGDH
RPS6	Ribosomal Protein S6	Protein Coding	45	GC09M019375	2.92981	https://www.genecards.org/cgi-bin/carddisp.pl?gene=RPS6
ACTB	Actin Beta	Protein Coding	50	GC07M005527	2.92833	https://www.genecards.org/cgi-bin/carddisp.pl?gene=ACTB
NECAB3	N-Terminal EF-Hand Calcium Binding Protein 3	Protein Coding	33	GC20M033659	2.92797	https://www.genecards.org/cgi-bin/carddisp.pl?gene=NECAB3
MB	Myoglobin	Protein Coding	45	GC22M035606	2.92188	https://www.genecards.org/cgi-bin/carddisp.pl?gene=MB
PPARGC1B	PPARG Coactivator 1 Beta	Protein Coding	36	GC05P149730	2.91452	https://www.genecards.org/cgi-bin/carddisp.pl?gene=PPARGC1B
KLF4	Kruppel Like Factor 4	Protein Coding	46	GC09M107484	2.91106	https://www.genecards.org/cgi-bin/carddisp.pl?gene=KLF4
LINC00689	Long Intergenic Non-Protein Coding RNA 689	RNA Gene	15	GC07P159006	2.90199	https://www.genecards.org/cgi-bin/carddisp.pl?gene=LINC00689
LINC00538	Long Intergenic Non-Protein Coding RNA 538	RNA Gene	11	GC01P213924	2.90199	https://www.genecards.org/cgi-bin/carddisp.pl?gene=LINC00538
NACC1	Nucleus Accumbens Associated 1	Protein Coding	41	GC19P013117	2.88979	https://www.genecards.org/cgi-bin/carddisp.pl?gene=NACC1
MIR206	MicroRNA 206	RNA Gene	20	GC06P052144	2.88979	https://www.genecards.org/cgi-bin/carddisp.pl?gene=MIR206
NDUFS4	NADH:Ubiquinone Oxidoreductase Subunit S4	Protein Coding	45	GC05P053560	2.88736	https://www.genecards.org/cgi-bin/carddisp.pl?gene=NDUFS4
ALDH3A1	Aldehyde Dehydrogenase 3 Family Member A1	Protein Coding	45	GC17M019737	2.87866	https://www.genecards.org/cgi-bin/carddisp.pl?gene=ALDH3A1
ANXA5	Annexin A5	Protein Coding	47	GC04M121667	2.86271	https://www.genecards.org/cgi-bin/carddisp.pl?gene=ANXA5
TRIM21	Tripartite Motif Containing 21	Protein Coding	43	GC11M004384	2.86032	https://www.genecards.org/cgi-bin/carddisp.pl?gene=TRIM21
FAS	Fas Cell Surface Death Receptor	Protein Coding	51	GC10P088969	2.84502	https://www.genecards.org/cgi-bin/carddisp.pl?gene=FAS
CFL1	Cofilin 1	Protein Coding	47	GC11M065823	2.84502	https://www.genecards.org/cgi-bin/carddisp.pl?gene=CFL1
MIR7-1	MicroRNA 7-1	RNA Gene	18	GC09M084476	2.83629	https://www.genecards.org/cgi-bin/carddisp.pl?gene=MIR7-1
MIR7-3	MicroRNA 7-3	RNA Gene	17	GC19P004770	2.83629	https://www.genecards.org/cgi-bin/carddisp.pl?gene=MIR7-3
MIR7-2	MicroRNA 7-2	RNA Gene	16	GC15P088611	2.83629	https://www.genecards.org/cgi-bin/carddisp.pl?gene=MIR7-2
CD28	CD28 Molecule	Protein Coding	48	GC02P203706	2.82672	https://www.genecards.org/cgi-bin/carddisp.pl?gene=CD28
MIR338	MicroRNA 338	RNA Gene	17	GC17M081126	2.82672	https://www.genecards.org/cgi-bin/carddisp.pl?gene=MIR338
EIF6	Eukaryotic Translation Initiation Factor 6	Protein Coding	41	GC20M035278	2.81503	https://www.genecards.org/cgi-bin/carddisp.pl?gene=EIF6
IL6	Interleukin 6	Protein Coding	50	GC07P022725	2.80677	https://www.genecards.org/cgi-bin/carddisp.pl?gene=IL6
LONP1	Lon Peptidase 1, Mitochondrial	Protein Coding	44	GC19M005691	2.80474	https://www.genecards.org/cgi-bin/carddisp.pl?gene=LONP1
RPL6	Ribosomal Protein L6	Protein Coding	41	GC12M112320	2.8036	https://www.genecards.org/cgi-bin/carddisp.pl?gene=RPL6
PNP	Purine Nucleoside Phosphorylase	Protein Coding	48	GC14P020468	2.80045	https://www.genecards.org/cgi-bin/carddisp.pl?gene=PNP
TCF7L2	Transcription Factor 7 Like 2	Protein Coding	46	GC10P112950	2.79178	https://www.genecards.org/cgi-bin/carddisp.pl?gene=TCF7L2
YWHAE	Tyrosine 3-Monooxygenase/Tryptophan 5-Monooxygenase Activation Protein Epsilon	Protein Coding	50	GC17M001346	2.79046	https://www.genecards.org/cgi-bin/carddisp.pl?gene=YWHAE
CDH2	Cadherin 2	Protein Coding	53	GC18M027950	2.78904	https://www.genecards.org/cgi-bin/carddisp.pl?gene=CDH2
LTF	Lactotransferrin	Protein Coding	45	GC03M046435	2.78904	https://www.genecards.org/cgi-bin/carddisp.pl?gene=LTF
UGCG	UDP-Glucose Ceramide Glucosyltransferase	Protein Coding	43	GC09P111896	2.78904	https://www.genecards.org/cgi-bin/carddisp.pl?gene=UGCG
MIR135B	MicroRNA 135b	RNA Gene	19	GC01M205448	2.78904	https://www.genecards.org/cgi-bin/carddisp.pl?gene=MIR135B
ODC1-DT	ODC1 Divergent Transcript	RNA Gene	10	GC02P010450	2.78904	https://www.genecards.org/cgi-bin/carddisp.pl?gene=ODC1-DT
ATM	ATM Serine/Threonine Kinase	Protein Coding	54	GC11P108222	2.78727	https://www.genecards.org/cgi-bin/carddisp.pl?gene=ATM
KL	Klotho	Protein Coding	46	GC13P033016	2.77483	https://www.genecards.org/cgi-bin/carddisp.pl?gene=KL
PIM1	Pim-1 Proto-Oncogene, Serine/Threonine Kinase	Protein Coding	52	GC06P049529	2.77098	https://www.genecards.org/cgi-bin/carddisp.pl?gene=PIM1
PGM1	Phosphoglucomutase 1	Protein Coding	49	GC01P063593	2.76344	https://www.genecards.org/cgi-bin/carddisp.pl?gene=PGM1
SLC4A1	Solute Carrier Family 4 Member 1 (Diego Blood Group)	Protein Coding	48	GC17M044302	2.76266	https://www.genecards.org/cgi-bin/carddisp.pl?gene=SLC4A1
MIR199A1	MicroRNA 199a-1	RNA Gene	19	GC19M010817	2.76266	https://www.genecards.org/cgi-bin/carddisp.pl?gene=MIR199A1
MIRLET7A1	MicroRNA Let-7a-1	RNA Gene	21	GC09P094175	2.74953	https://www.genecards.org/cgi-bin/carddisp.pl?gene=MIRLET7A1
SLC5A1	Solute Carrier Family 5 Member 1	Protein Coding	50	GC22P032043	2.736	https://www.genecards.org/cgi-bin/carddisp.pl?gene=SLC5A1
NCL	Nucleolin	Protein Coding	43	GC02M231453	2.736	https://www.genecards.org/cgi-bin/carddisp.pl?gene=NCL
HNRNPF	Heterogeneous Nuclear Ribonucleoprotein F	Protein Coding	41	GC10M043385	2.736	https://www.genecards.org/cgi-bin/carddisp.pl?gene=HNRNPF
NOS2	Nitric Oxide Synthase 2	Protein Coding	50	GC17M027756	2.73262	https://www.genecards.org/cgi-bin/carddisp.pl?gene=NOS2
GSTP1	Glutathione S-Transferase Pi 1	Protein Coding	51	GC11P067583	2.73192	https://www.genecards.org/cgi-bin/carddisp.pl?gene=GSTP1
ATP5F1E	ATP Synthase F1 Subunit Epsilon	Protein Coding	32	GC20M059026	2.72778	https://www.genecards.org/cgi-bin/carddisp.pl?gene=ATP5F1E
HSPB2	Heat Shock Protein Family B (Small) Member 2	Protein Coding	41	GC11P111913	2.72331	https://www.genecards.org/cgi-bin/carddisp.pl?gene=HSPB2
MAPK14	Mitogen-Activated Protein Kinase 14	Protein Coding	53	GC06P049507	2.71642	https://www.genecards.org/cgi-bin/carddisp.pl?gene=MAPK14
CYCS	Cytochrome C, Somatic	Protein Coding	49	GC07M025118	2.69818	https://www.genecards.org/cgi-bin/carddisp.pl?gene=CYCS
HDAC2	Histone Deacetylase 2	Protein Coding	52	GC06M113933	2.69548	https://www.genecards.org/cgi-bin/carddisp.pl?gene=HDAC2
SFN	Stratifin	Protein Coding	47	GC01P026874	2.69548	https://www.genecards.org/cgi-bin/carddisp.pl?gene=SFN
LMNA	Lamin A/C	Protein Coding	49	GC01P156082	2.69194	https://www.genecards.org/cgi-bin/carddisp.pl?gene=LMNA
HSP90AB1	Heat Shock Protein 90 Alpha Family Class B Member 1	Protein Coding	46	GC06P044246	2.69194	https://www.genecards.org/cgi-bin/carddisp.pl?gene=HSP90AB1
KDM3A	Lysine Demethylase 3A	Protein Coding	42	GC02P086440	2.67386	https://www.genecards.org/cgi-bin/carddisp.pl?gene=KDM3A
ATP6V1E1	ATPase H+ Transporting V1 Subunit E1	Protein Coding	45	GC22M017592	2.66815	https://www.genecards.org/cgi-bin/carddisp.pl?gene=ATP6V1E1
PFKFB1	6-Phosphofructo-2-Kinase/Fructose-2,6-Biphosphatase 1	Protein Coding	43	GC0XM054932	2.6656	https://www.genecards.org/cgi-bin/carddisp.pl?gene=PFKFB1
PHB2	Prohibitin 2	Protein Coding	42	GC12M006965	2.66144	https://www.genecards.org/cgi-bin/carddisp.pl?gene=PHB2
STK11	Serine/Threonine Kinase 11	Protein Coding	50	GC19P001177	2.6607	https://www.genecards.org/cgi-bin/carddisp.pl?gene=STK11
PTPA	Protein Phosphatase 2 Phosphatase Activator	Protein Coding	36	GC09P129111	2.65667	https://www.genecards.org/cgi-bin/carddisp.pl?gene=PTPA
ANXA2	Annexin A2	Protein Coding	49	GC15M060347	2.65305	https://www.genecards.org/cgi-bin/carddisp.pl?gene=ANXA2
BECN1	Beclin 1	Protein Coding	47	GC17M042810	2.64931	https://www.genecards.org/cgi-bin/carddisp.pl?gene=BECN1
NF2	Neurofibromin 2	Protein Coding	50	GC22P029603	2.6348	https://www.genecards.org/cgi-bin/carddisp.pl?gene=NF2
YWHAH	Tyrosine 3-Monooxygenase/Tryptophan 5-Monooxygenase Activation Protein Eta	Protein Coding	49	GC22P031944	2.6348	https://www.genecards.org/cgi-bin/carddisp.pl?gene=YWHAH
YWHAQ	Tyrosine 3-Monooxygenase/Tryptophan 5-Monooxygenase Activation Protein Theta	Protein Coding	48	GC02M009583	2.6348	https://www.genecards.org/cgi-bin/carddisp.pl?gene=YWHAQ
RTN4	Reticulon 4	Protein Coding	45	GC02M054934	2.6348	https://www.genecards.org/cgi-bin/carddisp.pl?gene=RTN4
DDX58	DExD/H-Box Helicase 58	Protein Coding	47	GC09M032455	2.63101	https://www.genecards.org/cgi-bin/carddisp.pl?gene=DDX58
CDK2	Cyclin Dependent Kinase 2	Protein Coding	53	GC12P055966	2.62054	https://www.genecards.org/cgi-bin/carddisp.pl?gene=CDK2
FOXP3	Forkhead Box P3	Protein Coding	47	GC0XM049250	2.62054	https://www.genecards.org/cgi-bin/carddisp.pl?gene=FOXP3
XBP1	X-Box Binding Protein 1	Protein Coding	46	GC22M028794	2.62054	https://www.genecards.org/cgi-bin/carddisp.pl?gene=XBP1
PRMT5	Protein Arginine Methyltransferase 5	Protein Coding	43	GC14M022920	2.62054	https://www.genecards.org/cgi-bin/carddisp.pl?gene=PRMT5
MT-CO2	Mitochondrially Encoded Cytochrome C Oxidase II	Protein Coding	34	GCMTP007587	2.62054	https://www.genecards.org/cgi-bin/carddisp.pl?gene=MT-CO2
LATS1	Large Tumor Suppressor Kinase 1	Protein Coding	46	GC06M149658	2.58907	https://www.genecards.org/cgi-bin/carddisp.pl?gene=LATS1
PTPN14	Protein Tyrosine Phosphatase Non-Receptor Type 14	Protein Coding	45	GC01M214348	2.58907	https://www.genecards.org/cgi-bin/carddisp.pl?gene=PTPN14
HSPA4	Heat Shock Protein Family A (Hsp70) Member 4	Protein Coding	43	GC05P133051	2.58907	https://www.genecards.org/cgi-bin/carddisp.pl?gene=HSPA4
TEAD4	TEA Domain Transcription Factor 4	Protein Coding	43	GC12P002959	2.58907	https://www.genecards.org/cgi-bin/carddisp.pl?gene=TEAD4
MIR378A	MicroRNA 378a	RNA Gene	19	GC05P149732	2.58907	https://www.genecards.org/cgi-bin/carddisp.pl?gene=MIR378A
WNT5A	Wnt Family Member 5A	Protein Coding	50	GC03M055465	2.58505	https://www.genecards.org/cgi-bin/carddisp.pl?gene=WNT5A
ADORA1	Adenosine A1 Receptor	Protein Coding	48	GC01P203090	2.58505	https://www.genecards.org/cgi-bin/carddisp.pl?gene=ADORA1
SLC25A6	Solute Carrier Family 25 Member 6	Protein Coding	44	GC0XM001386	2.58505	https://www.genecards.org/cgi-bin/carddisp.pl?gene=SLC25A6
KISS1	KiSS-1 Metastasis Suppressor	Protein Coding	42	GC01M204190	2.58505	https://www.genecards.org/cgi-bin/carddisp.pl?gene=KISS1
NR1H4	Nuclear Receptor Subfamily 1 Group H Member 4	Protein Coding	49	GC12P100473	2.57733	https://www.genecards.org/cgi-bin/carddisp.pl?gene=NR1H4
VCP	Valosin Containing Protein	Protein Coding	49	GC09M035056	2.57217	https://www.genecards.org/cgi-bin/carddisp.pl?gene=VCP
SREBF1	Sterol Regulatory Element Binding Transcription Factor 1	Protein Coding	46	GC17M017810	2.57076	https://www.genecards.org/cgi-bin/carddisp.pl?gene=SREBF1
MIR200B	MicroRNA 200b	RNA Gene	20	GC01P001167	2.55382	https://www.genecards.org/cgi-bin/carddisp.pl?gene=MIR200B
ATP5IF1	ATP Synthase Inhibitory Factor Subunit 1	Protein Coding	31	GC01P028237	2.5506	https://www.genecards.org/cgi-bin/carddisp.pl?gene=ATP5IF1
ALB	Albumin	Protein Coding	50	GC04P073397	2.53621	https://www.genecards.org/cgi-bin/carddisp.pl?gene=ALB
PRKCE	Protein Kinase C Epsilon	Protein Coding	50	GC02P045651	2.53621	https://www.genecards.org/cgi-bin/carddisp.pl?gene=PRKCE
ZEB1	Zinc Finger E-Box Binding Homeobox 1	Protein Coding	49	GC10P031318	2.53621	https://www.genecards.org/cgi-bin/carddisp.pl?gene=ZEB1
PML	PML Nuclear Body Scaffold	Protein Coding	47	GC15P073994	2.53621	https://www.genecards.org/cgi-bin/carddisp.pl?gene=PML
TRAF6	TNF Receptor Associated Factor 6	Protein Coding	47	GC11M036467	2.53621	https://www.genecards.org/cgi-bin/carddisp.pl?gene=TRAF6
NONO	Non-POU Domain Containing Octamer Binding	Protein Coding	46	GC0XP071255	2.53621	https://www.genecards.org/cgi-bin/carddisp.pl?gene=NONO
SKP1	S-Phase Kinase Associated Protein 1	Protein Coding	44	GC05M134148	2.53621	https://www.genecards.org/cgi-bin/carddisp.pl?gene=SKP1
TOP1MT	DNA Topoisomerase I Mitochondrial	Protein Coding	42	GC08M143304	2.53621	https://www.genecards.org/cgi-bin/carddisp.pl?gene=TOP1MT
JUN	Jun Proto-Oncogene, AP-1 Transcription Factor Subunit	Protein Coding	50	GC01M058780	2.53541	https://www.genecards.org/cgi-bin/carddisp.pl?gene=JUN
PGAM5	PGAM Family Member 5, Mitochondrial Serine/Threonine Protein Phosphatase	Protein Coding	35	GC12P132710	2.53541	https://www.genecards.org/cgi-bin/carddisp.pl?gene=PGAM5
TARS1	Threonyl-TRNA Synthetase 1	Protein Coding	37	GC05P033441	2.53221	https://www.genecards.org/cgi-bin/carddisp.pl?gene=TARS1
INSR	Insulin Receptor	Protein Coding	55	GC19M007112	2.52664	https://www.genecards.org/cgi-bin/carddisp.pl?gene=INSR
TUBB	Tubulin Beta Class I	Protein Coding	50	GC06P049331	2.51977	https://www.genecards.org/cgi-bin/carddisp.pl?gene=TUBB
PTTG1	PTTG1 Regulator Of Sister Chromatid Separation, Securin	Protein Coding	44	GC05P160422	2.51499	https://www.genecards.org/cgi-bin/carddisp.pl?gene=PTTG1
FOXJ1	Forkhead Box J1	Protein Coding	39	GC17M076136	2.51499	https://www.genecards.org/cgi-bin/carddisp.pl?gene=FOXJ1
ABHD5	Abhydrolase Domain Containing 5, Lysophosphatidic Acid Acyltransferase	Protein Coding	46	GC03P043707	2.50279	https://www.genecards.org/cgi-bin/carddisp.pl?gene=ABHD5
UBC	Ubiquitin C	Protein Coding	44	GC12M124911	2.50279	https://www.genecards.org/cgi-bin/carddisp.pl?gene=UBC
P4HA1	Prolyl 4-Hydroxylase Subunit Alpha 1	Protein Coding	42	GC10M073007	2.50279	https://www.genecards.org/cgi-bin/carddisp.pl?gene=P4HA1
PARP14	Poly(ADP-Ribose) Polymerase Family Member 14	Protein Coding	37	GC03P122680	2.49551	https://www.genecards.org/cgi-bin/carddisp.pl?gene=PARP14
XRCC5	X-Ray Repair Cross Complementing 5	Protein Coding	45	GC02P216107	2.48094	https://www.genecards.org/cgi-bin/carddisp.pl?gene=XRCC5
ATAD3A	ATPase Family AAA Domain Containing 3A	Protein Coding	40	GC01P001658	2.48094	https://www.genecards.org/cgi-bin/carddisp.pl?gene=ATAD3A
EPRS1	Glutamyl-Prolyl-TRNA Synthetase 1	Protein Coding	37	GC01M219969	2.48094	https://www.genecards.org/cgi-bin/carddisp.pl?gene=EPRS1
ITGB1	Integrin Subunit Beta 1	Protein Coding	51	GC10M032890	2.46573	https://www.genecards.org/cgi-bin/carddisp.pl?gene=ITGB1
ZYX	Zyxin	Protein Coding	46	GC07P143381	2.46573	https://www.genecards.org/cgi-bin/carddisp.pl?gene=ZYX
MATR3	Matrin 3	Protein Coding	43	GC05P139274	2.46573	https://www.genecards.org/cgi-bin/carddisp.pl?gene=MATR3
RRBP1	Ribosome Binding Protein 1	Protein Coding	40	GC20M017613	2.46573	https://www.genecards.org/cgi-bin/carddisp.pl?gene=RRBP1
SLC11A2	Solute Carrier Family 11 Member 2	Protein Coding	48	GC12M050952	2.46096	https://www.genecards.org/cgi-bin/carddisp.pl?gene=SLC11A2
AKR1B10	Aldo-Keto Reductase Family 1 Member B10	Protein Coding	45	GC07P134527	2.46096	https://www.genecards.org/cgi-bin/carddisp.pl?gene=AKR1B10
NDUFA13	NADH:Ubiquinone Oxidoreductase Subunit A13	Protein Coding	45	GC19P019515	2.46096	https://www.genecards.org/cgi-bin/carddisp.pl?gene=NDUFA13
PER2	Period Circadian Regulator 2	Protein Coding	45	GC02M238244	2.46096	https://www.genecards.org/cgi-bin/carddisp.pl?gene=PER2
TNKS	Tankyrase	Protein Coding	45	GC08P009555	2.46096	https://www.genecards.org/cgi-bin/carddisp.pl?gene=TNKS
DEK	DEK Proto-Oncogene	Protein Coding	42	GC06M018224	2.46096	https://www.genecards.org/cgi-bin/carddisp.pl?gene=DEK
HOXA9	Homeobox A9	Protein Coding	41	GC07M027162	2.46096	https://www.genecards.org/cgi-bin/carddisp.pl?gene=HOXA9
ZFP36	ZFP36 Ring Finger Protein	Protein Coding	40	GC19P039406	2.46096	https://www.genecards.org/cgi-bin/carddisp.pl?gene=ZFP36
IGF1R	Insulin Like Growth Factor 1 Receptor	Protein Coding	56	GC15P098648	2.45954	https://www.genecards.org/cgi-bin/carddisp.pl?gene=IGF1R
YWHAG	Tyrosine 3-Monooxygenase/Tryptophan 5-Monooxygenase Activation Protein Gamma	Protein Coding	50	GC07M076327	2.44042	https://www.genecards.org/cgi-bin/carddisp.pl?gene=YWHAG
YWHAB	Tyrosine 3-Monooxygenase/Tryptophan 5-Monooxygenase Activation Protein Beta	Protein Coding	49	GC20P044885	2.44042	https://www.genecards.org/cgi-bin/carddisp.pl?gene=YWHAB
PSMC6	Proteasome 26S Subunit, ATPase 6	Protein Coding	41	GC14P052707	2.44042	https://www.genecards.org/cgi-bin/carddisp.pl?gene=PSMC6
HSPA9	Heat Shock Protein Family A (Hsp70) Member 9	Protein Coding	49	GC05M138554	2.43688	https://www.genecards.org/cgi-bin/carddisp.pl?gene=HSPA9
EDN1	Endothelin 1	Protein Coding	48	GC06P012256	2.43688	https://www.genecards.org/cgi-bin/carddisp.pl?gene=EDN1
SMAD3	SMAD Family Member 3	Protein Coding	50	GC15P067063	2.4363	https://www.genecards.org/cgi-bin/carddisp.pl?gene=SMAD3
TRPC5	Transient Receptor Potential Cation Channel Subfamily C Member 5	Protein Coding	42	GC0XM111774	2.43322	https://www.genecards.org/cgi-bin/carddisp.pl?gene=TRPC5
IKBKB	Inhibitor Of Nuclear Factor Kappa B Kinase Subunit Beta	Protein Coding	53	GC08P042271	2.4254	https://www.genecards.org/cgi-bin/carddisp.pl?gene=IKBKB
P3H3	Prolyl 3-Hydroxylase 3	Protein Coding	33	GC12P008981	2.42292	https://www.genecards.org/cgi-bin/carddisp.pl?gene=P3H3
TIMMDC1	Translocase Of Inner Mitochondrial Membrane Domain Containing 1	Protein Coding	38	GC03P119498	2.41537	https://www.genecards.org/cgi-bin/carddisp.pl?gene=TIMMDC1
PYGM	Glycogen Phosphorylase, Muscle Associated	Protein Coding	47	GC11M064746	2.41253	https://www.genecards.org/cgi-bin/carddisp.pl?gene=PYGM
CA2	Carbonic Anhydrase 2	Protein Coding	52	GC08P085463	2.40205	https://www.genecards.org/cgi-bin/carddisp.pl?gene=CA2
IRF5	Interferon Regulatory Factor 5	Protein Coding	49	GC07P128937	2.40205	https://www.genecards.org/cgi-bin/carddisp.pl?gene=IRF5
FTL	Ferritin Light Chain	Protein Coding	48	GC19P048965	2.40205	https://www.genecards.org/cgi-bin/carddisp.pl?gene=FTL
RARRES1	Retinoic Acid Receptor Responder 1	Protein Coding	41	GC03M158696	2.40205	https://www.genecards.org/cgi-bin/carddisp.pl?gene=RARRES1
MRPL40	Mitochondrial Ribosomal Protein L40	Protein Coding	38	GC22P019677	2.40205	https://www.genecards.org/cgi-bin/carddisp.pl?gene=MRPL40
IDH2	Isocitrate Dehydrogenase (NADP(+)) 2	Protein Coding	53	GC15M090083	2.39425	https://www.genecards.org/cgi-bin/carddisp.pl?gene=IDH2
PYGB	Glycogen Phosphorylase B	Protein Coding	45	GC20P025248	2.39425	https://www.genecards.org/cgi-bin/carddisp.pl?gene=PYGB
MPC2	Mitochondrial Pyruvate Carrier 2	Protein Coding	38	GC01M167916	2.38653	https://www.genecards.org/cgi-bin/carddisp.pl?gene=MPC2
DDX3X	DEAD-Box Helicase 3 X-Linked	Protein Coding	48	GC0XP041333	2.37974	https://www.genecards.org/cgi-bin/carddisp.pl?gene=DDX3X
KPNA2	Karyopherin Subunit Alpha 2	Protein Coding	46	GC17P068035	2.37974	https://www.genecards.org/cgi-bin/carddisp.pl?gene=KPNA2
PLOD2	Procollagen-Lysine,2-Oxoglutarate 5-Dioxygenase 2	Protein Coding	46	GC03M146069	2.37974	https://www.genecards.org/cgi-bin/carddisp.pl?gene=PLOD2
PSMD2	Proteasome 26S Subunit, Non-ATPase 2	Protein Coding	44	GC03P184298	2.37974	https://www.genecards.org/cgi-bin/carddisp.pl?gene=PSMD2
EIF4B	Eukaryotic Translation Initiation Factor 4B	Protein Coding	43	GC12P053006	2.37974	https://www.genecards.org/cgi-bin/carddisp.pl?gene=EIF4B
RBBP7	RB Binding Protein 7, Chromatin Remodeling Factor	Protein Coding	42	GC0XM016839	2.37974	https://www.genecards.org/cgi-bin/carddisp.pl?gene=RBBP7
TUBB6	Tubulin Beta 6 Class V	Protein Coding	42	GC18P012307	2.37974	https://www.genecards.org/cgi-bin/carddisp.pl?gene=TUBB6
CXCL8	C-X-C Motif Chemokine Ligand 8	Protein Coding	42	GC04P073740	2.37595	https://www.genecards.org/cgi-bin/carddisp.pl?gene=CXCL8
BNIP3	BCL2 Interacting Protein 3	Protein Coding	43	GC10M131966	2.37166	https://www.genecards.org/cgi-bin/carddisp.pl?gene=BNIP3
CDKN1A	Cyclin Dependent Kinase Inhibitor 1A	Protein Coding	50	GC06P049517	2.36549	https://www.genecards.org/cgi-bin/carddisp.pl?gene=CDKN1A
PDPK1	3-Phosphoinositide Dependent Protein Kinase 1	Protein Coding	50	GC16P002537	2.36549	https://www.genecards.org/cgi-bin/carddisp.pl?gene=PDPK1
SLC29A1	Solute Carrier Family 29 Member 1 (Augustine Blood Group)	Protein Coding	49	GC06P044219	2.36549	https://www.genecards.org/cgi-bin/carddisp.pl?gene=SLC29A1
TNFSF10	TNF Superfamily Member 10	Protein Coding	47	GC03M172505	2.36549	https://www.genecards.org/cgi-bin/carddisp.pl?gene=TNFSF10
PRKAR2B	Protein Kinase CAMP-Dependent Type II Regulatory Subunit Beta	Protein Coding	46	GC07P107044	2.36549	https://www.genecards.org/cgi-bin/carddisp.pl?gene=PRKAR2B
NDUFS2	NADH:Ubiquinone Oxidoreductase Core Subunit S2	Protein Coding	46	GC01P161197	2.36133	https://www.genecards.org/cgi-bin/carddisp.pl?gene=NDUFS2
ACSS2	Acyl-CoA Synthetase Short Chain Family Member 2	Protein Coding	45	GC20P034873	2.36016	https://www.genecards.org/cgi-bin/carddisp.pl?gene=ACSS2
ANGPT2	Angiopoietin 2	Protein Coding	46	GC08M006499	2.35915	https://www.genecards.org/cgi-bin/carddisp.pl?gene=ANGPT2
CAD	Carbamoyl-Phosphate Synthetase 2, Aspartate Transcarbamylase, And Dihydroorotase	Protein Coding	51	GC02P027217	2.33401	https://www.genecards.org/cgi-bin/carddisp.pl?gene=CAD
MYH10	Myosin Heavy Chain 10	Protein Coding	47	GC17M008474	2.33401	https://www.genecards.org/cgi-bin/carddisp.pl?gene=MYH10
THBS1	Thrombospondin 1	Protein Coding	46	GC15P039581	2.33401	https://www.genecards.org/cgi-bin/carddisp.pl?gene=THBS1
CCT5	Chaperonin Containing TCP1 Subunit 5	Protein Coding	45	GC05P010236	2.33401	https://www.genecards.org/cgi-bin/carddisp.pl?gene=CCT5
RPL15	Ribosomal Protein L15	Protein Coding	45	GC03P023916	2.33401	https://www.genecards.org/cgi-bin/carddisp.pl?gene=RPL15
STIP1	Stress Induced Phosphoprotein 1	Protein Coding	45	GC11P064187	2.33401	https://www.genecards.org/cgi-bin/carddisp.pl?gene=STIP1
HSPH1	Heat Shock Protein Family H (Hsp110) Member 1	Protein Coding	44	GC13M031134	2.33401	https://www.genecards.org/cgi-bin/carddisp.pl?gene=HSPH1
RPL19	Ribosomal Protein L19	Protein Coding	43	GC17P039200	2.33401	https://www.genecards.org/cgi-bin/carddisp.pl?gene=RPL19
RPL9	Ribosomal Protein L9	Protein Coding	43	GC04M039452	2.33401	https://www.genecards.org/cgi-bin/carddisp.pl?gene=RPL9
RPL13A	Ribosomal Protein L13a	Protein Coding	43	GC19P049487	2.33401	https://www.genecards.org/cgi-bin/carddisp.pl?gene=RPL13A
PAICS	Phosphoribosylaminoimidazole Carboxylase And Phosphoribosylaminoimidazolesuccinocarboxamide Synthase	Protein Coding	43	GC04P056435	2.33401	https://www.genecards.org/cgi-bin/carddisp.pl?gene=PAICS
PSMC5	Proteasome 26S Subunit, ATPase 5	Protein Coding	43	GC17P063827	2.33401	https://www.genecards.org/cgi-bin/carddisp.pl?gene=PSMC5
CYFIP1	Cytoplasmic FMR1 Interacting Protein 1	Protein Coding	42	GC15M022867	2.33401	https://www.genecards.org/cgi-bin/carddisp.pl?gene=CYFIP1
MAP4	Microtubule Associated Protein 4	Protein Coding	42	GC03M047850	2.33401	https://www.genecards.org/cgi-bin/carddisp.pl?gene=MAP4
UPF1	UPF1 RNA Helicase And ATPase	Protein Coding	42	GC19P018831	2.33401	https://www.genecards.org/cgi-bin/carddisp.pl?gene=UPF1
IPO5	Importin 5	Protein Coding	41	GC13P097953	2.33401	https://www.genecards.org/cgi-bin/carddisp.pl?gene=IPO5
PSMC2	Proteasome 26S Subunit, ATPase 2	Protein Coding	41	GC07P103344	2.33401	https://www.genecards.org/cgi-bin/carddisp.pl?gene=PSMC2
SLC9A3R2	SLC9A3 Regulator 2	Protein Coding	41	GC16P002508	2.33401	https://www.genecards.org/cgi-bin/carddisp.pl?gene=SLC9A3R2
SFXN1	Sideroflexin 1	Protein Coding	40	GC05P175477	2.33401	https://www.genecards.org/cgi-bin/carddisp.pl?gene=SFXN1
RPS4X	Ribosomal Protein S4 X-Linked	Protein Coding	40	GC0XM072255	2.33401	https://www.genecards.org/cgi-bin/carddisp.pl?gene=RPS4X
YBX1	Y-Box Binding Protein 1	Protein Coding	40	GC01P042682	2.33401	https://www.genecards.org/cgi-bin/carddisp.pl?gene=YBX1
TRIP6	Thyroid Hormone Receptor Interactor 6	Protein Coding	40	GC07P100867	2.33401	https://www.genecards.org/cgi-bin/carddisp.pl?gene=TRIP6
FAM120A	Family With Sequence Similarity 120A	Protein Coding	38	GC09P093548	2.33401	https://www.genecards.org/cgi-bin/carddisp.pl?gene=FAM120A
RPSA	Ribosomal Protein SA	Protein Coding	45	GC03P039406	2.32999	https://www.genecards.org/cgi-bin/carddisp.pl?gene=RPSA
SFPQ	Splicing Factor Proline And Glutamine Rich	Protein Coding	44	GC01M035176	2.32999	https://www.genecards.org/cgi-bin/carddisp.pl?gene=SFPQ
MIR148B	MicroRNA 148b	RNA Gene	19	GC12P054337	2.32999	https://www.genecards.org/cgi-bin/carddisp.pl?gene=MIR148B
HIPK2	Homeodomain Interacting Protein Kinase 2	Protein Coding	46	GC07M139561	2.30937	https://www.genecards.org/cgi-bin/carddisp.pl?gene=HIPK2
ACTA2	Actin Alpha 2, Smooth Muscle	Protein Coding	49	GC10M088935	2.30707	https://www.genecards.org/cgi-bin/carddisp.pl?gene=ACTA2
RYR1	Ryanodine Receptor 1	Protein Coding	47	GC19P038809	2.30707	https://www.genecards.org/cgi-bin/carddisp.pl?gene=RYR1
KDM4A	Lysine Demethylase 4A	Protein Coding	42	GC01P043650	2.30707	https://www.genecards.org/cgi-bin/carddisp.pl?gene=KDM4A
CIRBP	Cold Inducible RNA Binding Protein	Protein Coding	39	GC19P001259	2.30707	https://www.genecards.org/cgi-bin/carddisp.pl?gene=CIRBP
CCAR2	Cell Cycle And Apoptosis Regulator 2	Protein Coding	38	GC08P022604	2.30707	https://www.genecards.org/cgi-bin/carddisp.pl?gene=CCAR2
SLC16A3	Solute Carrier Family 16 Member 3	Protein Coding	45	GC17P082217	2.303	https://www.genecards.org/cgi-bin/carddisp.pl?gene=SLC16A3
CHUK	Component Of Inhibitor Of Nuclear Factor Kappa B Kinase Complex	Protein Coding	53	GC10M100188	2.28115	https://www.genecards.org/cgi-bin/carddisp.pl?gene=CHUK
ADK	Adenosine Kinase	Protein Coding	52	GC10P074152	2.28115	https://www.genecards.org/cgi-bin/carddisp.pl?gene=ADK
AHR	Aryl Hydrocarbon Receptor	Protein Coding	49	GC07P016916	2.28115	https://www.genecards.org/cgi-bin/carddisp.pl?gene=AHR
CBX3	Chromobox 3	Protein Coding	44	GC07P026201	2.28115	https://www.genecards.org/cgi-bin/carddisp.pl?gene=CBX3
ELAVL1	ELAV Like RNA Binding Protein 1	Protein Coding	43	GC19M007958	2.28115	https://www.genecards.org/cgi-bin/carddisp.pl?gene=ELAVL1
GNB2	G Protein Subunit Beta 2	Protein Coding	43	GC07P100673	2.28115	https://www.genecards.org/cgi-bin/carddisp.pl?gene=GNB2
SMURF2	SMAD Specific E3 Ubiquitin Protein Ligase 2	Protein Coding	43	GC17M064542	2.28115	https://www.genecards.org/cgi-bin/carddisp.pl?gene=SMURF2
NOX1	NADPH Oxidase 1	Protein Coding	42	GC0XM100843	2.28115	https://www.genecards.org/cgi-bin/carddisp.pl?gene=NOX1
NR4A1	Nuclear Receptor Subfamily 4 Group A Member 1	Protein Coding	47	GC12P052022	2.25994	https://www.genecards.org/cgi-bin/carddisp.pl?gene=NR4A1
COPS5	COP9 Signalosome Subunit 5	Protein Coding	43	GC08M067043	2.25994	https://www.genecards.org/cgi-bin/carddisp.pl?gene=COPS5
PTP4A3	Protein Tyrosine Phosphatase 4A3	Protein Coding	42	GC08P141391	2.25994	https://www.genecards.org/cgi-bin/carddisp.pl?gene=PTP4A3
NDRG2	NDRG Family Member 2	Protein Coding	39	GC14M021016	2.25994	https://www.genecards.org/cgi-bin/carddisp.pl?gene=NDRG2
HNF4A	Hepatocyte Nuclear Factor 4 Alpha	Protein Coding	52	GC20P044355	2.24754	https://www.genecards.org/cgi-bin/carddisp.pl?gene=HNF4A
PTK2	Protein Tyrosine Kinase 2	Protein Coding	49	GC08M140657	2.23663	https://www.genecards.org/cgi-bin/carddisp.pl?gene=PTK2
TSC1	TSC Complex Subunit 1	Protein Coding	49	GC09M132891	2.23663	https://www.genecards.org/cgi-bin/carddisp.pl?gene=TSC1
KDM4D	Lysine Demethylase 4D	Protein Coding	39	GC11P094973	2.23663	https://www.genecards.org/cgi-bin/carddisp.pl?gene=KDM4D
LINC00184	Long Intergenic Non-Protein Coding RNA 184	RNA Gene	16	GC01P234616	2.23663	https://www.genecards.org/cgi-bin/carddisp.pl?gene=LINC00184
APBA3	Amyloid Beta Precursor Protein Binding Family A Member 3	Protein Coding	39	GC19M003750	2.23545	https://www.genecards.org/cgi-bin/carddisp.pl?gene=APBA3
NAMPT	Nicotinamide Phosphoribosyltransferase	Protein Coding	49	GC07M106248	2.23298	https://www.genecards.org/cgi-bin/carddisp.pl?gene=NAMPT
GFAP	Glial Fibrillary Acidic Protein	Protein Coding	48	GC17M044905	2.22721	https://www.genecards.org/cgi-bin/carddisp.pl?gene=GFAP
CARM1	Coactivator Associated Arginine Methyltransferase 1	Protein Coding	47	GC19P010871	2.22721	https://www.genecards.org/cgi-bin/carddisp.pl?gene=CARM1
SQLE	Squalene Epoxidase	Protein Coding	45	GC08P124998	2.22721	https://www.genecards.org/cgi-bin/carddisp.pl?gene=SQLE
MTHFD2	Methylenetetrahydrofolate Dehydrogenase (NADP+ Dependent) 2, Methenyltetrahydrofolate Cyclohydrolase	Protein Coding	43	GC02P074186	2.22721	https://www.genecards.org/cgi-bin/carddisp.pl?gene=MTHFD2
HKDC1	Hexokinase Domain Containing 1	Protein Coding	42	GC10P069220	2.22472	https://www.genecards.org/cgi-bin/carddisp.pl?gene=HKDC1
ADA	Adenosine Deaminase	Protein Coding	52	GC20M044620	2.21369	https://www.genecards.org/cgi-bin/carddisp.pl?gene=ADA
UCP1	Uncoupling Protein 1	Protein Coding	45	GC04M140559	2.21369	https://www.genecards.org/cgi-bin/carddisp.pl?gene=UCP1
CFLAR	CASP8 And FADD Like Apoptosis Regulator	Protein Coding	47	GC02P201117	2.21067	https://www.genecards.org/cgi-bin/carddisp.pl?gene=CFLAR
TK1	Thymidine Kinase 1	Protein Coding	47	GC17M078175	2.21067	https://www.genecards.org/cgi-bin/carddisp.pl?gene=TK1
USP15	Ubiquitin Specific Peptidase 15	Protein Coding	47	GC12P062260	2.21067	https://www.genecards.org/cgi-bin/carddisp.pl?gene=USP15
IGFBP7	Insulin Like Growth Factor Binding Protein 7	Protein Coding	46	GC04M057030	2.21067	https://www.genecards.org/cgi-bin/carddisp.pl?gene=IGFBP7
LATS2	Large Tumor Suppressor Kinase 2	Protein Coding	46	GC13M020973	2.21067	https://www.genecards.org/cgi-bin/carddisp.pl?gene=LATS2
MVD	Mevalonate Diphosphate Decarboxylase	Protein Coding	46	GC16M088651	2.21067	https://www.genecards.org/cgi-bin/carddisp.pl?gene=MVD
PSMB4	Proteasome 20S Subunit Beta 4	Protein Coding	46	GC01P151372	2.21067	https://www.genecards.org/cgi-bin/carddisp.pl?gene=PSMB4
SNRPB	Small Nuclear Ribonucleoprotein Polypeptides B And B1	Protein Coding	46	GC20M002461	2.21067	https://www.genecards.org/cgi-bin/carddisp.pl?gene=SNRPB
RAN	RAN, Member RAS Oncogene Family	Protein Coding	46	GC12P130871	2.21067	https://www.genecards.org/cgi-bin/carddisp.pl?gene=RAN
TMPO	Thymopoietin	Protein Coding	46	GC12P098515	2.21067	https://www.genecards.org/cgi-bin/carddisp.pl?gene=TMPO
CDC20	Cell Division Cycle 20	Protein Coding	45	GC01P043358	2.21067	https://www.genecards.org/cgi-bin/carddisp.pl?gene=CDC20
ARID1A	AT-Rich Interaction Domain 1A	Protein Coding	45	GC01P026693	2.21067	https://www.genecards.org/cgi-bin/carddisp.pl?gene=ARID1A
RPL21	Ribosomal Protein L21	Protein Coding	45	GC13P027251	2.21067	https://www.genecards.org/cgi-bin/carddisp.pl?gene=RPL21
RPL18	Ribosomal Protein L18	Protein Coding	45	GC19M048615	2.21067	https://www.genecards.org/cgi-bin/carddisp.pl?gene=RPL18
PSMA5	Proteasome 20S Subunit Alpha 5	Protein Coding	45	GC01M109399	2.21067	https://www.genecards.org/cgi-bin/carddisp.pl?gene=PSMA5
MPDZ	Multiple PDZ Domain Crumbs Cell Polarity Complex Component	Protein Coding	45	GC09M013095	2.21067	https://www.genecards.org/cgi-bin/carddisp.pl?gene=MPDZ
NUMA1	Nuclear Mitotic Apparatus Protein 1	Protein Coding	45	GC11M072002	2.21067	https://www.genecards.org/cgi-bin/carddisp.pl?gene=NUMA1
XRN2	5'-3' Exoribonuclease 2	Protein Coding	44	GC20P021303	2.21067	https://www.genecards.org/cgi-bin/carddisp.pl?gene=XRN2
COPA	COPI Coat Complex Subunit Alpha	Protein Coding	43	GC01M160288	2.21067	https://www.genecards.org/cgi-bin/carddisp.pl?gene=COPA
RPL10A	Ribosomal Protein L10a	Protein Coding	43	GC06P049495	2.21067	https://www.genecards.org/cgi-bin/carddisp.pl?gene=RPL10A
RPL7A	Ribosomal Protein L7a	Protein Coding	43	GC09P133348	2.21067	https://www.genecards.org/cgi-bin/carddisp.pl?gene=RPL7A
PA2G4	Proliferation-Associated 2G4	Protein Coding	43	GC12P056216	2.21067	https://www.genecards.org/cgi-bin/carddisp.pl?gene=PA2G4
TP53BP2	Tumor Protein P53 Binding Protein 2	Protein Coding	43	GC01M223779	2.21067	https://www.genecards.org/cgi-bin/carddisp.pl?gene=TP53BP2
DPF2	Double PHD Fingers 2	Protein Coding	42	GC11P065351	2.21067	https://www.genecards.org/cgi-bin/carddisp.pl?gene=DPF2
HMGB3	High Mobility Group Box 3	Protein Coding	42	GC0XP150980	2.21067	https://www.genecards.org/cgi-bin/carddisp.pl?gene=HMGB3
STK25	Serine/Threonine Kinase 25	Protein Coding	42	GC02M241492	2.21067	https://www.genecards.org/cgi-bin/carddisp.pl?gene=STK25
RBM10	RNA Binding Motif Protein 10	Protein Coding	42	GC0XP047167	2.21067	https://www.genecards.org/cgi-bin/carddisp.pl?gene=RBM10
HNRNPR	Heterogeneous Nuclear Ribonucleoprotein R	Protein Coding	41	GC01M023303	2.21067	https://www.genecards.org/cgi-bin/carddisp.pl?gene=HNRNPR
RPL24	Ribosomal Protein L24	Protein Coding	41	GC03M101681	2.21067	https://www.genecards.org/cgi-bin/carddisp.pl?gene=RPL24
PSMD6	Proteasome 26S Subunit, Non-ATPase 6	Protein Coding	41	GC03M063973	2.21067	https://www.genecards.org/cgi-bin/carddisp.pl?gene=PSMD6
PDLIM7	PDZ And LIM Domain 7	Protein Coding	41	GC05M177483	2.21067	https://www.genecards.org/cgi-bin/carddisp.pl?gene=PDLIM7
SV2B	Synaptic Vesicle Glycoprotein 2B	Protein Coding	41	GC15P091099	2.21067	https://www.genecards.org/cgi-bin/carddisp.pl?gene=SV2B
ZBTB18	Zinc Finger And BTB Domain Containing 18	Protein Coding	41	GC01P244048	2.21067	https://www.genecards.org/cgi-bin/carddisp.pl?gene=ZBTB18
WDR1	WD Repeat Domain 1	Protein Coding	41	GC04M010075	2.21067	https://www.genecards.org/cgi-bin/carddisp.pl?gene=WDR1
CIAPIN1	Cytokine Induced Apoptosis Inhibitor 1	Protein Coding	40	GC16M057428	2.21067	https://www.genecards.org/cgi-bin/carddisp.pl?gene=CIAPIN1
RPS8	Ribosomal Protein S8	Protein Coding	40	GC01P044775	2.21067	https://www.genecards.org/cgi-bin/carddisp.pl?gene=RPS8
SF3B3	Splicing Factor 3b Subunit 3	Protein Coding	40	GC16P070523	2.21067	https://www.genecards.org/cgi-bin/carddisp.pl?gene=SF3B3
RPL14	Ribosomal Protein L14	Protein Coding	40	GC03P040458	2.21067	https://www.genecards.org/cgi-bin/carddisp.pl?gene=RPL14
MPP5	Membrane Palmitoylated Protein 5	Protein Coding	40	GC14P067241	2.21067	https://www.genecards.org/cgi-bin/carddisp.pl?gene=MPP5
SRSF6	Serine And Arginine Rich Splicing Factor 6	Protein Coding	40	GC20P043457	2.21067	https://www.genecards.org/cgi-bin/carddisp.pl?gene=SRSF6
EIF3B	Eukaryotic Translation Initiation Factor 3 Subunit B	Protein Coding	39	GC07P002354	2.21067	https://www.genecards.org/cgi-bin/carddisp.pl?gene=EIF3B
AJUBA	Ajuba LIM Protein	Protein Coding	39	GC14M022971	2.21067	https://www.genecards.org/cgi-bin/carddisp.pl?gene=AJUBA
AMOTL1	Angiomotin Like 1	Protein Coding	39	GC11P094686	2.21067	https://www.genecards.org/cgi-bin/carddisp.pl?gene=AMOTL1
EIF3L	Eukaryotic Translation Initiation Factor 3 Subunit L	Protein Coding	39	GC22P037848	2.21067	https://www.genecards.org/cgi-bin/carddisp.pl?gene=EIF3L
HSPA4L	Heat Shock Protein Family A (Hsp70) Member 4 Like	Protein Coding	39	GC04P127781	2.21067	https://www.genecards.org/cgi-bin/carddisp.pl?gene=HSPA4L
CNN2	Calponin 2	Protein Coding	39	GC19P001026	2.21067	https://www.genecards.org/cgi-bin/carddisp.pl?gene=CNN2
LIN7C	Lin-7 Homolog C, Crumbs Cell Polarity Complex Component	Protein Coding	39	GC11M027494	2.21067	https://www.genecards.org/cgi-bin/carddisp.pl?gene=LIN7C
RPL17	Ribosomal Protein L17	Protein Coding	39	GC18M049488	2.21067	https://www.genecards.org/cgi-bin/carddisp.pl?gene=RPL17
TEAD3	TEA Domain Transcription Factor 3	Protein Coding	39	GC06M043467	2.21067	https://www.genecards.org/cgi-bin/carddisp.pl?gene=TEAD3
SUPT16H	SPT16 Homolog, Facilitates Chromatin Remodeling Subunit	Protein Coding	39	GC14M021351	2.21067	https://www.genecards.org/cgi-bin/carddisp.pl?gene=SUPT16H
TWF1	Twinfilin Actin Binding Protein 1	Protein Coding	39	GC12M043793	2.21067	https://www.genecards.org/cgi-bin/carddisp.pl?gene=TWF1
SUN2	Sad1 And UNC84 Domain Containing 2	Protein Coding	39	GC22M046248	2.21067	https://www.genecards.org/cgi-bin/carddisp.pl?gene=SUN2
DNAJC10	DnaJ Heat Shock Protein Family (Hsp40) Member C10	Protein Coding	38	GC02P182716	2.21067	https://www.genecards.org/cgi-bin/carddisp.pl?gene=DNAJC10
AHNAK	AHNAK Nucleoprotein	Protein Coding	38	GC11M063868	2.21067	https://www.genecards.org/cgi-bin/carddisp.pl?gene=AHNAK
CSTF1	Cleavage Stimulation Factor Subunit 1	Protein Coding	38	GC20P056392	2.21067	https://www.genecards.org/cgi-bin/carddisp.pl?gene=CSTF1
SEC16A	SEC16 Homolog A, Endoplasmic Reticulum Export Factor	Protein Coding	37	GC09M136440	2.21067	https://www.genecards.org/cgi-bin/carddisp.pl?gene=SEC16A
AMOTL2	Angiomotin Like 2	Protein Coding	36	GC03M134355	2.21067	https://www.genecards.org/cgi-bin/carddisp.pl?gene=AMOTL2
ADSS2	Adenylosuccinate Synthase 2	Protein Coding	36	GC01M244410	2.21067	https://www.genecards.org/cgi-bin/carddisp.pl?gene=ADSS2
FLG2	Filaggrin Family Member 2	Protein Coding	36	GC01M152321	2.21067	https://www.genecards.org/cgi-bin/carddisp.pl?gene=FLG2
MACROH2A1	MacroH2A.1 Histone	Protein Coding	36	GC05M135334	2.21067	https://www.genecards.org/cgi-bin/carddisp.pl?gene=MACROH2A1
H1-4	H1.4 Linker Histone, Cluster Member	Protein Coding	36	GC06P049174	2.21067	https://www.genecards.org/cgi-bin/carddisp.pl?gene=H1-4
HRNR	Hornerin	Protein Coding	35	GC01M152184	2.21067	https://www.genecards.org/cgi-bin/carddisp.pl?gene=HRNR
CCDC85C	Coiled-Coil Domain Containing 85C	Protein Coding	34	GC14M099500	2.21067	https://www.genecards.org/cgi-bin/carddisp.pl?gene=CCDC85C
WWC3	WWC Family Member 3	Protein Coding	34	GC0XP010015	2.21067	https://www.genecards.org/cgi-bin/carddisp.pl?gene=WWC3
H1-5	H1.5 Linker Histone, Cluster Member	Protein Coding	33	GC06M029293	2.21067	https://www.genecards.org/cgi-bin/carddisp.pl?gene=H1-5
PATJ	PATJ Crumbs Cell Polarity Complex Component	Protein Coding	32	GC01P061743	2.21067	https://www.genecards.org/cgi-bin/carddisp.pl?gene=PATJ
H1-10	H1.10 Linker Histone	Protein Coding	28	GC03M129315	2.21067	https://www.genecards.org/cgi-bin/carddisp.pl?gene=H1-10
JPT2	Jupiter Microtubule Associated Homolog 2	Protein Coding	27	GC16P001768	2.21067	https://www.genecards.org/cgi-bin/carddisp.pl?gene=JPT2
SPINDOC	Spindlin Interactor And Repressor Of Chromatin Binding	Protein Coding	24	GC11P063814	2.21067	https://www.genecards.org/cgi-bin/carddisp.pl?gene=SPINDOC
HOTTIP	HOXA Distal Transcript Antisense RNA	RNA Gene	22	GC07P027198	2.21067	https://www.genecards.org/cgi-bin/carddisp.pl?gene=HOTTIP
MIR615	MicroRNA 615	RNA Gene	20	GC12P054033	2.21067	https://www.genecards.org/cgi-bin/carddisp.pl?gene=MIR615
EEF1A1P5	Eukaryotic Translation Elongation Factor 1 Alpha 1 Pseudogene 5	Pseudogene	13	GC09P133019	2.21067	https://www.genecards.org/cgi-bin/carddisp.pl?gene=EEF1A1P5
COX10	Cytochrome C Oxidase Assembly Factor Heme A:Farnesyltransferase COX10	Protein Coding	44	GC17P014069	2.20745	https://www.genecards.org/cgi-bin/carddisp.pl?gene=COX10
ALK	ALK Receptor Tyrosine Kinase	Protein Coding	53	GC02M029190	2.2059	https://www.genecards.org/cgi-bin/carddisp.pl?gene=ALK
NRP1	Neuropilin 1	Protein Coding	47	GC10M033177	2.2059	https://www.genecards.org/cgi-bin/carddisp.pl?gene=NRP1
FDFT1	Farnesyl-Diphosphate Farnesyltransferase 1	Protein Coding	46	GC08P011795	2.2059	https://www.genecards.org/cgi-bin/carddisp.pl?gene=FDFT1
DYNC1H1	Dynein Cytoplasmic 1 Heavy Chain 1	Protein Coding	46	GC14P105011	2.2059	https://www.genecards.org/cgi-bin/carddisp.pl?gene=DYNC1H1
AGRP	Agouti Related Neuropeptide	Protein Coding	43	GC16M067482	2.2059	https://www.genecards.org/cgi-bin/carddisp.pl?gene=AGRP
GTF2I	General Transcription Factor IIi	Protein Coding	43	GC07P074658	2.2059	https://www.genecards.org/cgi-bin/carddisp.pl?gene=GTF2I
KRT7	Keratin 7	Protein Coding	43	GC12P052232	2.2059	https://www.genecards.org/cgi-bin/carddisp.pl?gene=KRT7
ONECUT1	One Cut Homeobox 1	Protein Coding	42	GC15M061447	2.2059	https://www.genecards.org/cgi-bin/carddisp.pl?gene=ONECUT1
STYK1	Serine/Threonine/Tyrosine Kinase 1	Protein Coding	42	GC12M014393	2.2059	https://www.genecards.org/cgi-bin/carddisp.pl?gene=STYK1
CCN2	Cellular Communication Network Factor 2	Protein Coding	40	GC06M131948	2.2059	https://www.genecards.org/cgi-bin/carddisp.pl?gene=CCN2
H2AC1	H2A Clustered Histone 1	Protein Coding	30	GC06M025854	2.2059	https://www.genecards.org/cgi-bin/carddisp.pl?gene=H2AC1
MIR26B	MicroRNA 26b	RNA Gene	21	GC02P218402	2.2059	https://www.genecards.org/cgi-bin/carddisp.pl?gene=MIR26B
MIR101-1	MicroRNA 101-1	RNA Gene	19	GC01M065058	2.2059	https://www.genecards.org/cgi-bin/carddisp.pl?gene=MIR101-1
MIR101-2	MicroRNA 101-2	RNA Gene	16	GC09P004863	2.2059	https://www.genecards.org/cgi-bin/carddisp.pl?gene=MIR101-2
LPAR2	Lysophosphatidic Acid Receptor 2	Protein Coding	45	GC19M019624	2.19211	https://www.genecards.org/cgi-bin/carddisp.pl?gene=LPAR2
GPR35	G Protein-Coupled Receptor 35	Protein Coding	44	GC02P240605	2.19211	https://www.genecards.org/cgi-bin/carddisp.pl?gene=GPR35
DLD	Dihydrolipoamide Dehydrogenase	Protein Coding	51	GC07P107890	2.19186	https://www.genecards.org/cgi-bin/carddisp.pl?gene=DLD
CTCF	CCCTC-Binding Factor	Protein Coding	47	GC16P067563	2.18124	https://www.genecards.org/cgi-bin/carddisp.pl?gene=CTCF
GNRH2	Gonadotropin Releasing Hormone 2	Protein Coding	35	GC20P003125	2.18124	https://www.genecards.org/cgi-bin/carddisp.pl?gene=GNRH2
FSD1	Fibronectin Type III And SPRY Domain Containing 1	Protein Coding	34	GC19P004304	2.18124	https://www.genecards.org/cgi-bin/carddisp.pl?gene=FSD1
MIR140	MicroRNA 140	RNA Gene	21	GC16P069934	2.18124	https://www.genecards.org/cgi-bin/carddisp.pl?gene=MIR140
MIR489	MicroRNA 489	RNA Gene	16	GC07M093483	2.18124	https://www.genecards.org/cgi-bin/carddisp.pl?gene=MIR489
HNF4A-AS1	HNF4A Antisense RNA 1	RNA Gene	13	GC20M044356	2.18124	https://www.genecards.org/cgi-bin/carddisp.pl?gene=HNF4A-AS1
IRS1	Insulin Receptor Substrate 1	Protein Coding	48	GC02M226731	2.17537	https://www.genecards.org/cgi-bin/carddisp.pl?gene=IRS1
IL1B	Interleukin 1 Beta	Protein Coding	49	GC02M112829	2.16953	https://www.genecards.org/cgi-bin/carddisp.pl?gene=IL1B
MET	MET Proto-Oncogene, Receptor Tyrosine Kinase	Protein Coding	55	GC07P116672	2.14699	https://www.genecards.org/cgi-bin/carddisp.pl?gene=MET
NEK2	NIMA Related Kinase 2	Protein Coding	52	GC01M211658	2.14699	https://www.genecards.org/cgi-bin/carddisp.pl?gene=NEK2
CASP1	Caspase 1	Protein Coding	51	GC11M105025	2.14699	https://www.genecards.org/cgi-bin/carddisp.pl?gene=CASP1
MAPT	Microtubule Associated Protein Tau	Protein Coding	51	GC17P045894	2.14699	https://www.genecards.org/cgi-bin/carddisp.pl?gene=MAPT
AURKB	Aurora Kinase B	Protein Coding	50	GC17M008959	2.14699	https://www.genecards.org/cgi-bin/carddisp.pl?gene=AURKB
TNFAIP3	TNF Alpha Induced Protein 3	Protein Coding	49	GC06P137866	2.14699	https://www.genecards.org/cgi-bin/carddisp.pl?gene=TNFAIP3
IFIH1	Interferon Induced With Helicase C Domain 1	Protein Coding	48	GC02M162267	2.14699	https://www.genecards.org/cgi-bin/carddisp.pl?gene=IFIH1
EIF4EBP1	Eukaryotic Translation Initiation Factor 4E Binding Protein 1	Protein Coding	47	GC08P038031	2.14699	https://www.genecards.org/cgi-bin/carddisp.pl?gene=EIF4EBP1
SLC4A4	Solute Carrier Family 4 Member 4	Protein Coding	47	GC04P071063	2.14699	https://www.genecards.org/cgi-bin/carddisp.pl?gene=SLC4A4
BIRC2	Baculoviral IAP Repeat Containing 2	Protein Coding	46	GC11P102347	2.14699	https://www.genecards.org/cgi-bin/carddisp.pl?gene=BIRC2
STS	Steroid Sulfatase	Protein Coding	46	GC0XP007146	2.14699	https://www.genecards.org/cgi-bin/carddisp.pl?gene=STS
BAG3	BAG Cochaperone 3	Protein Coding	45	GC10P119651	2.14699	https://www.genecards.org/cgi-bin/carddisp.pl?gene=BAG3
KLF5	Kruppel Like Factor 5	Protein Coding	45	GC13P073054	2.14699	https://www.genecards.org/cgi-bin/carddisp.pl?gene=KLF5
ERLIN1	ER Lipid Raft Associated 1	Protein Coding	43	GC10M100150	2.14699	https://www.genecards.org/cgi-bin/carddisp.pl?gene=ERLIN1
NEFM	Neurofilament Medium	Protein Coding	43	GC08P024913	2.14699	https://www.genecards.org/cgi-bin/carddisp.pl?gene=NEFM
EIF2S2	Eukaryotic Translation Initiation Factor 2 Subunit Beta	Protein Coding	42	GC20M034088	2.14699	https://www.genecards.org/cgi-bin/carddisp.pl?gene=EIF2S2
MRE11	MRE11 Homolog, Double Strand Break Repair Nuclease	Protein Coding	42	GC11M094636	2.14699	https://www.genecards.org/cgi-bin/carddisp.pl?gene=MRE11
ANAPC1	Anaphase Promoting Complex Subunit 1	Protein Coding	41	GC02M111611	2.14699	https://www.genecards.org/cgi-bin/carddisp.pl?gene=ANAPC1
CBY1	Chibby Family Member 1, Beta Catenin Antagonist	Protein Coding	41	GC22P038656	2.14699	https://www.genecards.org/cgi-bin/carddisp.pl?gene=CBY1
MBD1	Methyl-CpG Binding Domain Protein 1	Protein Coding	41	GC18M050266	2.14699	https://www.genecards.org/cgi-bin/carddisp.pl?gene=MBD1
DPPA4	Developmental Pluripotency Associated 4	Protein Coding	40	GC03M109326	2.14699	https://www.genecards.org/cgi-bin/carddisp.pl?gene=DPPA4
HERC5	HECT And RLD Domain Containing E3 Ubiquitin Protein Ligase 5	Protein Coding	40	GC04P088457	2.14699	https://www.genecards.org/cgi-bin/carddisp.pl?gene=HERC5
OXA1L	OXA1L Mitochondrial Inner Membrane Protein	Protein Coding	40	GC14P022766	2.14699	https://www.genecards.org/cgi-bin/carddisp.pl?gene=OXA1L
TIMM44	Translocase Of Inner Mitochondrial Membrane 44	Protein Coding	39	GC19M007926	2.14699	https://www.genecards.org/cgi-bin/carddisp.pl?gene=TIMM44
CERS6	Ceramide Synthase 6	Protein Coding	38	GC02P168455	2.14699	https://www.genecards.org/cgi-bin/carddisp.pl?gene=CERS6
ZC3HAV1	Zinc Finger CCCH-Type Containing, Antiviral 1	Protein Coding	38	GC07M139044	2.14699	https://www.genecards.org/cgi-bin/carddisp.pl?gene=ZC3HAV1
HIRIP3	HIRA Interacting Protein 3	Protein Coding	37	GC16M029992	2.14699	https://www.genecards.org/cgi-bin/carddisp.pl?gene=HIRIP3
ESYT2	Extended Synaptotagmin 2	Protein Coding	36	GC07M158730	2.14699	https://www.genecards.org/cgi-bin/carddisp.pl?gene=ESYT2
MIRLET7B	MicroRNA Let-7b	RNA Gene	20	GC22P046119	2.14699	https://www.genecards.org/cgi-bin/carddisp.pl?gene=MIRLET7B
MIR320A	MicroRNA 320a	RNA Gene	19	GC08M022249	2.14699	https://www.genecards.org/cgi-bin/carddisp.pl?gene=MIR320A
MIR488	MicroRNA 488	RNA Gene	16	GC01M177029	2.14699	https://www.genecards.org/cgi-bin/carddisp.pl?gene=MIR488
SNHG9	Small Nucleolar RNA Host Gene 9	RNA Gene	15	GC16P002501	2.14699	https://www.genecards.org/cgi-bin/carddisp.pl?gene=SNHG9
LINC01123	Long Intergenic Non-Protein Coding RNA 1123	RNA Gene	13	GC02P109986	2.14699	https://www.genecards.org/cgi-bin/carddisp.pl?gene=LINC01123
MIR4458	MicroRNA 4458	RNA Gene	10	GC05P008460	2.14699	https://www.genecards.org/cgi-bin/carddisp.pl?gene=MIR4458
LNCARSR	LncRNA Regulator Of Akt Signaling Associated With HCC And RCC	RNA Gene	10	GC09M079507	2.14699	https://www.genecards.org/cgi-bin/carddisp.pl?gene=LNCARSR
COX5A	Cytochrome C Oxidase Subunit 5A	Protein Coding	45	GC15M074919	2.13555	https://www.genecards.org/cgi-bin/carddisp.pl?gene=COX5A
MT-TL1	Mitochondrially Encoded TRNA-Leu (UUA/G) 1	RNA Gene	15	GCMTP003232	2.12759	https://www.genecards.org/cgi-bin/carddisp.pl?gene=MT-TL1
NOTCH1	Notch Receptor 1	Protein Coding	52	GC09M136623	2.1206	https://www.genecards.org/cgi-bin/carddisp.pl?gene=NOTCH1
CSNK2A1	Casein Kinase 2 Alpha 1	Protein Coding	53	GC20M000472	2.11299	https://www.genecards.org/cgi-bin/carddisp.pl?gene=CSNK2A1
SLC9A1	Solute Carrier Family 9 Member A1	Protein Coding	52	GC01M027109	2.11299	https://www.genecards.org/cgi-bin/carddisp.pl?gene=SLC9A1
SUMO1	Small Ubiquitin Like Modifier 1	Protein Coding	47	GC02M202206	2.10557	https://www.genecards.org/cgi-bin/carddisp.pl?gene=SUMO1
P2RY2	Purinergic Receptor P2Y2	Protein Coding	47	GC11P073202	2.10557	https://www.genecards.org/cgi-bin/carddisp.pl?gene=P2RY2
CBX5	Chromobox 5	Protein Coding	45	GC12M054230	2.10557	https://www.genecards.org/cgi-bin/carddisp.pl?gene=CBX5
SALL4	Spalt Like Transcription Factor 4	Protein Coding	45	GC20M051784	2.10557	https://www.genecards.org/cgi-bin/carddisp.pl?gene=SALL4
PLCE1	Phospholipase C Epsilon 1	Protein Coding	44	GC10P093993	2.10557	https://www.genecards.org/cgi-bin/carddisp.pl?gene=PLCE1
SENP1	SUMO Specific Peptidase 1	Protein Coding	43	GC12M048042	2.10557	https://www.genecards.org/cgi-bin/carddisp.pl?gene=SENP1
SLC7A8	Solute Carrier Family 7 Member 8	Protein Coding	43	GC14M023125	2.10557	https://www.genecards.org/cgi-bin/carddisp.pl?gene=SLC7A8
ATP6V0C	ATPase H+ Transporting V0 Subunit C	Protein Coding	42	GC16P002513	2.10557	https://www.genecards.org/cgi-bin/carddisp.pl?gene=ATP6V0C
KLF8	Kruppel Like Factor 8	Protein Coding	39	GC0XP055909	2.10557	https://www.genecards.org/cgi-bin/carddisp.pl?gene=KLF8
UXT	Ubiquitously Expressed Prefoldin Like Chaperone	Protein Coding	38	GC0XM047651	2.10557	https://www.genecards.org/cgi-bin/carddisp.pl?gene=UXT
BARX2	BARX Homeobox 2	Protein Coding	35	GC11P129375	2.10557	https://www.genecards.org/cgi-bin/carddisp.pl?gene=BARX2
ANP32E	Acidic Nuclear Phosphoprotein 32 Family Member E	Protein Coding	35	GC01M150190	2.10557	https://www.genecards.org/cgi-bin/carddisp.pl?gene=ANP32E
DENND4C	DENN Domain Containing 4C	Protein Coding	33	GC09P019230	2.10557	https://www.genecards.org/cgi-bin/carddisp.pl?gene=DENND4C
MIR152	MicroRNA 152	RNA Gene	20	GC17M048037	2.10557	https://www.genecards.org/cgi-bin/carddisp.pl?gene=MIR152
MIR33B	MicroRNA 33b	RNA Gene	19	GC17M017813	2.10557	https://www.genecards.org/cgi-bin/carddisp.pl?gene=MIR33B
FTX	FTX Transcript, XIST Regulator	RNA Gene	19	GC0XM073946	2.10557	https://www.genecards.org/cgi-bin/carddisp.pl?gene=FTX
LINC00174	Long Intergenic Non-Protein Coding RNA 174	RNA Gene	19	GC07M066376	2.10557	https://www.genecards.org/cgi-bin/carddisp.pl?gene=LINC00174
MIR409	MicroRNA 409	RNA Gene	18	GC14P105304	2.10557	https://www.genecards.org/cgi-bin/carddisp.pl?gene=MIR409
MIR497	MicroRNA 497	RNA Gene	17	GC17M007022	2.10557	https://www.genecards.org/cgi-bin/carddisp.pl?gene=MIR497
LINC00243	Long Intergenic Non-Protein Coding RNA 243	RNA Gene	16	GC06M031118	2.10557	https://www.genecards.org/cgi-bin/carddisp.pl?gene=LINC00243
MIR1180	MicroRNA 1180	RNA Gene	16	GC17M019344	2.10557	https://www.genecards.org/cgi-bin/carddisp.pl?gene=MIR1180
MIR18B	MicroRNA 18b	RNA Gene	15	GC0XM134218	2.10557	https://www.genecards.org/cgi-bin/carddisp.pl?gene=MIR18B
MIR625	MicroRNA 625	RNA Gene	15	GC14P065471	2.10557	https://www.genecards.org/cgi-bin/carddisp.pl?gene=MIR625
MIR507	MicroRNA 507	RNA Gene	13	GC0XM147246	2.10557	https://www.genecards.org/cgi-bin/carddisp.pl?gene=MIR507
GSR	Glutathione-Disulfide Reductase	Protein Coding	50	GC08M030678	2.10046	https://www.genecards.org/cgi-bin/carddisp.pl?gene=GSR
MRPL28	Mitochondrial Ribosomal Protein L28	Protein Coding	39	GC16M000357	2.10046	https://www.genecards.org/cgi-bin/carddisp.pl?gene=MRPL28
PPP2CA	Protein Phosphatase 2 Catalytic Subunit Alpha	Protein Coding	50	GC05M134194	2.08614	https://www.genecards.org/cgi-bin/carddisp.pl?gene=PPP2CA
TXN	Thioredoxin	Protein Coding	46	GC09M110243	2.07711	https://www.genecards.org/cgi-bin/carddisp.pl?gene=TXN
ATF4	Activating Transcription Factor 4	Protein Coding	47	GC22P039530	2.07572	https://www.genecards.org/cgi-bin/carddisp.pl?gene=ATF4
UCP3	Uncoupling Protein 3	Protein Coding	44	GC11M074000	2.07572	https://www.genecards.org/cgi-bin/carddisp.pl?gene=UCP3
BCR	BCR Activator Of RhoGEF And GTPase	Protein Coding	53	GC22P023179	2.05321	https://www.genecards.org/cgi-bin/carddisp.pl?gene=BCR
CTBP1	C-Terminal Binding Protein 1	Protein Coding	49	GC04M001211	2.05321	https://www.genecards.org/cgi-bin/carddisp.pl?gene=CTBP1
FLT1	Fms Related Receptor Tyrosine Kinase 1	Protein Coding	52	GC13M028300	2.05202	https://www.genecards.org/cgi-bin/carddisp.pl?gene=FLT1
CD36	CD36 Molecule	Protein Coding	49	GC07P080369	2.05202	https://www.genecards.org/cgi-bin/carddisp.pl?gene=CD36
LRP6	LDL Receptor Related Protein 6	Protein Coding	49	GC12M014416	2.05202	https://www.genecards.org/cgi-bin/carddisp.pl?gene=LRP6
FKBP5	FKBP Prolyl Isomerase 5	Protein Coding	47	GC06M043469	2.05202	https://www.genecards.org/cgi-bin/carddisp.pl?gene=FKBP5
HSD11B2	Hydroxysteroid 11-Beta Dehydrogenase 2	Protein Coding	47	GC16P067433	2.05202	https://www.genecards.org/cgi-bin/carddisp.pl?gene=HSD11B2
ACTN4	Actinin Alpha 4	Protein Coding	47	GC19P038647	2.05202	https://www.genecards.org/cgi-bin/carddisp.pl?gene=ACTN4
GPC4	Glypican 4	Protein Coding	46	GC0XM133300	2.05202	https://www.genecards.org/cgi-bin/carddisp.pl?gene=GPC4
PRKD3	Protein Kinase D3	Protein Coding	46	GC02M037251	2.05202	https://www.genecards.org/cgi-bin/carddisp.pl?gene=PRKD3
FOXC2	Forkhead Box C2	Protein Coding	45	GC16P086567	2.05202	https://www.genecards.org/cgi-bin/carddisp.pl?gene=FOXC2
GRPR	Gastrin Releasing Peptide Receptor	Protein Coding	43	GC0XP016141	2.05202	https://www.genecards.org/cgi-bin/carddisp.pl?gene=GRPR
PSME3	Proteasome Activator Subunit 3	Protein Coding	43	GC17P042824	2.05202	https://www.genecards.org/cgi-bin/carddisp.pl?gene=PSME3
IL22	Interleukin 22	Protein Coding	42	GC12M068248	2.05202	https://www.genecards.org/cgi-bin/carddisp.pl?gene=IL22
MICU1	Mitochondrial Calcium Uptake 1	Protein Coding	41	GC10M072367	2.05202	https://www.genecards.org/cgi-bin/carddisp.pl?gene=MICU1
USP53	Ubiquitin Specific Peptidase 53	Protein Coding	41	GC04P119212	2.05202	https://www.genecards.org/cgi-bin/carddisp.pl?gene=USP53
USP6NL	USP6 N-Terminal Like	Protein Coding	41	GC10M011453	2.05202	https://www.genecards.org/cgi-bin/carddisp.pl?gene=USP6NL
EML4	EMAP Like 4	Protein Coding	39	GC02P042169	2.05202	https://www.genecards.org/cgi-bin/carddisp.pl?gene=EML4
KMT5A	Lysine Methyltransferase 5A	Protein Coding	39	GC12P123385	2.05202	https://www.genecards.org/cgi-bin/carddisp.pl?gene=KMT5A
CRIP2	Cysteine Rich Protein 2	Protein Coding	37	GC14P105472	2.05202	https://www.genecards.org/cgi-bin/carddisp.pl?gene=CRIP2
FBXO31	F-Box Protein 31	Protein Coding	36	GC16M087326	2.05202	https://www.genecards.org/cgi-bin/carddisp.pl?gene=FBXO31
ATOH8	Atonal BHLH Transcription Factor 8	Protein Coding	34	GC02P085751	2.05202	https://www.genecards.org/cgi-bin/carddisp.pl?gene=ATOH8
FOXO6	Forkhead Box O6	Protein Coding	33	GC01P041361	2.05202	https://www.genecards.org/cgi-bin/carddisp.pl?gene=FOXO6
PRMT9	Protein Arginine Methyltransferase 9	Protein Coding	32	GC04M147637	2.05202	https://www.genecards.org/cgi-bin/carddisp.pl?gene=PRMT9
H1-3	H1.3 Linker Histone, Cluster Member	Protein Coding	31	GC06M027803	2.05202	https://www.genecards.org/cgi-bin/carddisp.pl?gene=H1-3
VWA8	Von Willebrand Factor A Domain Containing 8	Protein Coding	31	GC13M041569	2.05202	https://www.genecards.org/cgi-bin/carddisp.pl?gene=VWA8
H2BC1	H2B Clustered Histone 1	Protein Coding	27	GC06P025865	2.05202	https://www.genecards.org/cgi-bin/carddisp.pl?gene=H2BC1
MIR30C1	MicroRNA 30c-1	RNA Gene	21	GC01P040757	2.05202	https://www.genecards.org/cgi-bin/carddisp.pl?gene=MIR30C1
MIR93	MicroRNA 93	RNA Gene	20	GC07M100340	2.05202	https://www.genecards.org/cgi-bin/carddisp.pl?gene=MIR93
HOTAIRM1	HOXA Transcript Antisense RNA, Myeloid-Specific 1	RNA Gene	19	GC07P027095	2.05202	https://www.genecards.org/cgi-bin/carddisp.pl?gene=HOTAIRM1
MIR375	MicroRNA 375	RNA Gene	19	GC02M219001	2.05202	https://www.genecards.org/cgi-bin/carddisp.pl?gene=MIR375
HOXB-AS3	HOXB Cluster Antisense RNA 3	RNA Gene	18	GC17P048549	2.05202	https://www.genecards.org/cgi-bin/carddisp.pl?gene=HOXB-AS3
MIR323A	MicroRNA 323a	RNA Gene	16	GC14P105282	2.05202	https://www.genecards.org/cgi-bin/carddisp.pl?gene=MIR323A
MIR383	MicroRNA 383	RNA Gene	15	GC08M014853	2.05202	https://www.genecards.org/cgi-bin/carddisp.pl?gene=MIR383
MIR543	MicroRNA 543	RNA Gene	15	GC14P105005	2.05202	https://www.genecards.org/cgi-bin/carddisp.pl?gene=MIR543
NORAD	Non-Coding RNA Activated By DNA Damage	RNA Gene	14	GC20M036058	2.05202	https://www.genecards.org/cgi-bin/carddisp.pl?gene=NORAD
FGF13-AS1	FGF13 Antisense RNA 1	RNA Gene	13	GC0XP138711	2.05202	https://www.genecards.org/cgi-bin/carddisp.pl?gene=FGF13-AS1
LINC00662	Long Intergenic Non-Protein Coding RNA 662	RNA Gene	13	GC19M027663	2.05202	https://www.genecards.org/cgi-bin/carddisp.pl?gene=LINC00662
WFDC21P	WAP Four-Disulfide Core Domain 21, Pseudogene	Pseudogene	12	GC17M060085	2.05202	https://www.genecards.org/cgi-bin/carddisp.pl?gene=WFDC21P
MAPK8	Mitogen-Activated Protein Kinase 8	Protein Coding	51	GC10P048306	2.04869	https://www.genecards.org/cgi-bin/carddisp.pl?gene=MAPK8
HADHA	Hydroxyacyl-CoA Dehydrogenase Trifunctional Multienzyme Complex Subunit Alpha	Protein Coding	47	GC02M026190	2.04869	https://www.genecards.org/cgi-bin/carddisp.pl?gene=HADHA
GCKR	Glucokinase Regulator	Protein Coding	42	GC02P027496	2.04869	https://www.genecards.org/cgi-bin/carddisp.pl?gene=GCKR
IFNG	Interferon Gamma	Protein Coding	49	GC12M068154	2.03798	https://www.genecards.org/cgi-bin/carddisp.pl?gene=IFNG
HBG2	Hemoglobin Subunit Gamma 2	Protein Coding	43	GC11M005384	2.02016	https://www.genecards.org/cgi-bin/carddisp.pl?gene=HBG2
DNM1L	Dynamin 1 Like	Protein Coding	48	GC12P032679	2.01146	https://www.genecards.org/cgi-bin/carddisp.pl?gene=DNM1L
HADHB	Hydroxyacyl-CoA Dehydrogenase Trifunctional Multienzyme Complex Subunit Beta	Protein Coding	48	GC02P026243	2.01146	https://www.genecards.org/cgi-bin/carddisp.pl?gene=HADHB
GLS2	Glutaminase 2	Protein Coding	42	GC12M056470	2.01146	https://www.genecards.org/cgi-bin/carddisp.pl?gene=GLS2
SHC1	SHC Adaptor Protein 1	Protein Coding	46	GC01M154962	2.01038	https://www.genecards.org/cgi-bin/carddisp.pl?gene=SHC1
WWOX	WW Domain Containing Oxidoreductase	Protein Coding	48	GC16P078099	1.9992	https://www.genecards.org/cgi-bin/carddisp.pl?gene=WWOX
TALDO1	Transaldolase 1	Protein Coding	47	GC11P000749	1.99404	https://www.genecards.org/cgi-bin/carddisp.pl?gene=TALDO1
NCOA3	Nuclear Receptor Coactivator 3	Protein Coding	47	GC20P047501	1.97677	https://www.genecards.org/cgi-bin/carddisp.pl?gene=NCOA3
JAK1	Janus Kinase 1	Protein Coding	54	GC01M064833	1.97215	https://www.genecards.org/cgi-bin/carddisp.pl?gene=JAK1
HGF	Hepatocyte Growth Factor	Protein Coding	53	GC07M081699	1.97215	https://www.genecards.org/cgi-bin/carddisp.pl?gene=HGF
NFKB2	Nuclear Factor Kappa B Subunit 2	Protein Coding	53	GC10P102394	1.97215	https://www.genecards.org/cgi-bin/carddisp.pl?gene=NFKB2
PRKCG	Protein Kinase C Gamma	Protein Coding	53	GC19P053879	1.97215	https://www.genecards.org/cgi-bin/carddisp.pl?gene=PRKCG
PRKCA	Protein Kinase C Alpha	Protein Coding	52	GC17P066302	1.97215	https://www.genecards.org/cgi-bin/carddisp.pl?gene=PRKCA
CCND2	Cyclin D2	Protein Coding	50	GC12P008914	1.97215	https://www.genecards.org/cgi-bin/carddisp.pl?gene=CCND2
HSD11B1	Hydroxysteroid 11-Beta Dehydrogenase 1	Protein Coding	50	GC01P209686	1.97215	https://www.genecards.org/cgi-bin/carddisp.pl?gene=HSD11B1
SHH	Sonic Hedgehog Signaling Molecule	Protein Coding	50	GC07M155799	1.97215	https://www.genecards.org/cgi-bin/carddisp.pl?gene=SHH
GNAI2	G Protein Subunit Alpha I2	Protein Coding	49	GC03P050226	1.97215	https://www.genecards.org/cgi-bin/carddisp.pl?gene=GNAI2
GPHN	Gephyrin	Protein Coding	49	GC14P066507	1.97215	https://www.genecards.org/cgi-bin/carddisp.pl?gene=GPHN
HMOX2	Heme Oxygenase 2	Protein Coding	49	GC16P004474	1.97215	https://www.genecards.org/cgi-bin/carddisp.pl?gene=HMOX2
QDPR	Quinoid Dihydropteridine Reductase	Protein Coding	49	GC04M017460	1.97215	https://www.genecards.org/cgi-bin/carddisp.pl?gene=QDPR
PLD1	Phospholipase D1	Protein Coding	49	GC03M171600	1.97215	https://www.genecards.org/cgi-bin/carddisp.pl?gene=PLD1
STXBP1	Syntaxin Binding Protein 1	Protein Coding	49	GC09P127582	1.97215	https://www.genecards.org/cgi-bin/carddisp.pl?gene=STXBP1
KAT2A	Lysine Acetyltransferase 2A	Protein Coding	48	GC17M042113	1.97215	https://www.genecards.org/cgi-bin/carddisp.pl?gene=KAT2A
ROCK2	Rho Associated Coiled-Coil Containing Protein Kinase 2	Protein Coding	48	GC02M011203	1.97215	https://www.genecards.org/cgi-bin/carddisp.pl?gene=ROCK2
STX1A	Syntaxin 1A	Protein Coding	48	GC07M073700	1.97215	https://www.genecards.org/cgi-bin/carddisp.pl?gene=STX1A
BIN1	Bridging Integrator 1	Protein Coding	47	GC02M127048	1.97215	https://www.genecards.org/cgi-bin/carddisp.pl?gene=BIN1
CAMK4	Calcium/Calmodulin Dependent Protein Kinase IV	Protein Coding	47	GC05P111223	1.97215	https://www.genecards.org/cgi-bin/carddisp.pl?gene=CAMK4
CBR1	Carbonyl Reductase 1	Protein Coding	47	GC21P036069	1.97215	https://www.genecards.org/cgi-bin/carddisp.pl?gene=CBR1
ABCC3	ATP Binding Cassette Subfamily C Member 3	Protein Coding	47	GC17P050634	1.97215	https://www.genecards.org/cgi-bin/carddisp.pl?gene=ABCC3
LIG1	DNA Ligase 1	Protein Coding	47	GC19M048115	1.97215	https://www.genecards.org/cgi-bin/carddisp.pl?gene=LIG1
GABRA1	Gamma-Aminobutyric Acid Type A Receptor Subunit Alpha1	Protein Coding	47	GC05P161847	1.97215	https://www.genecards.org/cgi-bin/carddisp.pl?gene=GABRA1
L1CAM	L1 Cell Adhesion Molecule	Protein Coding	47	GC0XM153864	1.97215	https://www.genecards.org/cgi-bin/carddisp.pl?gene=L1CAM
P4HA2	Prolyl 4-Hydroxylase Subunit Alpha 2	Protein Coding	47	GC05M132191	1.97215	https://www.genecards.org/cgi-bin/carddisp.pl?gene=P4HA2
BTRC	Beta-Transducin Repeat Containing E3 Ubiquitin Protein Ligase	Protein Coding	47	GC10P101354	1.97215	https://www.genecards.org/cgi-bin/carddisp.pl?gene=BTRC
EPB41	Erythrocyte Membrane Protein Band 4.1	Protein Coding	46	GC01P028887	1.97215	https://www.genecards.org/cgi-bin/carddisp.pl?gene=EPB41
CRYM	Crystallin Mu	Protein Coding	46	GC16M021238	1.97215	https://www.genecards.org/cgi-bin/carddisp.pl?gene=CRYM
GMNN	Geminin DNA Replication Inhibitor	Protein Coding	46	GC06P024779	1.97215	https://www.genecards.org/cgi-bin/carddisp.pl?gene=GMNN
HLA-C	Major Histocompatibility Complex, Class I, C	Protein Coding	46	GC06M032967	1.97215	https://www.genecards.org/cgi-bin/carddisp.pl?gene=HLA-C
LAMB3	Laminin Subunit Beta 3	Protein Coding	46	GC01M209614	1.97215	https://www.genecards.org/cgi-bin/carddisp.pl?gene=LAMB3
MBP	Myelin Basic Protein	Protein Coding	46	GC18M076978	1.97215	https://www.genecards.org/cgi-bin/carddisp.pl?gene=MBP
ATP2B1	ATPase Plasma Membrane Ca2+ Transporting 1	Protein Coding	46	GC12M089588	1.97215	https://www.genecards.org/cgi-bin/carddisp.pl?gene=ATP2B1
RELB	RELB Proto-Oncogene, NF-KB Subunit	Protein Coding	46	GC19P045002	1.97215	https://www.genecards.org/cgi-bin/carddisp.pl?gene=RELB
PYCR2	Pyrroline-5-Carboxylate Reductase 2	Protein Coding	46	GC01M225919	1.97215	https://www.genecards.org/cgi-bin/carddisp.pl?gene=PYCR2
PSMB10	Proteasome 20S Subunit Beta 10	Protein Coding	46	GC16M067937	1.97215	https://www.genecards.org/cgi-bin/carddisp.pl?gene=PSMB10
RAD21	RAD21 Cohesin Complex Component	Protein Coding	46	GC08M116846	1.97215	https://www.genecards.org/cgi-bin/carddisp.pl?gene=RAD21
MOG	Myelin Oligodendrocyte Glycoprotein	Protein Coding	46	GC06P049293	1.97215	https://www.genecards.org/cgi-bin/carddisp.pl?gene=MOG
BRD4	Bromodomain Containing 4	Protein Coding	46	GC19M015236	1.97215	https://www.genecards.org/cgi-bin/carddisp.pl?gene=BRD4
SLC8A1	Solute Carrier Family 8 Member A1	Protein Coding	46	GC02M040078	1.97215	https://www.genecards.org/cgi-bin/carddisp.pl?gene=SLC8A1
WASF1	WASP Family Member 1	Protein Coding	46	GC06M110099	1.97215	https://www.genecards.org/cgi-bin/carddisp.pl?gene=WASF1
BCAR1	BCAR1 Scaffold Protein, Cas Family Member	Protein Coding	45	GC16M075228	1.97215	https://www.genecards.org/cgi-bin/carddisp.pl?gene=BCAR1
DNAJB1	DnaJ Heat Shock Protein Family (Hsp40) Member B1	Protein Coding	45	GC19M014514	1.97215	https://www.genecards.org/cgi-bin/carddisp.pl?gene=DNAJB1
CUL4B	Cullin 4B	Protein Coding	45	GC0XM120524	1.97215	https://www.genecards.org/cgi-bin/carddisp.pl?gene=CUL4B
DAXX	Death Domain Associated Protein	Protein Coding	45	GC06M033318	1.97215	https://www.genecards.org/cgi-bin/carddisp.pl?gene=DAXX
HSPA1A	Heat Shock Protein Family A (Hsp70) Member 1A	Protein Coding	45	GC06P049370	1.97215	https://www.genecards.org/cgi-bin/carddisp.pl?gene=HSPA1A
MSTN	Myostatin	Protein Coding	45	GC02M190055	1.97215	https://www.genecards.org/cgi-bin/carddisp.pl?gene=MSTN
NCOR2	Nuclear Receptor Corepressor 2	Protein Coding	45	GC12M124324	1.97215	https://www.genecards.org/cgi-bin/carddisp.pl?gene=NCOR2
TAPBP	TAP Binding Protein	Protein Coding	45	GC06M033299	1.97215	https://www.genecards.org/cgi-bin/carddisp.pl?gene=TAPBP
DSG1	Desmoglein 1	Protein Coding	45	GC18P031318	1.97215	https://www.genecards.org/cgi-bin/carddisp.pl?gene=DSG1
VAMP2	Vesicle Associated Membrane Protein 2	Protein Coding	45	GC17M008952	1.97215	https://www.genecards.org/cgi-bin/carddisp.pl?gene=VAMP2
XRCC1	X-Ray Repair Cross Complementing 1	Protein Coding	45	GC19M043543	1.97215	https://www.genecards.org/cgi-bin/carddisp.pl?gene=XRCC1
SEC23A	SEC23 Homolog A, COPII Coat Complex Component	Protein Coding	45	GC14M039031	1.97215	https://www.genecards.org/cgi-bin/carddisp.pl?gene=SEC23A
EPB41L1	Erythrocyte Membrane Protein Band 4.1 Like 1	Protein Coding	44	GC20P036064	1.97215	https://www.genecards.org/cgi-bin/carddisp.pl?gene=EPB41L1
CARD14	Caspase Recruitment Domain Family Member 14	Protein Coding	44	GC17P080170	1.97215	https://www.genecards.org/cgi-bin/carddisp.pl?gene=CARD14
ARHGEF7	Rho Guanine Nucleotide Exchange Factor 7	Protein Coding	44	GC13P111114	1.97215	https://www.genecards.org/cgi-bin/carddisp.pl?gene=ARHGEF7
DKK2	Dickkopf WNT Signaling Pathway Inhibitor 2	Protein Coding	44	GC04M106921	1.97215	https://www.genecards.org/cgi-bin/carddisp.pl?gene=DKK2
NUP98	Nucleoporin 98 And 96 Precursor	Protein Coding	44	GC11M003671	1.97215	https://www.genecards.org/cgi-bin/carddisp.pl?gene=NUP98
GDA	Guanine Deaminase	Protein Coding	44	GC09P072114	1.97215	https://www.genecards.org/cgi-bin/carddisp.pl?gene=GDA
SEC63	SEC63 Homolog, Protein Translocation Regulator	Protein Coding	44	GC06M107867	1.97215	https://www.genecards.org/cgi-bin/carddisp.pl?gene=SEC63
SEC23B	SEC23 Homolog B, COPII Coat Complex Component	Protein Coding	44	GC20P018507	1.97215	https://www.genecards.org/cgi-bin/carddisp.pl?gene=SEC23B
ASPH	Aspartate Beta-Hydroxylase	Protein Coding	43	GC08M061500	1.97215	https://www.genecards.org/cgi-bin/carddisp.pl?gene=ASPH
DIAPH3	Diaphanous Related Formin 3	Protein Coding	43	GC13M059665	1.97215	https://www.genecards.org/cgi-bin/carddisp.pl?gene=DIAPH3
ABI1	Abl Interactor 1	Protein Coding	43	GC10M026746	1.97215	https://www.genecards.org/cgi-bin/carddisp.pl?gene=ABI1
KIF2A	Kinesin Family Member 2A	Protein Coding	43	GC05P062306	1.97215	https://www.genecards.org/cgi-bin/carddisp.pl?gene=KIF2A
RECQL4	RecQ Like Helicase 4	Protein Coding	43	GC08M144512	1.97215	https://www.genecards.org/cgi-bin/carddisp.pl?gene=RECQL4
USP11	Ubiquitin Specific Peptidase 11	Protein Coding	43	GC0XP047232	1.97215	https://www.genecards.org/cgi-bin/carddisp.pl?gene=USP11
ANK2	Ankyrin 2	Protein Coding	42	GC04P112706	1.97215	https://www.genecards.org/cgi-bin/carddisp.pl?gene=ANK2
LGALS3BP	Galectin 3 Binding Protein	Protein Coding	42	GC17M078971	1.97215	https://www.genecards.org/cgi-bin/carddisp.pl?gene=LGALS3BP
SDCBP	Syndecan Binding Protein	Protein Coding	42	GC08P058539	1.97215	https://www.genecards.org/cgi-bin/carddisp.pl?gene=SDCBP
RNF8	Ring Finger Protein 8	Protein Coding	42	GC06P049532	1.97215	https://www.genecards.org/cgi-bin/carddisp.pl?gene=RNF8
PXDN	Peroxidasin	Protein Coding	42	GC02M001635	1.97215	https://www.genecards.org/cgi-bin/carddisp.pl?gene=PXDN
TFCP2	Transcription Factor CP2	Protein Coding	42	GC12M051093	1.97215	https://www.genecards.org/cgi-bin/carddisp.pl?gene=TFCP2
SYN3	Synapsin III	Protein Coding	42	GC22M032512	1.97215	https://www.genecards.org/cgi-bin/carddisp.pl?gene=SYN3
PCMT1	Protein-L-Isoaspartate (D-Aspartate) O-Methyltransferase	Protein Coding	42	GC06P149749	1.97215	https://www.genecards.org/cgi-bin/carddisp.pl?gene=PCMT1
KANK1	KN Motif And Ankyrin Repeat Domains 1	Protein Coding	42	GC09P000474	1.97215	https://www.genecards.org/cgi-bin/carddisp.pl?gene=KANK1
VPS33A	VPS33A Core Subunit Of CORVET And HOPS Complexes	Protein Coding	42	GC12M122229	1.97215	https://www.genecards.org/cgi-bin/carddisp.pl?gene=VPS33A
CAP1	Cyclase Associated Actin Cytoskeleton Regulatory Protein 1	Protein Coding	41	GC01P040041	1.97215	https://www.genecards.org/cgi-bin/carddisp.pl?gene=CAP1
DHX16	DEAH-Box Helicase 16	Protein Coding	41	GC06M030653	1.97215	https://www.genecards.org/cgi-bin/carddisp.pl?gene=DHX16
INF2	Inverted Formin 2	Protein Coding	41	GC14P105051	1.97215	https://www.genecards.org/cgi-bin/carddisp.pl?gene=INF2
IVNS1ABP	Influenza Virus NS1A Binding Protein	Protein Coding	41	GC01M185297	1.97215	https://www.genecards.org/cgi-bin/carddisp.pl?gene=IVNS1ABP
MAP1A	Microtubule Associated Protein 1A	Protein Coding	41	GC15P043516	1.97215	https://www.genecards.org/cgi-bin/carddisp.pl?gene=MAP1A
ME3	Malic Enzyme 3	Protein Coding	41	GC11M086441	1.97215	https://www.genecards.org/cgi-bin/carddisp.pl?gene=ME3
CDC5L	Cell Division Cycle 5 Like	Protein Coding	41	GC06P044387	1.97215	https://www.genecards.org/cgi-bin/carddisp.pl?gene=CDC5L
OAS3	2'-5'-Oligoadenylate Synthetase 3	Protein Coding	41	GC12P112938	1.97215	https://www.genecards.org/cgi-bin/carddisp.pl?gene=OAS3
OASL	2'-5'-Oligoadenylate Synthetase Like	Protein Coding	41	GC12M121319	1.97215	https://www.genecards.org/cgi-bin/carddisp.pl?gene=OASL
PPFIBP1	PPFIA Binding Protein 1	Protein Coding	41	GC12P027523	1.97215	https://www.genecards.org/cgi-bin/carddisp.pl?gene=PPFIBP1
RIOK1	RIO Kinase 1	Protein Coding	41	GC06P007389	1.97215	https://www.genecards.org/cgi-bin/carddisp.pl?gene=RIOK1
PITPNA	Phosphatidylinositol Transfer Protein Alpha	Protein Coding	41	GC17M001525	1.97215	https://www.genecards.org/cgi-bin/carddisp.pl?gene=PITPNA
OXR1	Oxidation Resistance 1	Protein Coding	41	GC08P106271	1.97215	https://www.genecards.org/cgi-bin/carddisp.pl?gene=OXR1
SSRP1	Structure Specific Recognition Protein 1	Protein Coding	41	GC11M063687	1.97215	https://www.genecards.org/cgi-bin/carddisp.pl?gene=SSRP1
DHRS2	Dehydrogenase/Reductase 2	Protein Coding	40	GC14P025577	1.97215	https://www.genecards.org/cgi-bin/carddisp.pl?gene=DHRS2
DDX50	DExD-Box Helicase 50	Protein Coding	40	GC10P068901	1.97215	https://www.genecards.org/cgi-bin/carddisp.pl?gene=DDX50
IFIT1	Interferon Induced Protein With Tetratricopeptide Repeats 1	Protein Coding	40	GC10P089396	1.97215	https://www.genecards.org/cgi-bin/carddisp.pl?gene=IFIT1
IFIT2	Interferon Induced Protein With Tetratricopeptide Repeats 2	Protein Coding	40	GC10P089284	1.97215	https://www.genecards.org/cgi-bin/carddisp.pl?gene=IFIT2
PELP1	Proline, Glutamate And Leucine Rich Protein 1	Protein Coding	40	GC17M004669	1.97215	https://www.genecards.org/cgi-bin/carddisp.pl?gene=PELP1
RIN1	Ras And Rab Interactor 1	Protein Coding	40	GC11M066335	1.97215	https://www.genecards.org/cgi-bin/carddisp.pl?gene=RIN1
TOR1AIP1	Torsin 1A Interacting Protein 1	Protein Coding	40	GC01P179882	1.97215	https://www.genecards.org/cgi-bin/carddisp.pl?gene=TOR1AIP1
YBX3	Y-Box Binding Protein 3	Protein Coding	40	GC12M014394	1.97215	https://www.genecards.org/cgi-bin/carddisp.pl?gene=YBX3
SPAG1	Sperm Associated Antigen 1	Protein Coding	40	GC08P100157	1.97215	https://www.genecards.org/cgi-bin/carddisp.pl?gene=SPAG1
CSDE1	Cold Shock Domain Containing E1	Protein Coding	39	GC01M114716	1.97215	https://www.genecards.org/cgi-bin/carddisp.pl?gene=CSDE1
DCTN4	Dynactin Subunit 4	Protein Coding	39	GC05M150708	1.97215	https://www.genecards.org/cgi-bin/carddisp.pl?gene=DCTN4
CXCL14	C-X-C Motif Chemokine Ligand 14	Protein Coding	39	GC05M135617	1.97215	https://www.genecards.org/cgi-bin/carddisp.pl?gene=CXCL14
DSC1	Desmocollin 1	Protein Coding	39	GC18M031129	1.97215	https://www.genecards.org/cgi-bin/carddisp.pl?gene=DSC1
DDX24	DEAD-Box Helicase 24	Protein Coding	39	GC14M094048	1.97215	https://www.genecards.org/cgi-bin/carddisp.pl?gene=DDX24
FHL5	Four And A Half LIM Domains 5	Protein Coding	39	GC06P096562	1.97215	https://www.genecards.org/cgi-bin/carddisp.pl?gene=FHL5
IFIT3	Interferon Induced Protein With Tetratricopeptide Repeats 3	Protein Coding	39	GC10P089327	1.97215	https://www.genecards.org/cgi-bin/carddisp.pl?gene=IFIT3
PPP4R1	Protein Phosphatase 4 Regulatory Subunit 1	Protein Coding	39	GC18M009546	1.97215	https://www.genecards.org/cgi-bin/carddisp.pl?gene=PPP4R1
PES1	Pescadillo Ribosomal Biogenesis Factor 1	Protein Coding	39	GC22M030576	1.97215	https://www.genecards.org/cgi-bin/carddisp.pl?gene=PES1
NAPG	NSF Attachment Protein Gamma	Protein Coding	39	GC18P010516	1.97215	https://www.genecards.org/cgi-bin/carddisp.pl?gene=NAPG
RBSN	Rabenosyn, RAB Effector	Protein Coding	39	GC03M015070	1.97215	https://www.genecards.org/cgi-bin/carddisp.pl?gene=RBSN
PIP	Prolactin Induced Protein	Protein Coding	39	GC07P143132	1.97215	https://www.genecards.org/cgi-bin/carddisp.pl?gene=PIP
SYT5	Synaptotagmin 5	Protein Coding	39	GC19M055172	1.97215	https://www.genecards.org/cgi-bin/carddisp.pl?gene=SYT5
TXNDC5	Thioredoxin Domain Containing 5	Protein Coding	39	GC06M007893	1.97215	https://www.genecards.org/cgi-bin/carddisp.pl?gene=TXNDC5
RAP2B	RAP2B, Member Of RAS Oncogene Family	Protein Coding	39	GC03P153162	1.97215	https://www.genecards.org/cgi-bin/carddisp.pl?gene=RAP2B
SLMAP	Sarcolemma Associated Protein	Protein Coding	39	GC03P057777	1.97215	https://www.genecards.org/cgi-bin/carddisp.pl?gene=SLMAP
XAB2	XPA Binding Protein 2	Protein Coding	39	GC19M007619	1.97215	https://www.genecards.org/cgi-bin/carddisp.pl?gene=XAB2
TOE1	Target Of EGR1, Exonuclease	Protein Coding	39	GC01P045339	1.97215	https://www.genecards.org/cgi-bin/carddisp.pl?gene=TOE1
ANAPC5	Anaphase Promoting Complex Subunit 5	Protein Coding	38	GC12M121308	1.97215	https://www.genecards.org/cgi-bin/carddisp.pl?gene=ANAPC5
DCD	Dermcidin	Protein Coding	38	GC12M054644	1.97215	https://www.genecards.org/cgi-bin/carddisp.pl?gene=DCD
COPG2	COPI Coat Complex Subunit Gamma 2	Protein Coding	38	GC07M130506	1.97215	https://www.genecards.org/cgi-bin/carddisp.pl?gene=COPG2
CPSF3	Cleavage And Polyadenylation Specific Factor 3	Protein Coding	38	GC02P009423	1.97215	https://www.genecards.org/cgi-bin/carddisp.pl?gene=CPSF3
LPIN3	Lipin 3	Protein Coding	38	GC20P041340	1.97215	https://www.genecards.org/cgi-bin/carddisp.pl?gene=LPIN3
FUBP3	Far Upstream Element Binding Protein 3	Protein Coding	38	GC09P130580	1.97215	https://www.genecards.org/cgi-bin/carddisp.pl?gene=FUBP3
TWF2	Twinfilin Actin Binding Protein 2	Protein Coding	38	GC03M052228	1.97215	https://www.genecards.org/cgi-bin/carddisp.pl?gene=TWF2
TRIM26	Tripartite Motif Containing 26	Protein Coding	38	GC06M030184	1.97215	https://www.genecards.org/cgi-bin/carddisp.pl?gene=TRIM26
RAI14	Retinoic Acid Induced 14	Protein Coding	38	GC05P034656	1.97215	https://www.genecards.org/cgi-bin/carddisp.pl?gene=RAI14
ZGPAT	Zinc Finger CCCH-Type And G-Patch Domain Containing	Protein Coding	38	GC20P063707	1.97215	https://www.genecards.org/cgi-bin/carddisp.pl?gene=ZGPAT
BAG6	BAG Cochaperone 6	Protein Coding	36	GC06M031639	1.97215	https://www.genecards.org/cgi-bin/carddisp.pl?gene=BAG6
BLOC1S3	Biogenesis Of Lysosomal Organelles Complex 1 Subunit 3	Protein Coding	36	GC19P045178	1.97215	https://www.genecards.org/cgi-bin/carddisp.pl?gene=BLOC1S3
ANAPC4	Anaphase Promoting Complex Subunit 4	Protein Coding	36	GC04P025379	1.97215	https://www.genecards.org/cgi-bin/carddisp.pl?gene=ANAPC4
CNN3	Calponin 3	Protein Coding	36	GC01M094896	1.97215	https://www.genecards.org/cgi-bin/carddisp.pl?gene=CNN3
EFHD2	EF-Hand Domain Family Member D2	Protein Coding	36	GC01P015409	1.97215	https://www.genecards.org/cgi-bin/carddisp.pl?gene=EFHD2
EDEM3	ER Degradation Enhancing Alpha-Mannosidase Like Protein 3	Protein Coding	36	GC01M184690	1.97215	https://www.genecards.org/cgi-bin/carddisp.pl?gene=EDEM3
MFAP1	Microfibril Associated Protein 1	Protein Coding	36	GC15M043804	1.97215	https://www.genecards.org/cgi-bin/carddisp.pl?gene=MFAP1
NELFCD	Negative Elongation Factor Complex Member C/D	Protein Coding	36	GC20P058981	1.97215	https://www.genecards.org/cgi-bin/carddisp.pl?gene=NELFCD
PPP6R1	Protein Phosphatase 6 Regulatory Subunit 1	Protein Coding	36	GC19M055229	1.97215	https://www.genecards.org/cgi-bin/carddisp.pl?gene=PPP6R1
RPAP2	RNA Polymerase II Associated Protein 2	Protein Coding	36	GC01P092298	1.97215	https://www.genecards.org/cgi-bin/carddisp.pl?gene=RPAP2
DNAJC8	DnaJ Heat Shock Protein Family (Hsp40) Member C8	Protein Coding	35	GC01M028199	1.97215	https://www.genecards.org/cgi-bin/carddisp.pl?gene=DNAJC8
MGME1	Mitochondrial Genome Maintenance Exonuclease 1	Protein Coding	35	GC20P017952	1.97215	https://www.genecards.org/cgi-bin/carddisp.pl?gene=MGME1
LARP4	La Ribonucleoprotein 4	Protein Coding	35	GC12P050392	1.97215	https://www.genecards.org/cgi-bin/carddisp.pl?gene=LARP4
GTF3C5	General Transcription Factor IIIC Subunit 5	Protein Coding	35	GC09P133030	1.97215	https://www.genecards.org/cgi-bin/carddisp.pl?gene=GTF3C5
ERBIN	Erbb2 Interacting Protein	Protein Coding	35	GC05P065931	1.97215	https://www.genecards.org/cgi-bin/carddisp.pl?gene=ERBIN
PODXL2	Podocalyxin Like 2	Protein Coding	35	GC03P127629	1.97215	https://www.genecards.org/cgi-bin/carddisp.pl?gene=PODXL2
RBM25	RNA Binding Motif Protein 25	Protein Coding	35	GC14P073058	1.97215	https://www.genecards.org/cgi-bin/carddisp.pl?gene=RBM25
SMG5	SMG5 Nonsense Mediated MRNA Decay Factor	Protein Coding	35	GC01M156265	1.97215	https://www.genecards.org/cgi-bin/carddisp.pl?gene=SMG5
ZFP91	ZFP91 Zinc Finger Protein, Atypical E3 Ubiquitin Ligase	Protein Coding	35	GC11P058580	1.97215	https://www.genecards.org/cgi-bin/carddisp.pl?gene=ZFP91
C5orf15	Chromosome 5 Open Reading Frame 15	Protein Coding	34	GC05M133955	1.97215	https://www.genecards.org/cgi-bin/carddisp.pl?gene=C5orf15
DUS3L	Dihydrouridine Synthase 3 Like	Protein Coding	34	GC19M005786	1.97215	https://www.genecards.org/cgi-bin/carddisp.pl?gene=DUS3L
LARP4B	La Ribonucleoprotein 4B	Protein Coding	34	GC10M000806	1.97215	https://www.genecards.org/cgi-bin/carddisp.pl?gene=LARP4B
IFIT5	Interferon Induced Protein With Tetratricopeptide Repeats 5	Protein Coding	34	GC10P089414	1.97215	https://www.genecards.org/cgi-bin/carddisp.pl?gene=IFIT5
H3-3B	H3.3 Histone B	Protein Coding	34	GC17M075782	1.97215	https://www.genecards.org/cgi-bin/carddisp.pl?gene=H3-3B
RAP1GAP2	RAP1 GTPase Activating Protein 2	Protein Coding	34	GC17P002776	1.97215	https://www.genecards.org/cgi-bin/carddisp.pl?gene=RAP1GAP2
ZFC3H1	Zinc Finger C3H1-Type Containing	Protein Coding	34	GC12M071609	1.97215	https://www.genecards.org/cgi-bin/carddisp.pl?gene=ZFC3H1
NUFIP2	Nuclear FMR1 Interacting Protein 2	Protein Coding	33	GC17M030263	1.97215	https://www.genecards.org/cgi-bin/carddisp.pl?gene=NUFIP2
C7orf50	Chromosome 7 Open Reading Frame 50	Protein Coding	32	GC07M000996	1.97215	https://www.genecards.org/cgi-bin/carddisp.pl?gene=C7orf50
FAM207A	Family With Sequence Similarity 207 Member A	Protein Coding	31	GC21P044940	1.97215	https://www.genecards.org/cgi-bin/carddisp.pl?gene=FAM207A
H4C9	H4 Clustered Histone 9	Protein Coding	31	GC06P049190	1.97215	https://www.genecards.org/cgi-bin/carddisp.pl?gene=H4C9
TLE5	TLE Family Member 5, Transcriptional Modulator	Protein Coding	31	GC19M003053	1.97215	https://www.genecards.org/cgi-bin/carddisp.pl?gene=TLE5
PROSER2	Proline And Serine Rich 2	Protein Coding	29	GC10P011865	1.97215	https://www.genecards.org/cgi-bin/carddisp.pl?gene=PROSER2
H2AC14	H2A Clustered Histone 14	Protein Coding	28	GC06M029256	1.97215	https://www.genecards.org/cgi-bin/carddisp.pl?gene=H2AC14
RETREG3	Reticulophagy Regulator Family Member 3	Protein Coding	27	GC17M042581	1.97215	https://www.genecards.org/cgi-bin/carddisp.pl?gene=RETREG3
HULC	Hepatocellular Carcinoma Up-Regulated Long Non-Coding RNA	RNA Gene	21	GC06P008438	1.97215	https://www.genecards.org/cgi-bin/carddisp.pl?gene=HULC
MIR135A1	MicroRNA 135a-1	RNA Gene	20	GC03M052296	1.97215	https://www.genecards.org/cgi-bin/carddisp.pl?gene=MIR135A1
MIR33A	MicroRNA 33a	RNA Gene	19	GC22P041900	1.97215	https://www.genecards.org/cgi-bin/carddisp.pl?gene=MIR33A
MIR29C	MicroRNA 29c	RNA Gene	18	GC01M207802	1.97215	https://www.genecards.org/cgi-bin/carddisp.pl?gene=MIR29C
MIR135A2	MicroRNA 135a-2	RNA Gene	17	GC12P097563	1.97215	https://www.genecards.org/cgi-bin/carddisp.pl?gene=MIR135A2
IGH	Immunoglobulin Heavy Locus	Protein Coding	16	GC14M109774	1.97215	https://www.genecards.org/cgi-bin/carddisp.pl?gene=IGH
LYPLA2P1	LYPLA2 Pseudogene 1	Pseudogene	10	GC06M033364	1.97215	https://www.genecards.org/cgi-bin/carddisp.pl?gene=LYPLA2P1
MFN1	Mitofusin 1	Protein Coding	43	GC03P179347	1.95336	https://www.genecards.org/cgi-bin/carddisp.pl?gene=MFN1
TP53COR1	Tumor Protein P53 Pathway Corepressor 1	RNA Gene	8	GC06U903133	1.92603	https://www.genecards.org/cgi-bin/carddisp.pl?gene=TP53COR1
BCL2L1	BCL2 Like 1	Protein Coding	48	GC20M031664	1.91727	https://www.genecards.org/cgi-bin/carddisp.pl?gene=BCL2L1
MUC16	Mucin 16, Cell Surface Associated	Protein Coding	38	GC19M008848	1.91727	https://www.genecards.org/cgi-bin/carddisp.pl?gene=MUC16
AK1	Adenylate Kinase 1	Protein Coding	49	GC09M127866	1.91073	https://www.genecards.org/cgi-bin/carddisp.pl?gene=AK1
SLC25A13	Solute Carrier Family 25 Member 13	Protein Coding	47	GC07M096120	1.85298	https://www.genecards.org/cgi-bin/carddisp.pl?gene=SLC25A13
HRAS	HRas Proto-Oncogene, GTPase	Protein Coding	53	GC11M000721	1.84647	https://www.genecards.org/cgi-bin/carddisp.pl?gene=HRAS
PINK1	PTEN Induced Kinase 1	Protein Coding	48	GC01P020634	1.84647	https://www.genecards.org/cgi-bin/carddisp.pl?gene=PINK1
APP	Amyloid Beta Precursor Protein	Protein Coding	52	GC21M025880	1.83669	https://www.genecards.org/cgi-bin/carddisp.pl?gene=APP
NRF1	Nuclear Respiratory Factor 1	Protein Coding	44	GC07P129611	1.82846	https://www.genecards.org/cgi-bin/carddisp.pl?gene=NRF1
USP7	Ubiquitin Specific Peptidase 7	Protein Coding	49	GC16M008892	1.82837	https://www.genecards.org/cgi-bin/carddisp.pl?gene=USP7
CDK1	Cyclin Dependent Kinase 1	Protein Coding	47	GC10P060772	1.82837	https://www.genecards.org/cgi-bin/carddisp.pl?gene=CDK1
PIK3CG	Phosphatidylinositol-4,5-Bisphosphate 3-Kinase Catalytic Subunit Gamma	Protein Coding	49	GC07P106865	1.82585	https://www.genecards.org/cgi-bin/carddisp.pl?gene=PIK3CG
SDHA	Succinate Dehydrogenase Complex Flavoprotein Subunit A	Protein Coding	49	GC05P000208	1.81466	https://www.genecards.org/cgi-bin/carddisp.pl?gene=SDHA
CAMKK2	Calcium/Calmodulin Dependent Protein Kinase Kinase 2	Protein Coding	47	GC12M121341	1.81466	https://www.genecards.org/cgi-bin/carddisp.pl?gene=CAMKK2
GOT1	Glutamic-Oxaloacetic Transaminase 1	Protein Coding	47	GC10M099396	1.81021	https://www.genecards.org/cgi-bin/carddisp.pl?gene=GOT1
STAT1	Signal Transducer And Activator Of Transcription 1	Protein Coding	54	GC02M190908	1.80964	https://www.genecards.org/cgi-bin/carddisp.pl?gene=STAT1
ARNT	Aryl Hydrocarbon Receptor Nuclear Translocator	Protein Coding	45	GC01M150809	1.80964	https://www.genecards.org/cgi-bin/carddisp.pl?gene=ARNT
P2RX7	Purinergic Receptor P2X 7	Protein Coding	46	GC12P123032	1.80511	https://www.genecards.org/cgi-bin/carddisp.pl?gene=P2RX7
SLC25A3	Solute Carrier Family 25 Member 3	Protein Coding	46	GC12P098593	1.80511	https://www.genecards.org/cgi-bin/carddisp.pl?gene=SLC25A3
TFAM	Transcription Factor A, Mitochondrial	Protein Coding	45	GC10P058385	1.79833	https://www.genecards.org/cgi-bin/carddisp.pl?gene=TFAM
ME1	Malic Enzyme 1	Protein Coding	43	GC06M083210	1.79833	https://www.genecards.org/cgi-bin/carddisp.pl?gene=ME1
PIK3R1	Phosphoinositide-3-Kinase Regulatory Subunit 1	Protein Coding	52	GC05P068215	1.79763	https://www.genecards.org/cgi-bin/carddisp.pl?gene=PIK3R1
CASP3	Caspase 3	Protein Coding	51	GC04M184627	1.79763	https://www.genecards.org/cgi-bin/carddisp.pl?gene=CASP3
LIPE	Lipase E, Hormone Sensitive Type	Protein Coding	48	GC19M042401	1.79763	https://www.genecards.org/cgi-bin/carddisp.pl?gene=LIPE
ASL	Argininosuccinate Lyase	Protein Coding	47	GC07P066075	1.79763	https://www.genecards.org/cgi-bin/carddisp.pl?gene=ASL
GSK3B	Glycogen Synthase Kinase 3 Beta	Protein Coding	51	GC03M119821	1.78106	https://www.genecards.org/cgi-bin/carddisp.pl?gene=GSK3B
PPP2R5D	Protein Phosphatase 2 Regulatory Subunit B'Delta	Protein Coding	46	GC06P049582	1.76878	https://www.genecards.org/cgi-bin/carddisp.pl?gene=PPP2R5D
MACC1	MET Transcriptional Regulator MACC1	Protein Coding	37	GC07M020140	1.76265	https://www.genecards.org/cgi-bin/carddisp.pl?gene=MACC1
CDKN1B	Cyclin Dependent Kinase Inhibitor 1B	Protein Coding	49	GC12P012716	1.75765	https://www.genecards.org/cgi-bin/carddisp.pl?gene=CDKN1B
SCD	Stearoyl-CoA Desaturase	Protein Coding	49	GC10P100347	1.75765	https://www.genecards.org/cgi-bin/carddisp.pl?gene=SCD
SLC25A19	Solute Carrier Family 25 Member 19	Protein Coding	44	GC17M075273	1.75765	https://www.genecards.org/cgi-bin/carddisp.pl?gene=SLC25A19
NDUFS3	NADH:Ubiquinone Oxidoreductase Core Subunit S3	Protein Coding	48	GC11P047567	1.74557	https://www.genecards.org/cgi-bin/carddisp.pl?gene=NDUFS3
ACP1	Acid Phosphatase 1	Protein Coding	45	GC02P000254	1.74414	https://www.genecards.org/cgi-bin/carddisp.pl?gene=ACP1
SIX1	SIX Homeobox 1	Protein Coding	45	GC14M060643	1.73957	https://www.genecards.org/cgi-bin/carddisp.pl?gene=SIX1
STUB1	STIP1 Homology And U-Box Containing Protein 1	Protein Coding	46	GC16P001591	1.73031	https://www.genecards.org/cgi-bin/carddisp.pl?gene=STUB1
HMGB2	High Mobility Group Box 2	Protein Coding	42	GC04M173331	1.73031	https://www.genecards.org/cgi-bin/carddisp.pl?gene=HMGB2
LPL	Lipoprotein Lipase	Protein Coding	50	GC08P019901	1.71502	https://www.genecards.org/cgi-bin/carddisp.pl?gene=LPL
NQO1	NAD(P)H Quinone Dehydrogenase 1	Protein Coding	50	GC16M069706	1.71502	https://www.genecards.org/cgi-bin/carddisp.pl?gene=NQO1
MIR23A	MicroRNA 23a	RNA Gene	20	GC19M014035	1.71502	https://www.genecards.org/cgi-bin/carddisp.pl?gene=MIR23A
NDUFV1	NADH:Ubiquinone Oxidoreductase Core Subunit V1	Protein Coding	47	GC11P067644	1.70549	https://www.genecards.org/cgi-bin/carddisp.pl?gene=NDUFV1
NDUFA1	NADH:Ubiquinone Oxidoreductase Subunit A1	Protein Coding	45	GC0XP119871	1.70549	https://www.genecards.org/cgi-bin/carddisp.pl?gene=NDUFA1
MAPK1	Mitogen-Activated Protein Kinase 1	Protein Coding	53	GC22M021754	1.70391	https://www.genecards.org/cgi-bin/carddisp.pl?gene=MAPK1
MPI	Mannose Phosphate Isomerase	Protein Coding	45	GC15P074890	1.69672	https://www.genecards.org/cgi-bin/carddisp.pl?gene=MPI
AR	Androgen Receptor	Protein Coding	54	GC0XP067544	1.68625	https://www.genecards.org/cgi-bin/carddisp.pl?gene=AR
PLK1	Polo Like Kinase 1	Protein Coding	50	GC16P023909	1.68625	https://www.genecards.org/cgi-bin/carddisp.pl?gene=PLK1
USP9X	Ubiquitin Specific Peptidase 9 X-Linked	Protein Coding	48	GC0XP041085	1.68625	https://www.genecards.org/cgi-bin/carddisp.pl?gene=USP9X
CKB	Creatine Kinase B	Protein Coding	46	GC14M103519	1.68625	https://www.genecards.org/cgi-bin/carddisp.pl?gene=CKB
HUWE1	HECT, UBA And WWE Domain Containing E3 Ubiquitin Protein Ligase 1	Protein Coding	45	GC0XM053532	1.68625	https://www.genecards.org/cgi-bin/carddisp.pl?gene=HUWE1
SNAI1	Snail Family Transcriptional Repressor 1	Protein Coding	45	GC20P049982	1.68625	https://www.genecards.org/cgi-bin/carddisp.pl?gene=SNAI1
MIR340	MicroRNA 340	RNA Gene	18	GC05M180015	1.68625	https://www.genecards.org/cgi-bin/carddisp.pl?gene=MIR340
ULK1	Unc-51 Like Autophagy Activating Kinase 1	Protein Coding	46	GC12P131894	1.66347	https://www.genecards.org/cgi-bin/carddisp.pl?gene=ULK1
CTSB	Cathepsin B	Protein Coding	52	GC08M011842	1.65076	https://www.genecards.org/cgi-bin/carddisp.pl?gene=CTSB
MIR27A	MicroRNA 27a	RNA Gene	22	GC19M014034	1.65076	https://www.genecards.org/cgi-bin/carddisp.pl?gene=MIR27A
APC	APC Regulator Of WNT Signaling Pathway	Protein Coding	50	GC05P112707	1.64969	https://www.genecards.org/cgi-bin/carddisp.pl?gene=APC
SLC16A7	Solute Carrier Family 16 Member 7	Protein Coding	44	GC12P059596	1.64461	https://www.genecards.org/cgi-bin/carddisp.pl?gene=SLC16A7
SLC37A4	Solute Carrier Family 37 Member 4	Protein Coding	45	GC11M119024	1.63537	https://www.genecards.org/cgi-bin/carddisp.pl?gene=SLC37A4
IRS2	Insulin Receptor Substrate 2	Protein Coding	46	GC13M109752	1.63014	https://www.genecards.org/cgi-bin/carddisp.pl?gene=IRS2
USP5	Ubiquitin Specific Peptidase 5	Protein Coding	43	GC12P008985	1.62205	https://www.genecards.org/cgi-bin/carddisp.pl?gene=USP5
TLR4	Toll Like Receptor 4	Protein Coding	52	GC09P117704	1.6187	https://www.genecards.org/cgi-bin/carddisp.pl?gene=TLR4
TLR3	Toll Like Receptor 3	Protein Coding	53	GC04P186059	1.60192	https://www.genecards.org/cgi-bin/carddisp.pl?gene=TLR3
TF	Transferrin	Protein Coding	50	GC03P133666	1.60192	https://www.genecards.org/cgi-bin/carddisp.pl?gene=TF
SLC25A4	Solute Carrier Family 25 Member 4	Protein Coding	50	GC04P185143	1.60192	https://www.genecards.org/cgi-bin/carddisp.pl?gene=SLC25A4
HMGCR	3-Hydroxy-3-Methylglutaryl-CoA Reductase	Protein Coding	47	GC05P075336	1.60192	https://www.genecards.org/cgi-bin/carddisp.pl?gene=HMGCR
SLC25A1	Solute Carrier Family 25 Member 1	Protein Coding	47	GC22M019177	1.60192	https://www.genecards.org/cgi-bin/carddisp.pl?gene=SLC25A1
HP	Haptoglobin	Protein Coding	45	GC16P072089	1.60192	https://www.genecards.org/cgi-bin/carddisp.pl?gene=HP
GLRX	Glutaredoxin	Protein Coding	45	GC05M095752	1.60192	https://www.genecards.org/cgi-bin/carddisp.pl?gene=GLRX
VDAC2	Voltage Dependent Anion Channel 2	Protein Coding	44	GC10P075210	1.60192	https://www.genecards.org/cgi-bin/carddisp.pl?gene=VDAC2
WBP2	WW Domain Binding Protein 2	Protein Coding	41	GC17M075845	1.60192	https://www.genecards.org/cgi-bin/carddisp.pl?gene=WBP2
ATP5F1B	ATP Synthase F1 Subunit Beta	Protein Coding	34	GC12M056639	1.60192	https://www.genecards.org/cgi-bin/carddisp.pl?gene=ATP5F1B
FABP12	Fatty Acid Binding Protein 12	Protein Coding	32	GC08M081524	1.60192	https://www.genecards.org/cgi-bin/carddisp.pl?gene=FABP12
MIR361	MicroRNA 361	RNA Gene	16	GC0XM085903	1.60192	https://www.genecards.org/cgi-bin/carddisp.pl?gene=MIR361
PGM2L1	Phosphoglucomutase 2 Like 1	Protein Coding	36	GC11M074330	1.59836	https://www.genecards.org/cgi-bin/carddisp.pl?gene=PGM2L1
MIR210	MicroRNA 210	RNA Gene	21	GC11M000726	1.59792	https://www.genecards.org/cgi-bin/carddisp.pl?gene=MIR210
HK2P1	Hexokinase 2 Pseudogene 1	Pseudogene	7	GC0XM080569	1.59792	https://www.genecards.org/cgi-bin/carddisp.pl?gene=HK2P1
CLK1	CDC Like Kinase 1	Protein Coding	43	GC02M200853	1.59491	https://www.genecards.org/cgi-bin/carddisp.pl?gene=CLK1
POLG	DNA Polymerase Gamma, Catalytic Subunit	Protein Coding	46	GC15M089313	1.59169	https://www.genecards.org/cgi-bin/carddisp.pl?gene=POLG
NDUFB10	NADH:Ubiquinone Oxidoreductase Subunit B10	Protein Coding	44	GC16P002500	1.59169	https://www.genecards.org/cgi-bin/carddisp.pl?gene=NDUFB10
MAPK3	Mitogen-Activated Protein Kinase 3	Protein Coding	50	GC16M030117	1.58163	https://www.genecards.org/cgi-bin/carddisp.pl?gene=MAPK3
DBH	Dopamine Beta-Hydroxylase	Protein Coding	52	GC09P133636	1.5807	https://www.genecards.org/cgi-bin/carddisp.pl?gene=DBH
AQP1	Aquaporin 1 (Colton Blood Group)	Protein Coding	47	GC07P030911	1.5807	https://www.genecards.org/cgi-bin/carddisp.pl?gene=AQP1
SORD	Sorbitol Dehydrogenase	Protein Coding	47	GC15P045023	1.5807	https://www.genecards.org/cgi-bin/carddisp.pl?gene=SORD
KDM2B	Lysine Demethylase 2B	Protein Coding	42	GC12M121402	1.5807	https://www.genecards.org/cgi-bin/carddisp.pl?gene=KDM2B
DERA	Deoxyribose-Phosphate Aldolase	Protein Coding	39	GC12P015911	1.5807	https://www.genecards.org/cgi-bin/carddisp.pl?gene=DERA
DLAT	Dihydrolipoamide S-Acetyltransferase	Protein Coding	47	GC11P112024	1.5761	https://www.genecards.org/cgi-bin/carddisp.pl?gene=DLAT
UBA1	Ubiquitin Like Modifier Activating Enzyme 1	Protein Coding	47	GC0XP047190	1.57331	https://www.genecards.org/cgi-bin/carddisp.pl?gene=UBA1
FLT3	Fms Related Receptor Tyrosine Kinase 3	Protein Coding	53	GC13M028003	1.5685	https://www.genecards.org/cgi-bin/carddisp.pl?gene=FLT3
NEDD4	NEDD4 E3 Ubiquitin Protein Ligase	Protein Coding	47	GC15M055826	1.5685	https://www.genecards.org/cgi-bin/carddisp.pl?gene=NEDD4
BBC3	BCL2 Binding Component 3	Protein Coding	42	GC19M047220	1.5685	https://www.genecards.org/cgi-bin/carddisp.pl?gene=BBC3
TOMM20	Translocase Of Outer Mitochondrial Membrane 20	Protein Coding	41	GC01M235109	1.5685	https://www.genecards.org/cgi-bin/carddisp.pl?gene=TOMM20
MIR451A	MicroRNA 451a	RNA Gene	17	GC17M028861	1.5685	https://www.genecards.org/cgi-bin/carddisp.pl?gene=MIR451A
RPIA	Ribose 5-Phosphate Isomerase A	Protein Coding	45	GC02P088691	1.5685	https://www.genecards.org/cgi-bin/carddisp.pl?gene=RPIA
EREG	Epiregulin	Protein Coding	42	GC04P074366	1.56548	https://www.genecards.org/cgi-bin/carddisp.pl?gene=EREG
LPAR1	Lysophosphatidic Acid Receptor 1	Protein Coding	47	GC09M110873	1.55005	https://www.genecards.org/cgi-bin/carddisp.pl?gene=LPAR1
SCN1A	Sodium Voltage-Gated Channel Alpha Subunit 1	Protein Coding	47	GC02M165989	1.55005	https://www.genecards.org/cgi-bin/carddisp.pl?gene=SCN1A
RORC	RAR Related Orphan Receptor C	Protein Coding	46	GC01M151806	1.55005	https://www.genecards.org/cgi-bin/carddisp.pl?gene=RORC
LPAR3	Lysophosphatidic Acid Receptor 3	Protein Coding	45	GC01M084811	1.55005	https://www.genecards.org/cgi-bin/carddisp.pl?gene=LPAR3
PTP4A2	Protein Tyrosine Phosphatase 4A2	Protein Coding	42	GC01M031907	1.55005	https://www.genecards.org/cgi-bin/carddisp.pl?gene=PTP4A2
PRMT2	Protein Arginine Methyltransferase 2	Protein Coding	42	GC21P046635	1.55005	https://www.genecards.org/cgi-bin/carddisp.pl?gene=PRMT2
GRINA	Glutamate Ionotropic Receptor NMDA Type Subunit Associated Protein 1	Protein Coding	35	GC08P143990	1.55005	https://www.genecards.org/cgi-bin/carddisp.pl?gene=GRINA
MIR125B2	MicroRNA 125b-2	RNA Gene	21	GC21P016590	1.55005	https://www.genecards.org/cgi-bin/carddisp.pl?gene=MIR125B2
CPT2	Carnitine Palmitoyltransferase 2	Protein Coding	50	GC01P053196	1.52667	https://www.genecards.org/cgi-bin/carddisp.pl?gene=CPT2
ACAT1	Acetyl-CoA Acetyltransferase 1	Protein Coding	50	GC11P108121	1.52667	https://www.genecards.org/cgi-bin/carddisp.pl?gene=ACAT1
RAC1	Rac Family Small GTPase 1	Protein Coding	50	GC07P006377	1.52667	https://www.genecards.org/cgi-bin/carddisp.pl?gene=RAC1
CDC25C	Cell Division Cycle 25C	Protein Coding	49	GC05M138285	1.52667	https://www.genecards.org/cgi-bin/carddisp.pl?gene=CDC25C
PLIN2	Perilipin 2	Protein Coding	44	GC09M019121	1.52667	https://www.genecards.org/cgi-bin/carddisp.pl?gene=PLIN2
IL7	Interleukin 7	Protein Coding	43	GC08M078689	1.52667	https://www.genecards.org/cgi-bin/carddisp.pl?gene=IL7
GTPBP3	GTP Binding Protein 3, Mitochondrial	Protein Coding	41	GC19P024450	1.52667	https://www.genecards.org/cgi-bin/carddisp.pl?gene=GTPBP3
SNHG3	Small Nucleolar RNA Host Gene 3	RNA Gene	17	GC01P028506	1.51717	https://www.genecards.org/cgi-bin/carddisp.pl?gene=SNHG3
BCS1L	BCS1 Homolog, Ubiquinol-Cytochrome C Reductase Complex Chaperone	Protein Coding	45	GC02P218658	1.51182	https://www.genecards.org/cgi-bin/carddisp.pl?gene=BCS1L
NDUFAF1	NADH:Ubiquinone Oxidoreductase Complex Assembly Factor 1	Protein Coding	42	GC15M041387	1.51182	https://www.genecards.org/cgi-bin/carddisp.pl?gene=NDUFAF1
MT-ND2	Mitochondrially Encoded NADH:Ubiquinone Oxidoreductase Core Subunit 2	Protein Coding	34	GCMTP004472	1.51182	https://www.genecards.org/cgi-bin/carddisp.pl?gene=MT-ND2
ABCB1	ATP Binding Cassette Subfamily B Member 1	Protein Coding	52	GC07M087504	1.50259	https://www.genecards.org/cgi-bin/carddisp.pl?gene=ABCB1
PRDX1	Peroxiredoxin 1	Protein Coding	49	GC01M045511	1.50259	https://www.genecards.org/cgi-bin/carddisp.pl?gene=PRDX1
PIK3C2A	Phosphatidylinositol-4-Phosphate 3-Kinase Catalytic Subunit Type 2 Alpha	Protein Coding	48	GC11M017211	1.50259	https://www.genecards.org/cgi-bin/carddisp.pl?gene=PIK3C2A
ACACB	Acetyl-CoA Carboxylase Beta	Protein Coding	47	GC12P109116	1.50259	https://www.genecards.org/cgi-bin/carddisp.pl?gene=ACACB
ATP5F1A	ATP Synthase F1 Subunit Alpha	Protein Coding	37	GC18M046081	1.50259	https://www.genecards.org/cgi-bin/carddisp.pl?gene=ATP5F1A
GLP1R	Glucagon Like Peptide 1 Receptor	Protein Coding	47	GC06P039048	1.48863	https://www.genecards.org/cgi-bin/carddisp.pl?gene=GLP1R
MINPP1	Multiple Inositol-Polyphosphate Phosphatase 1	Protein Coding	46	GC10P087504	1.46833	https://www.genecards.org/cgi-bin/carddisp.pl?gene=MINPP1
FGFR4	Fibroblast Growth Factor Receptor 4	Protein Coding	53	GC05P177086	1.46776	https://www.genecards.org/cgi-bin/carddisp.pl?gene=FGFR4
MMP1	Matrix Metallopeptidase 1	Protein Coding	52	GC11M102810	1.46776	https://www.genecards.org/cgi-bin/carddisp.pl?gene=MMP1
PGR	Progesterone Receptor	Protein Coding	52	GC11M101030	1.46776	https://www.genecards.org/cgi-bin/carddisp.pl?gene=PGR
KCNJ11	Potassium Inwardly Rectifying Channel Subfamily J Member 11	Protein Coding	49	GC11M017385	1.46776	https://www.genecards.org/cgi-bin/carddisp.pl?gene=KCNJ11
GNB3	G Protein Subunit Beta 3	Protein Coding	49	GC12P006839	1.46776	https://www.genecards.org/cgi-bin/carddisp.pl?gene=GNB3
GK	Glycerol Kinase	Protein Coding	48	GC0XP030691	1.46776	https://www.genecards.org/cgi-bin/carddisp.pl?gene=GK
ACADM	Acyl-CoA Dehydrogenase Medium Chain	Protein Coding	47	GC01P075724	1.46776	https://www.genecards.org/cgi-bin/carddisp.pl?gene=ACADM
SLC25A12	Solute Carrier Family 25 Member 12	Protein Coding	47	GC02M171783	1.46776	https://www.genecards.org/cgi-bin/carddisp.pl?gene=SLC25A12
IGFBP3	Insulin Like Growth Factor Binding Protein 3	Protein Coding	46	GC07M045912	1.46776	https://www.genecards.org/cgi-bin/carddisp.pl?gene=IGFBP3
EHHADH	Enoyl-CoA Hydratase And 3-Hydroxyacyl CoA Dehydrogenase	Protein Coding	45	GC03M185190	1.46776	https://www.genecards.org/cgi-bin/carddisp.pl?gene=EHHADH
PMM1	Phosphomannomutase 1	Protein Coding	41	GC22M041576	1.46776	https://www.genecards.org/cgi-bin/carddisp.pl?gene=PMM1
FNDC5	Fibronectin Type III Domain Containing 5	Protein Coding	35	GC01M032864	1.46776	https://www.genecards.org/cgi-bin/carddisp.pl?gene=FNDC5
MT-ND5	Mitochondrially Encoded NADH:Ubiquinone Oxidoreductase Core Subunit 5	Protein Coding	34	GCMTP012339	1.46776	https://www.genecards.org/cgi-bin/carddisp.pl?gene=MT-ND5
PCGEM1	PCGEM1 Prostate-Specific Transcript	RNA Gene	19	GC02P192749	1.46776	https://www.genecards.org/cgi-bin/carddisp.pl?gene=PCGEM1
CASC9	Cancer Susceptibility 9	RNA Gene	15	GC08M075132	1.46776	https://www.genecards.org/cgi-bin/carddisp.pl?gene=CASC9
ACTG1P25	Actin Gamma 1 Pseudogene 25	Pseudogene	8	GC01P202864	1.46776	https://www.genecards.org/cgi-bin/carddisp.pl?gene=ACTG1P25
NR1H2	Nuclear Receptor Subfamily 1 Group H Member 2	Protein Coding	49	GC19P050329	1.45996	https://www.genecards.org/cgi-bin/carddisp.pl?gene=NR1H2
CYB5R3	Cytochrome B5 Reductase 3	Protein Coding	46	GC22M042617	1.45996	https://www.genecards.org/cgi-bin/carddisp.pl?gene=CYB5R3
AGER	Advanced Glycosylation End-Product Specific Receptor	Protein Coding	45	GC06M032180	1.45996	https://www.genecards.org/cgi-bin/carddisp.pl?gene=AGER
IAPP	Islet Amyloid Polypeptide	Protein Coding	42	GC12P021354	1.45996	https://www.genecards.org/cgi-bin/carddisp.pl?gene=IAPP
LDHAL6A	Lactate Dehydrogenase A Like 6A	Protein Coding	37	GC11P018456	1.4417	https://www.genecards.org/cgi-bin/carddisp.pl?gene=LDHAL6A
AKT3	AKT Serine/Threonine Kinase 3	Protein Coding	54	GC01M243488	1.42633	https://www.genecards.org/cgi-bin/carddisp.pl?gene=AKT3
TWIST1	Twist Family BHLH Transcription Factor 1	Protein Coding	47	GC07M019020	1.42633	https://www.genecards.org/cgi-bin/carddisp.pl?gene=TWIST1
SLC16A8	Solute Carrier Family 16 Member 8	Protein Coding	39	GC22M047268	1.39735	https://www.genecards.org/cgi-bin/carddisp.pl?gene=SLC16A8
CALR	Calreticulin	Protein Coding	52	GC19P012938	1.3957	https://www.genecards.org/cgi-bin/carddisp.pl?gene=CALR
ACTG1	Actin Gamma 1	Protein Coding	51	GC17M081509	1.3957	https://www.genecards.org/cgi-bin/carddisp.pl?gene=ACTG1
CDH1	Cadherin 1	Protein Coding	51	GC16P068737	1.3957	https://www.genecards.org/cgi-bin/carddisp.pl?gene=CDH1
EEF2	Eukaryotic Translation Elongation Factor 2	Protein Coding	49	GC19M003976	1.3957	https://www.genecards.org/cgi-bin/carddisp.pl?gene=EEF2
SIRT2	Sirtuin 2	Protein Coding	49	GC19M038878	1.3957	https://www.genecards.org/cgi-bin/carddisp.pl?gene=SIRT2
PDX1	Pancreatic And Duodenal Homeobox 1	Protein Coding	49	GC13P027921	1.3957	https://www.genecards.org/cgi-bin/carddisp.pl?gene=PDX1
XPO1	Exportin 1	Protein Coding	47	GC02M061445	1.3957	https://www.genecards.org/cgi-bin/carddisp.pl?gene=XPO1
EIF2AK4	Eukaryotic Translation Initiation Factor 2 Alpha Kinase 4	Protein Coding	46	GC15P039934	1.3957	https://www.genecards.org/cgi-bin/carddisp.pl?gene=EIF2AK4
MIP	Major Intrinsic Protein Of Lens Fiber	Protein Coding	42	GC12M056449	1.3957	https://www.genecards.org/cgi-bin/carddisp.pl?gene=MIP
ACSS1	Acyl-CoA Synthetase Short Chain Family Member 1	Protein Coding	41	GC20M024986	1.38312	https://www.genecards.org/cgi-bin/carddisp.pl?gene=ACSS1
GLDC	Glycine Decarboxylase	Protein Coding	49	GC09M006522	1.37508	https://www.genecards.org/cgi-bin/carddisp.pl?gene=GLDC
CCND3	Cyclin D3	Protein Coding	49	GC06M041934	1.37278	https://www.genecards.org/cgi-bin/carddisp.pl?gene=CCND3
ATN1	Atrophin 1	Protein Coding	45	GC12P009000	1.37278	https://www.genecards.org/cgi-bin/carddisp.pl?gene=ATN1
TSPO	Translocator Protein	Protein Coding	44	GC22P043151	1.37278	https://www.genecards.org/cgi-bin/carddisp.pl?gene=TSPO
BLVRB	Biliverdin Reductase B	Protein Coding	41	GC19M040447	1.37278	https://www.genecards.org/cgi-bin/carddisp.pl?gene=BLVRB
DUSP19	Dual Specificity Phosphatase 19	Protein Coding	40	GC02P183078	1.37278	https://www.genecards.org/cgi-bin/carddisp.pl?gene=DUSP19
KLF10	Kruppel Like Factor 10	Protein Coding	43	GC08M102648	1.34727	https://www.genecards.org/cgi-bin/carddisp.pl?gene=KLF10
MR1	Major Histocompatibility Complex, Class I-Related	Protein Coding	43	GC01P181033	1.34727	https://www.genecards.org/cgi-bin/carddisp.pl?gene=MR1
ADSS1	Adenylosuccinate Synthase 1	Protein Coding	36	GC14P105059	1.34727	https://www.genecards.org/cgi-bin/carddisp.pl?gene=ADSS1
SLC25A51	Solute Carrier Family 25 Member 51	Protein Coding	34	GC09M037878	1.34727	https://www.genecards.org/cgi-bin/carddisp.pl?gene=SLC25A51
MACIR	Macrophage Immunometabolism Regulator	Protein Coding	26	GC05P103259	1.34727	https://www.genecards.org/cgi-bin/carddisp.pl?gene=MACIR
ANXA1	Annexin A1	Protein Coding	50	GC09P073151	1.34686	https://www.genecards.org/cgi-bin/carddisp.pl?gene=ANXA1
STAT5B	Signal Transducer And Activator Of Transcription 5B	Protein Coding	50	GC17M042199	1.34686	https://www.genecards.org/cgi-bin/carddisp.pl?gene=STAT5B
PLA2G2A	Phospholipase A2 Group IIA	Protein Coding	48	GC01M019975	1.34686	https://www.genecards.org/cgi-bin/carddisp.pl?gene=PLA2G2A
HMGA1	High Mobility Group AT-Hook 1	Protein Coding	47	GC06P049472	1.34686	https://www.genecards.org/cgi-bin/carddisp.pl?gene=HMGA1
AGL	Amylo-Alpha-1, 6-Glucosidase, 4-Alpha-Glucanotransferase	Protein Coding	46	GC01P099850	1.34686	https://www.genecards.org/cgi-bin/carddisp.pl?gene=AGL
ERN1	Endoplasmic Reticulum To Nucleus Signaling 1	Protein Coding	46	GC17M064039	1.34686	https://www.genecards.org/cgi-bin/carddisp.pl?gene=ERN1
ATG7	Autophagy Related 7	Protein Coding	43	GC03P011273	1.34686	https://www.genecards.org/cgi-bin/carddisp.pl?gene=ATG7
SREBF2	Sterol Regulatory Element Binding Transcription Factor 2	Protein Coding	43	GC22P041833	1.34686	https://www.genecards.org/cgi-bin/carddisp.pl?gene=SREBF2
H2AX	H2A.X Variant Histone	Protein Coding	36	GC11M119097	1.34686	https://www.genecards.org/cgi-bin/carddisp.pl?gene=H2AX
NSD2	Nuclear Receptor Binding SET Domain Protein 2	Protein Coding	36	GC04P001872	1.34686	https://www.genecards.org/cgi-bin/carddisp.pl?gene=NSD2
MT-CO1	Mitochondrially Encoded Cytochrome C Oxidase I	Protein Coding	34	GCMTP005906	1.34686	https://www.genecards.org/cgi-bin/carddisp.pl?gene=MT-CO1
MIR31	MicroRNA 31	RNA Gene	20	GC09M021513	1.34686	https://www.genecards.org/cgi-bin/carddisp.pl?gene=MIR31
LINC01139	Long Intergenic Non-Protein Coding RNA 1139	RNA Gene	16	GC01M238480	1.34686	https://www.genecards.org/cgi-bin/carddisp.pl?gene=LINC01139
SLC2A5	Solute Carrier Family 2 Member 5	Protein Coding	45	GC01M009036	1.3286	https://www.genecards.org/cgi-bin/carddisp.pl?gene=SLC2A5
PGM2	Phosphoglucomutase 2	Protein Coding	42	GC04P037849	1.3286	https://www.genecards.org/cgi-bin/carddisp.pl?gene=PGM2
CDK4	Cyclin Dependent Kinase 4	Protein Coding	55	GC12M057743	1.31345	https://www.genecards.org/cgi-bin/carddisp.pl?gene=CDK4
CDK5	Cyclin Dependent Kinase 5	Protein Coding	54	GC07M151053	1.31345	https://www.genecards.org/cgi-bin/carddisp.pl?gene=CDK5
PTPN1	Protein Tyrosine Phosphatase Non-Receptor Type 1	Protein Coding	52	GC20P050510	1.31345	https://www.genecards.org/cgi-bin/carddisp.pl?gene=PTPN1
KAT2B	Lysine Acetyltransferase 2B	Protein Coding	49	GC03P020081	1.31345	https://www.genecards.org/cgi-bin/carddisp.pl?gene=KAT2B
PHB	Prohibitin	Protein Coding	49	GC17M049404	1.31345	https://www.genecards.org/cgi-bin/carddisp.pl?gene=PHB
PGRMC1	Progesterone Receptor Membrane Component 1	Protein Coding	45	GC0XP119236	1.31345	https://www.genecards.org/cgi-bin/carddisp.pl?gene=PGRMC1
USP24	Ubiquitin Specific Peptidase 24	Protein Coding	44	GC01M055066	1.31345	https://www.genecards.org/cgi-bin/carddisp.pl?gene=USP24
MICB	MHC Class I Polypeptide-Related Sequence B	Protein Coding	42	GC06P049346	1.31345	https://www.genecards.org/cgi-bin/carddisp.pl?gene=MICB
MICA	MHC Class I Polypeptide-Related Sequence A	Protein Coding	39	GC06P031399	1.31345	https://www.genecards.org/cgi-bin/carddisp.pl?gene=MICA
NTPCR	Nucleoside-Triphosphatase, Cancer-Related	Protein Coding	38	GC01P232950	1.31345	https://www.genecards.org/cgi-bin/carddisp.pl?gene=NTPCR
HACD3	3-Hydroxyacyl-CoA Dehydratase 3	Protein Coding	36	GC15P065530	1.31345	https://www.genecards.org/cgi-bin/carddisp.pl?gene=HACD3
MIF	Macrophage Migration Inhibitory Factor	Protein Coding	50	GC22P023894	1.29292	https://www.genecards.org/cgi-bin/carddisp.pl?gene=MIF
LRRK2	Leucine Rich Repeat Kinase 2	Protein Coding	50	GC12P040196	1.29292	https://www.genecards.org/cgi-bin/carddisp.pl?gene=LRRK2
MAX	MYC Associated Factor X	Protein Coding	49	GC14M065009	1.29292	https://www.genecards.org/cgi-bin/carddisp.pl?gene=MAX
TFRC	Transferrin Receptor	Protein Coding	49	GC03M196027	1.29292	https://www.genecards.org/cgi-bin/carddisp.pl?gene=TFRC
ADORA2B	Adenosine A2b Receptor	Protein Coding	48	GC17P015927	1.29292	https://www.genecards.org/cgi-bin/carddisp.pl?gene=ADORA2B
SPHK1	Sphingosine Kinase 1	Protein Coding	48	GC17P076376	1.29292	https://www.genecards.org/cgi-bin/carddisp.pl?gene=SPHK1
DDX5	DEAD-Box Helicase 5	Protein Coding	47	GC17M064498	1.29292	https://www.genecards.org/cgi-bin/carddisp.pl?gene=DDX5
NME2	NME/NM23 Nucleoside Diphosphate Kinase 2	Protein Coding	47	GC17P051165	1.29292	https://www.genecards.org/cgi-bin/carddisp.pl?gene=NME2
CYC1	Cytochrome C1	Protein Coding	46	GC08P144095	1.29292	https://www.genecards.org/cgi-bin/carddisp.pl?gene=CYC1
NNT	Nicotinamide Nucleotide Transhydrogenase	Protein Coding	46	GC05P043604	1.29292	https://www.genecards.org/cgi-bin/carddisp.pl?gene=NNT
PNPLA2	Patatin Like Phospholipase Domain Containing 2	Protein Coding	46	GC11P000905	1.29292	https://www.genecards.org/cgi-bin/carddisp.pl?gene=PNPLA2
SELP	Selectin P	Protein Coding	46	GC01M169558	1.29292	https://www.genecards.org/cgi-bin/carddisp.pl?gene=SELP
FUS	FUS RNA Binding Protein	Protein Coding	45	GC16P031180	1.29292	https://www.genecards.org/cgi-bin/carddisp.pl?gene=FUS
SERPINA3	Serpin Family A Member 3	Protein Coding	44	GC14P094612	1.29292	https://www.genecards.org/cgi-bin/carddisp.pl?gene=SERPINA3
ETHE1	ETHE1 Persulfide Dioxygenase	Protein Coding	43	GC19M043506	1.29292	https://www.genecards.org/cgi-bin/carddisp.pl?gene=ETHE1
NODAL	Nodal Growth Differentiation Factor	Protein Coding	43	GC10M070431	1.29292	https://www.genecards.org/cgi-bin/carddisp.pl?gene=NODAL
SMAD5	SMAD Family Member 5	Protein Coding	43	GC05P136132	1.29292	https://www.genecards.org/cgi-bin/carddisp.pl?gene=SMAD5
CISD2	CDGSH Iron Sulfur Domain 2	Protein Coding	42	GC04P102868	1.29292	https://www.genecards.org/cgi-bin/carddisp.pl?gene=CISD2
AK4	Adenylate Kinase 4	Protein Coding	41	GC01P065147	1.29292	https://www.genecards.org/cgi-bin/carddisp.pl?gene=AK4
PDLIM5	PDZ And LIM Domain 5	Protein Coding	41	GC04P094451	1.29292	https://www.genecards.org/cgi-bin/carddisp.pl?gene=PDLIM5
TRIM35	Tripartite Motif Containing 35	Protein Coding	38	GC08M027284	1.29292	https://www.genecards.org/cgi-bin/carddisp.pl?gene=TRIM35
ELOC	Elongin C	Protein Coding	35	GC08M073939	1.29292	https://www.genecards.org/cgi-bin/carddisp.pl?gene=ELOC
ELOB	Elongin B	Protein Coding	34	GC16M002772	1.29292	https://www.genecards.org/cgi-bin/carddisp.pl?gene=ELOB
MIR138-1	MicroRNA 138-1	RNA Gene	19	GC03P044115	1.27638	https://www.genecards.org/cgi-bin/carddisp.pl?gene=MIR138-1
MDM2	MDM2 Proto-Oncogene	Protein Coding	54	GC12P068808	1.27161	https://www.genecards.org/cgi-bin/carddisp.pl?gene=MDM2
CASP8	Caspase 8	Protein Coding	53	GC02P201233	1.27161	https://www.genecards.org/cgi-bin/carddisp.pl?gene=CASP8
MMP9	Matrix Metallopeptidase 9	Protein Coding	53	GC20P046008	1.27161	https://www.genecards.org/cgi-bin/carddisp.pl?gene=MMP9
PLA2G6	Phospholipase A2 Group VI	Protein Coding	49	GC22M047232	1.27161	https://www.genecards.org/cgi-bin/carddisp.pl?gene=PLA2G6
GAA	Alpha Glucosidase	Protein Coding	48	GC17P080101	1.27161	https://www.genecards.org/cgi-bin/carddisp.pl?gene=GAA
SPP1	Secreted Phosphoprotein 1	Protein Coding	47	GC04P087975	1.27161	https://www.genecards.org/cgi-bin/carddisp.pl?gene=SPP1
ACADVL	Acyl-CoA Dehydrogenase Very Long Chain	Protein Coding	46	GC17P007219	1.27161	https://www.genecards.org/cgi-bin/carddisp.pl?gene=ACADVL
HMGB1	High Mobility Group Box 1	Protein Coding	45	GC13M030456	1.27161	https://www.genecards.org/cgi-bin/carddisp.pl?gene=HMGB1
MLYCD	Malonyl-CoA Decarboxylase	Protein Coding	43	GC16P083899	1.27161	https://www.genecards.org/cgi-bin/carddisp.pl?gene=MLYCD
STC1	Stanniocalcin 1	Protein Coding	41	GC08M023841	1.27161	https://www.genecards.org/cgi-bin/carddisp.pl?gene=STC1
NPAS3	Neuronal PAS Domain Protein 3	Protein Coding	40	GC14P032934	1.27161	https://www.genecards.org/cgi-bin/carddisp.pl?gene=NPAS3
EIF3E	Eukaryotic Translation Initiation Factor 3 Subunit E	Protein Coding	39	GC08M108163	1.27161	https://www.genecards.org/cgi-bin/carddisp.pl?gene=EIF3E
RTCB	RNA 2',3'-Cyclic Phosphate And 5'-OH Ligase	Protein Coding	36	GC22M032387	1.27161	https://www.genecards.org/cgi-bin/carddisp.pl?gene=RTCB
MIR199A2	MicroRNA 199a-2	RNA Gene	19	GC01M172235	1.27161	https://www.genecards.org/cgi-bin/carddisp.pl?gene=MIR199A2
MIR98	MicroRNA 98	RNA Gene	17	GC0XM053585	1.27161	https://www.genecards.org/cgi-bin/carddisp.pl?gene=MIR98
GAPDHP44	Glyceraldehyde 3 Phosphate Dehydrogenase Pseudogene 44	Pseudogene	9	GC12P062755	1.27161	https://www.genecards.org/cgi-bin/carddisp.pl?gene=GAPDHP44
PSEN1	Presenilin 1	Protein Coding	53	GC14P073136	1.24695	https://www.genecards.org/cgi-bin/carddisp.pl?gene=PSEN1
PIP5K1C	Phosphatidylinositol-4-Phosphate 5-Kinase Type 1 Gamma	Protein Coding	49	GC19M003631	1.24695	https://www.genecards.org/cgi-bin/carddisp.pl?gene=PIP5K1C
ERG	ETS Transcription Factor ERG	Protein Coding	47	GC21M038367	1.24695	https://www.genecards.org/cgi-bin/carddisp.pl?gene=ERG
BACH1	BTB Domain And CNC Homolog 1	Protein Coding	42	GC21P029194	1.24695	https://www.genecards.org/cgi-bin/carddisp.pl?gene=BACH1
CCDC88A	Coiled-Coil Domain Containing 88A	Protein Coding	41	GC02M055287	1.24695	https://www.genecards.org/cgi-bin/carddisp.pl?gene=CCDC88A
MAGI3	Membrane Associated Guanylate Kinase, WW And PDZ Domain Containing 3	Protein Coding	36	GC01P113390	1.24695	https://www.genecards.org/cgi-bin/carddisp.pl?gene=MAGI3
H2BC8	H2B Clustered Histone 8	Protein Coding	27	GC06M027823	1.24695	https://www.genecards.org/cgi-bin/carddisp.pl?gene=H2BC8
MIR34C	MicroRNA 34c	RNA Gene	20	GC11P111591	1.24695	https://www.genecards.org/cgi-bin/carddisp.pl?gene=MIR34C
ZNF224	Zinc Finger Protein 224	Protein Coding	39	GC19P044094	1.2239	https://www.genecards.org/cgi-bin/carddisp.pl?gene=ZNF224
SLC16A5	Solute Carrier Family 16 Member 5	Protein Coding	35	GC17P075170	1.22251	https://www.genecards.org/cgi-bin/carddisp.pl?gene=SLC16A5
CTSD	Cathepsin D	Protein Coding	53	GC11M001752	1.2127	https://www.genecards.org/cgi-bin/carddisp.pl?gene=CTSD
NOS3	Nitric Oxide Synthase 3	Protein Coding	52	GC07P150990	1.2127	https://www.genecards.org/cgi-bin/carddisp.pl?gene=NOS3
NGF	Nerve Growth Factor	Protein Coding	51	GC01M115285	1.2127	https://www.genecards.org/cgi-bin/carddisp.pl?gene=NGF
SERPINE1	Serpin Family E Member 1	Protein Coding	51	GC07P101127	1.2127	https://www.genecards.org/cgi-bin/carddisp.pl?gene=SERPINE1
CREB1	CAMP Responsive Element Binding Protein 1	Protein Coding	50	GC02P207529	1.2127	https://www.genecards.org/cgi-bin/carddisp.pl?gene=CREB1
HDAC3	Histone Deacetylase 3	Protein Coding	50	GC05M141583	1.2127	https://www.genecards.org/cgi-bin/carddisp.pl?gene=HDAC3
MYH9	Myosin Heavy Chain 9	Protein Coding	50	GC22M036281	1.2127	https://www.genecards.org/cgi-bin/carddisp.pl?gene=MYH9
NOS1	Nitric Oxide Synthase 1	Protein Coding	50	GC12M117208	1.2127	https://www.genecards.org/cgi-bin/carddisp.pl?gene=NOS1
NR2F2	Nuclear Receptor Subfamily 2 Group F Member 2	Protein Coding	50	GC15P096325	1.2127	https://www.genecards.org/cgi-bin/carddisp.pl?gene=NR2F2
RB1	RB Transcriptional Corepressor 1	Protein Coding	50	GC13P048303	1.2127	https://www.genecards.org/cgi-bin/carddisp.pl?gene=RB1
DICER1	Dicer 1, Ribonuclease III	Protein Coding	49	GC14M095086	1.2127	https://www.genecards.org/cgi-bin/carddisp.pl?gene=DICER1
IKBKG	Inhibitor Of Nuclear Factor Kappa B Kinase Regulatory Subunit Gamma	Protein Coding	49	GC0XP154541	1.2127	https://www.genecards.org/cgi-bin/carddisp.pl?gene=IKBKG
CDC25A	Cell Division Cycle 25A	Protein Coding	49	GC03M048173	1.2127	https://www.genecards.org/cgi-bin/carddisp.pl?gene=CDC25A
PIK3CB	Phosphatidylinositol-4,5-Bisphosphate 3-Kinase Catalytic Subunit Beta	Protein Coding	49	GC03M138652	1.2127	https://www.genecards.org/cgi-bin/carddisp.pl?gene=PIK3CB
RUNX1	RUNX Family Transcription Factor 1	Protein Coding	49	GC21M034787	1.2127	https://www.genecards.org/cgi-bin/carddisp.pl?gene=RUNX1
RUNX2	RUNX Family Transcription Factor 2	Protein Coding	49	GC06P049605	1.2127	https://www.genecards.org/cgi-bin/carddisp.pl?gene=RUNX2
PTGS2	Prostaglandin-Endoperoxide Synthase 2	Protein Coding	49	GC01M186640	1.2127	https://www.genecards.org/cgi-bin/carddisp.pl?gene=PTGS2
IL10	Interleukin 10	Protein Coding	48	GC01M206767	1.2127	https://www.genecards.org/cgi-bin/carddisp.pl?gene=IL10
GABBR1	Gamma-Aminobutyric Acid Type B Receptor Subunit 1	Protein Coding	48	GC06M029555	1.2127	https://www.genecards.org/cgi-bin/carddisp.pl?gene=GABBR1
PPARD	Peroxisome Proliferator Activated Receptor Delta	Protein Coding	48	GC06P049491	1.2127	https://www.genecards.org/cgi-bin/carddisp.pl?gene=PPARD
GNB1	G Protein Subunit Beta 1	Protein Coding	47	GC01M001785	1.2127	https://www.genecards.org/cgi-bin/carddisp.pl?gene=GNB1
CYBB	Cytochrome B-245 Beta Chain	Protein Coding	47	GC0XP037780	1.2127	https://www.genecards.org/cgi-bin/carddisp.pl?gene=CYBB
NEFH	Neurofilament Heavy	Protein Coding	47	GC22P029480	1.2127	https://www.genecards.org/cgi-bin/carddisp.pl?gene=NEFH
POU5F1	POU Class 5 Homeobox 1	Protein Coding	47	GC06M032910	1.2127	https://www.genecards.org/cgi-bin/carddisp.pl?gene=POU5F1
STAT5A	Signal Transducer And Activator Of Transcription 5A	Protein Coding	47	GC17P042287	1.2127	https://www.genecards.org/cgi-bin/carddisp.pl?gene=STAT5A
TPT1	Tumor Protein, Translationally-Controlled 1	Protein Coding	47	GC13M045333	1.2127	https://www.genecards.org/cgi-bin/carddisp.pl?gene=TPT1
ADORA2A	Adenosine A2a Receptor	Protein Coding	46	GC22P024417	1.2127	https://www.genecards.org/cgi-bin/carddisp.pl?gene=ADORA2A
HNF1B	HNF1 Homeobox B	Protein Coding	45	GC17M037686	1.2127	https://www.genecards.org/cgi-bin/carddisp.pl?gene=HNF1B
FABP4	Fatty Acid Binding Protein 4	Protein Coding	45	GC08M081478	1.2127	https://www.genecards.org/cgi-bin/carddisp.pl?gene=FABP4
FABP1	Fatty Acid Binding Protein 1	Protein Coding	44	GC02M088122	1.2127	https://www.genecards.org/cgi-bin/carddisp.pl?gene=FABP1
INPP1	Inositol Polyphosphate-1-Phosphatase	Protein Coding	43	GC02P190343	1.2127	https://www.genecards.org/cgi-bin/carddisp.pl?gene=INPP1
NEK3	NIMA Related Kinase 3	Protein Coding	43	GC13M052132	1.2127	https://www.genecards.org/cgi-bin/carddisp.pl?gene=NEK3
TRPM2	Transient Receptor Potential Cation Channel Subfamily M Member 2	Protein Coding	43	GC21P044350	1.2127	https://www.genecards.org/cgi-bin/carddisp.pl?gene=TRPM2
NTS	Neurotensin	Protein Coding	42	GC12P085876	1.2127	https://www.genecards.org/cgi-bin/carddisp.pl?gene=NTS
FABP5	Fatty Acid Binding Protein 5	Protein Coding	42	GC08P081282	1.2127	https://www.genecards.org/cgi-bin/carddisp.pl?gene=FABP5
KLF2	Kruppel Like Factor 2	Protein Coding	41	GC19P024426	1.2127	https://www.genecards.org/cgi-bin/carddisp.pl?gene=KLF2
MRPL12	Mitochondrial Ribosomal Protein L12	Protein Coding	41	GC17P081704	1.2127	https://www.genecards.org/cgi-bin/carddisp.pl?gene=MRPL12
SENP2	SUMO Specific Peptidase 2	Protein Coding	41	GC03P185582	1.2127	https://www.genecards.org/cgi-bin/carddisp.pl?gene=SENP2
PSMD10	Proteasome 26S Subunit, Non-ATPase 10	Protein Coding	41	GC0XM108084	1.2127	https://www.genecards.org/cgi-bin/carddisp.pl?gene=PSMD10
PMAIP1	Phorbol-12-Myristate-13-Acetate-Induced Protein 1	Protein Coding	40	GC18P059899	1.2127	https://www.genecards.org/cgi-bin/carddisp.pl?gene=PMAIP1
STOML2	Stomatin Like 2	Protein Coding	39	GC09M035099	1.2127	https://www.genecards.org/cgi-bin/carddisp.pl?gene=STOML2
GPER1	G Protein-Coupled Estrogen Receptor 1	Protein Coding	38	GC07P001247	1.2127	https://www.genecards.org/cgi-bin/carddisp.pl?gene=GPER1
TKTL2	Transketolase Like 2	Protein Coding	38	GC04M163471	1.2127	https://www.genecards.org/cgi-bin/carddisp.pl?gene=TKTL2
PGP	Phosphoglycolate Phosphatase	Protein Coding	38	GC16M002440	1.2127	https://www.genecards.org/cgi-bin/carddisp.pl?gene=PGP
OGA	O-GlcNAcase	Protein Coding	33	GC10M101785	1.2127	https://www.genecards.org/cgi-bin/carddisp.pl?gene=OGA
CIP2A	Cellular Inhibitor Of PP2A	Protein Coding	29	GC03M108545	1.2127	https://www.genecards.org/cgi-bin/carddisp.pl?gene=CIP2A
MIR150	MicroRNA 150	RNA Gene	21	GC19M049500	1.2127	https://www.genecards.org/cgi-bin/carddisp.pl?gene=MIR150
MIR30A	MicroRNA 30a	RNA Gene	20	GC06M071403	1.2127	https://www.genecards.org/cgi-bin/carddisp.pl?gene=MIR30A
MIR137	MicroRNA 137	RNA Gene	19	GC01M098046	1.2127	https://www.genecards.org/cgi-bin/carddisp.pl?gene=MIR137
MIR216A	MicroRNA 216a	RNA Gene	19	GC02M055988	1.2127	https://www.genecards.org/cgi-bin/carddisp.pl?gene=MIR216A
BCAR4	Breast Cancer Anti-Estrogen Resistance 4	RNA Gene	17	GC16M011819	1.2127	https://www.genecards.org/cgi-bin/carddisp.pl?gene=BCAR4
LINC00504	Long Intergenic Non-Protein Coding RNA 504	RNA Gene	15	GC04M014476	1.2127	https://www.genecards.org/cgi-bin/carddisp.pl?gene=LINC00504
MIR1244-1	MicroRNA 1244-1	RNA Gene	12	GC02P231713	1.2127	https://www.genecards.org/cgi-bin/carddisp.pl?gene=MIR1244-1
GOT2	Glutamic-Oxaloacetic Transaminase 2	Protein Coding	47	GC16M058707	1.19444	https://www.genecards.org/cgi-bin/carddisp.pl?gene=GOT2
G6PC3	Glucose-6-Phosphatase Catalytic Subunit 3	Protein Coding	42	GC17P044070	1.19444	https://www.genecards.org/cgi-bin/carddisp.pl?gene=G6PC3
G6PC2	Glucose-6-Phosphatase Catalytic Subunit 2	Protein Coding	38	GC02P168901	1.19444	https://www.genecards.org/cgi-bin/carddisp.pl?gene=G6PC2
ABL1	ABL Proto-Oncogene 1, Non-Receptor Tyrosine Kinase	Protein Coding	54	GC09P130713	1.17128	https://www.genecards.org/cgi-bin/carddisp.pl?gene=ABL1
MAP2K2	Mitogen-Activated Protein Kinase Kinase 2	Protein Coding	54	GC19M004090	1.17128	https://www.genecards.org/cgi-bin/carddisp.pl?gene=MAP2K2
RET	Ret Proto-Oncogene	Protein Coding	54	GC10P043081	1.17128	https://www.genecards.org/cgi-bin/carddisp.pl?gene=RET
ATR	ATR Serine/Threonine Kinase	Protein Coding	53	GC03M142449	1.17128	https://www.genecards.org/cgi-bin/carddisp.pl?gene=ATR
RPS6KA3	Ribosomal Protein S6 Kinase A3	Protein Coding	53	GC0XM020149	1.17128	https://www.genecards.org/cgi-bin/carddisp.pl?gene=RPS6KA3
MMP14	Matrix Metallopeptidase 14	Protein Coding	52	GC14P025566	1.17128	https://www.genecards.org/cgi-bin/carddisp.pl?gene=MMP14
NF1	Neurofibromin 1	Protein Coding	50	GC17P031094	1.17128	https://www.genecards.org/cgi-bin/carddisp.pl?gene=NF1
PIK3C3	Phosphatidylinositol 3-Kinase Catalytic Subunit Type 3	Protein Coding	50	GC18P041955	1.17128	https://www.genecards.org/cgi-bin/carddisp.pl?gene=PIK3C3
PI4KA	Phosphatidylinositol 4-Kinase Alpha	Protein Coding	49	GC22M020707	1.17128	https://www.genecards.org/cgi-bin/carddisp.pl?gene=PI4KA
FCGR2B	Fc Fragment Of IgG Receptor IIb	Protein Coding	48	GC01P161663	1.17128	https://www.genecards.org/cgi-bin/carddisp.pl?gene=FCGR2B
TNFSF11	TNF Superfamily Member 11	Protein Coding	48	GC13P042562	1.17128	https://www.genecards.org/cgi-bin/carddisp.pl?gene=TNFSF11
ARAF	A-Raf Proto-Oncogene, Serine/Threonine Kinase	Protein Coding	47	GC0XP047562	1.17128	https://www.genecards.org/cgi-bin/carddisp.pl?gene=ARAF
CCR5	C-C Motif Chemokine Receptor 5	Protein Coding	47	GC03P046383	1.17128	https://www.genecards.org/cgi-bin/carddisp.pl?gene=CCR5
IRF1	Interferon Regulatory Factor 1	Protein Coding	47	GC05M132440	1.17128	https://www.genecards.org/cgi-bin/carddisp.pl?gene=IRF1
MAP2K7	Mitogen-Activated Protein Kinase Kinase 7	Protein Coding	47	GC19P007903	1.17128	https://www.genecards.org/cgi-bin/carddisp.pl?gene=MAP2K7
PPP1CB	Protein Phosphatase 1 Catalytic Subunit Beta	Protein Coding	47	GC02P028752	1.17128	https://www.genecards.org/cgi-bin/carddisp.pl?gene=PPP1CB
C1QBP	Complement C1q Binding Protein	Protein Coding	46	GC17M005432	1.17128	https://www.genecards.org/cgi-bin/carddisp.pl?gene=C1QBP
PPP2R2B	Protein Phosphatase 2 Regulatory Subunit Bbeta	Protein Coding	46	GC05M146582	1.17128	https://www.genecards.org/cgi-bin/carddisp.pl?gene=PPP2R2B
PNKP	Polynucleotide Kinase 3'-Phosphatase	Protein Coding	46	GC19M049861	1.17128	https://www.genecards.org/cgi-bin/carddisp.pl?gene=PNKP
TNFSF13B	TNF Superfamily Member 13b	Protein Coding	46	GC13P108251	1.17128	https://www.genecards.org/cgi-bin/carddisp.pl?gene=TNFSF13B
PPP6C	Protein Phosphatase 6 Catalytic Subunit	Protein Coding	45	GC09M125147	1.17128	https://www.genecards.org/cgi-bin/carddisp.pl?gene=PPP6C
PPP1R1B	Protein Phosphatase 1 Regulatory Inhibitor Subunit 1B	Protein Coding	45	GC17P039626	1.17128	https://www.genecards.org/cgi-bin/carddisp.pl?gene=PPP1R1B
PTPRK	Protein Tyrosine Phosphatase Receptor Type K	Protein Coding	45	GC06M127949	1.17128	https://www.genecards.org/cgi-bin/carddisp.pl?gene=PTPRK
PTPRS	Protein Tyrosine Phosphatase Receptor Type S	Protein Coding	45	GC19M005157	1.17128	https://www.genecards.org/cgi-bin/carddisp.pl?gene=PTPRS
UBA2	Ubiquitin Like Modifier Activating Enzyme 2	Protein Coding	45	GC19P034428	1.17128	https://www.genecards.org/cgi-bin/carddisp.pl?gene=UBA2
CCL5	C-C Motif Chemokine Ligand 5	Protein Coding	44	GC17M035871	1.17128	https://www.genecards.org/cgi-bin/carddisp.pl?gene=CCL5
TTBK2	Tau Tubulin Kinase 2	Protein Coding	44	GC15M042738	1.17128	https://www.genecards.org/cgi-bin/carddisp.pl?gene=TTBK2
UBE3B	Ubiquitin Protein Ligase E3B	Protein Coding	44	GC12P109477	1.17128	https://www.genecards.org/cgi-bin/carddisp.pl?gene=UBE3B
UBB	Ubiquitin B	Protein Coding	44	GC17P016380	1.17128	https://www.genecards.org/cgi-bin/carddisp.pl?gene=UBB
CXCL1	C-X-C Motif Chemokine Ligand 1	Protein Coding	43	GC04P073869	1.17128	https://www.genecards.org/cgi-bin/carddisp.pl?gene=CXCL1
MPST	Mercaptopyruvate Sulfurtransferase	Protein Coding	43	GC22P037019	1.17128	https://www.genecards.org/cgi-bin/carddisp.pl?gene=MPST
UBR5	Ubiquitin Protein Ligase E3 Component N-Recognin 5	Protein Coding	43	GC08M102252	1.17128	https://www.genecards.org/cgi-bin/carddisp.pl?gene=UBR5
HNRNPC	Heterogeneous Nuclear Ribonucleoprotein C	Protein Coding	42	GC14M021210	1.17128	https://www.genecards.org/cgi-bin/carddisp.pl?gene=HNRNPC
UBE4B	Ubiquitination Factor E4B	Protein Coding	42	GC01P010032	1.17128	https://www.genecards.org/cgi-bin/carddisp.pl?gene=UBE4B
UBE3C	Ubiquitin Protein Ligase E3C	Protein Coding	42	GC07P157138	1.17128	https://www.genecards.org/cgi-bin/carddisp.pl?gene=UBE3C
CDK3	Cyclin Dependent Kinase 3	Protein Coding	41	GC17P076008	1.17128	https://www.genecards.org/cgi-bin/carddisp.pl?gene=CDK3
DUSP9	Dual Specificity Phosphatase 9	Protein Coding	41	GC0XP153642	1.17128	https://www.genecards.org/cgi-bin/carddisp.pl?gene=DUSP9
SENP3	SUMO Specific Peptidase 3	Protein Coding	41	GC17P008609	1.17128	https://www.genecards.org/cgi-bin/carddisp.pl?gene=SENP3
PTPN23	Protein Tyrosine Phosphatase Non-Receptor Type 23	Protein Coding	41	GC03P047397	1.17128	https://www.genecards.org/cgi-bin/carddisp.pl?gene=PTPN23
IL33	Interleukin 33	Protein Coding	40	GC09P006206	1.17128	https://www.genecards.org/cgi-bin/carddisp.pl?gene=IL33
UHRF2	Ubiquitin Like With PHD And Ring Finger Domains 2	Protein Coding	40	GC09P006405	1.17128	https://www.genecards.org/cgi-bin/carddisp.pl?gene=UHRF2
INPP4B	Inositol Polyphosphate-4-Phosphatase Type II B	Protein Coding	39	GC04M142023	1.17128	https://www.genecards.org/cgi-bin/carddisp.pl?gene=INPP4B
RNF20	Ring Finger Protein 20	Protein Coding	39	GC09P101533	1.17128	https://www.genecards.org/cgi-bin/carddisp.pl?gene=RNF20
UBR4	Ubiquitin Protein Ligase E3 Component N-Recognin 4	Protein Coding	39	GC01M019074	1.17128	https://www.genecards.org/cgi-bin/carddisp.pl?gene=UBR4
MPRIP	Myosin Phosphatase Rho Interacting Protein	Protein Coding	38	GC17P017042	1.17128	https://www.genecards.org/cgi-bin/carddisp.pl?gene=MPRIP
ANKRD28	Ankyrin Repeat Domain 28	Protein Coding	36	GC03M015667	1.17128	https://www.genecards.org/cgi-bin/carddisp.pl?gene=ANKRD28
PPP6R3	Protein Phosphatase 6 Regulatory Subunit 3	Protein Coding	36	GC11P068460	1.17128	https://www.genecards.org/cgi-bin/carddisp.pl?gene=PPP6R3
TBC1D8	TBC1 Domain Family Member 8	Protein Coding	35	GC02M101007	1.17128	https://www.genecards.org/cgi-bin/carddisp.pl?gene=TBC1D8
KNDC1	Kinase Non-Catalytic C-Lobe Domain Containing 1	Protein Coding	35	GC10P133161	1.17128	https://www.genecards.org/cgi-bin/carddisp.pl?gene=KNDC1
STYXL2	Serine/Threonine/Tyrosine Interacting Like 2	Protein Coding	26	GC01P167095	1.17128	https://www.genecards.org/cgi-bin/carddisp.pl?gene=STYXL2
GHET1	Gastric Carcinoma Proliferation Enhancing Transcript 1	RNA Gene	10	GC07P149042	1.17128	https://www.genecards.org/cgi-bin/carddisp.pl?gene=GHET1
RORA	RAR Related Orphan Receptor A	Protein Coding	50	GC15M060488	1.11773	https://www.genecards.org/cgi-bin/carddisp.pl?gene=RORA
NTRK1	Neurotrophic Receptor Tyrosine Kinase 1	Protein Coding	50	GC01P156815	1.11773	https://www.genecards.org/cgi-bin/carddisp.pl?gene=NTRK1
WAS	WASP Actin Nucleation Promoting Factor	Protein Coding	50	GC0XP048676	1.11773	https://www.genecards.org/cgi-bin/carddisp.pl?gene=WAS
ITGB4	Integrin Subunit Beta 4	Protein Coding	49	GC17P075721	1.11773	https://www.genecards.org/cgi-bin/carddisp.pl?gene=ITGB4
ATP1A2	ATPase Na+/K+ Transporting Subunit Alpha 2	Protein Coding	49	GC01P160115	1.11773	https://www.genecards.org/cgi-bin/carddisp.pl?gene=ATP1A2
ODC1	Ornithine Decarboxylase 1	Protein Coding	49	GC02M010432	1.11773	https://www.genecards.org/cgi-bin/carddisp.pl?gene=ODC1
USP8	Ubiquitin Specific Peptidase 8	Protein Coding	49	GC15P050424	1.11773	https://www.genecards.org/cgi-bin/carddisp.pl?gene=USP8
CEBPA	CCAAT Enhancer Binding Protein Alpha	Protein Coding	48	GC19M033299	1.11773	https://www.genecards.org/cgi-bin/carddisp.pl?gene=CEBPA
KCNJ5	Potassium Inwardly Rectifying Channel Subfamily J Member 5	Protein Coding	48	GC11P128891	1.11773	https://www.genecards.org/cgi-bin/carddisp.pl?gene=KCNJ5
NLRP3	NLR Family Pyrin Domain Containing 3	Protein Coding	48	GC01P247415	1.11773	https://www.genecards.org/cgi-bin/carddisp.pl?gene=NLRP3
TXNRD1	Thioredoxin Reductase 1	Protein Coding	48	GC12P104215	1.11773	https://www.genecards.org/cgi-bin/carddisp.pl?gene=TXNRD1
CD46	CD46 Molecule	Protein Coding	47	GC01P207752	1.11773	https://www.genecards.org/cgi-bin/carddisp.pl?gene=CD46
DBI	Diazepam Binding Inhibitor, Acyl-CoA Binding Protein	Protein Coding	47	GC02P119366	1.11773	https://www.genecards.org/cgi-bin/carddisp.pl?gene=DBI
MUSK	Muscle Associated Receptor Tyrosine Kinase	Protein Coding	47	GC09P110668	1.11773	https://www.genecards.org/cgi-bin/carddisp.pl?gene=MUSK
ETFDH	Electron Transfer Flavoprotein Dehydrogenase	Protein Coding	46	GC04P158672	1.11773	https://www.genecards.org/cgi-bin/carddisp.pl?gene=ETFDH
MCM7	Minichromosome Maintenance Complex Component 7	Protein Coding	46	GC07M100092	1.11773	https://www.genecards.org/cgi-bin/carddisp.pl?gene=MCM7
POU2F1	POU Class 2 Homeobox 1	Protein Coding	46	GC01P167190	1.11773	https://www.genecards.org/cgi-bin/carddisp.pl?gene=POU2F1
NCOA2	Nuclear Receptor Coactivator 2	Protein Coding	46	GC08M070109	1.11773	https://www.genecards.org/cgi-bin/carddisp.pl?gene=NCOA2
ATP6V0A4	ATPase H+ Transporting V0 Subunit A4	Protein Coding	45	GC07M138707	1.11773	https://www.genecards.org/cgi-bin/carddisp.pl?gene=ATP6V0A4
ATF3	Activating Transcription Factor 3	Protein Coding	45	GC01P212565	1.11773	https://www.genecards.org/cgi-bin/carddisp.pl?gene=ATF3
HYOU1	Hypoxia Up-Regulated 1	Protein Coding	45	GC11M119045	1.11773	https://www.genecards.org/cgi-bin/carddisp.pl?gene=HYOU1
MKI67	Marker Of Proliferation Ki-67	Protein Coding	45	GC10M128096	1.11773	https://www.genecards.org/cgi-bin/carddisp.pl?gene=MKI67
SETD7	SET Domain Containing 7, Histone Lysine Methyltransferase	Protein Coding	45	GC04M139495	1.11773	https://www.genecards.org/cgi-bin/carddisp.pl?gene=SETD7
S100A4	S100 Calcium Binding Protein A4	Protein Coding	45	GC01M153543	1.11773	https://www.genecards.org/cgi-bin/carddisp.pl?gene=S100A4
RAPGEF3	Rap Guanine Nucleotide Exchange Factor 3	Protein Coding	45	GC12M047736	1.11773	https://www.genecards.org/cgi-bin/carddisp.pl?gene=RAPGEF3
IL3	Interleukin 3	Protein Coding	45	GC05P132060	1.11773	https://www.genecards.org/cgi-bin/carddisp.pl?gene=IL3
USP10	Ubiquitin Specific Peptidase 10	Protein Coding	45	GC16P084734	1.11773	https://www.genecards.org/cgi-bin/carddisp.pl?gene=USP10
USP13	Ubiquitin Specific Peptidase 13	Protein Coding	45	GC03P179652	1.11773	https://www.genecards.org/cgi-bin/carddisp.pl?gene=USP13
CD34	CD34 Molecule	Protein Coding	44	GC01M207880	1.11773	https://www.genecards.org/cgi-bin/carddisp.pl?gene=CD34
CKMT2	Creatine Kinase, Mitochondrial 2	Protein Coding	44	GC05P081232	1.11773	https://www.genecards.org/cgi-bin/carddisp.pl?gene=CKMT2
LEFTY2	Left-Right Determination Factor 2	Protein Coding	44	GC01M225937	1.11773	https://www.genecards.org/cgi-bin/carddisp.pl?gene=LEFTY2
MAP3K4	Mitogen-Activated Protein Kinase Kinase Kinase 4	Protein Coding	44	GC06P160991	1.11773	https://www.genecards.org/cgi-bin/carddisp.pl?gene=MAP3K4
NDUFA5	NADH:Ubiquinone Oxidoreductase Subunit A5	Protein Coding	43	GC07M123536	1.11773	https://www.genecards.org/cgi-bin/carddisp.pl?gene=NDUFA5
TERF2IP	TERF2 Interacting Protein	Protein Coding	43	GC16P075647	1.11773	https://www.genecards.org/cgi-bin/carddisp.pl?gene=TERF2IP
NFAT5	Nuclear Factor Of Activated T Cells 5	Protein Coding	43	GC16P069565	1.11773	https://www.genecards.org/cgi-bin/carddisp.pl?gene=NFAT5
RANGAP1	Ran GTPase Activating Protein 1	Protein Coding	43	GC22M041244	1.11773	https://www.genecards.org/cgi-bin/carddisp.pl?gene=RANGAP1
SLCO2A1	Solute Carrier Organic Anion Transporter Family Member 2A1	Protein Coding	43	GC03M133932	1.11773	https://www.genecards.org/cgi-bin/carddisp.pl?gene=SLCO2A1
USP4	Ubiquitin Specific Peptidase 4	Protein Coding	43	GC03M049277	1.11773	https://www.genecards.org/cgi-bin/carddisp.pl?gene=USP4
UBE2E3	Ubiquitin Conjugating Enzyme E2 E3	Protein Coding	43	GC02P180967	1.11773	https://www.genecards.org/cgi-bin/carddisp.pl?gene=UBE2E3
BHLHE40	Basic Helix-Loop-Helix Family Member E40	Protein Coding	42	GC03P004980	1.11773	https://www.genecards.org/cgi-bin/carddisp.pl?gene=BHLHE40
FLCN	Folliculin	Protein Coding	42	GC17M017206	1.11773	https://www.genecards.org/cgi-bin/carddisp.pl?gene=FLCN
IL15	Interleukin 15	Protein Coding	42	GC04P141636	1.11773	https://www.genecards.org/cgi-bin/carddisp.pl?gene=IL15
GRP	Gastrin Releasing Peptide	Protein Coding	42	GC18P059220	1.11773	https://www.genecards.org/cgi-bin/carddisp.pl?gene=GRP
KMT2D	Lysine Methyltransferase 2D	Protein Coding	42	GC12M049018	1.11773	https://www.genecards.org/cgi-bin/carddisp.pl?gene=KMT2D
CD69	CD69 Molecule	Protein Coding	41	GC12M014378	1.11773	https://www.genecards.org/cgi-bin/carddisp.pl?gene=CD69
ACTN3	Actinin Alpha 3	Protein Coding	41	GC11P066546	1.11773	https://www.genecards.org/cgi-bin/carddisp.pl?gene=ACTN3
EIF5A2	Eukaryotic Translation Initiation Factor 5A2	Protein Coding	41	GC03M170888	1.11773	https://www.genecards.org/cgi-bin/carddisp.pl?gene=EIF5A2
MCAM	Melanoma Cell Adhesion Molecule	Protein Coding	41	GC11M119308	1.11773	https://www.genecards.org/cgi-bin/carddisp.pl?gene=MCAM
PDSS2	Decaprenyl Diphosphate Synthase Subunit 2	Protein Coding	41	GC06M107152	1.11773	https://www.genecards.org/cgi-bin/carddisp.pl?gene=PDSS2
HPR	Haptoglobin-Related Protein	Protein Coding	40	GC16P072097	1.11773	https://www.genecards.org/cgi-bin/carddisp.pl?gene=HPR
CUEDC2	CUE Domain Containing 2	Protein Coding	39	GC10M102424	1.11773	https://www.genecards.org/cgi-bin/carddisp.pl?gene=CUEDC2
EAF2	ELL Associated Factor 2	Protein Coding	39	GC03P121835	1.11773	https://www.genecards.org/cgi-bin/carddisp.pl?gene=EAF2
MUL1	Mitochondrial E3 Ubiquitin Protein Ligase 1	Protein Coding	39	GC01M020499	1.11773	https://www.genecards.org/cgi-bin/carddisp.pl?gene=MUL1
HOXC8	Homeobox C8	Protein Coding	38	GC12P054243	1.11773	https://www.genecards.org/cgi-bin/carddisp.pl?gene=HOXC8
USP39	Ubiquitin Specific Peptidase 39	Protein Coding	38	GC02P085637	1.11773	https://www.genecards.org/cgi-bin/carddisp.pl?gene=USP39
ZNF350	Zinc Finger Protein 350	Protein Coding	36	GC19M051965	1.11773	https://www.genecards.org/cgi-bin/carddisp.pl?gene=ZNF350
TRIM59	Tripartite Motif Containing 59	Protein Coding	36	GC03M160432	1.11773	https://www.genecards.org/cgi-bin/carddisp.pl?gene=TRIM59
SLC2A14	Solute Carrier Family 2 Member 14	Protein Coding	34	GC12M007812	1.11773	https://www.genecards.org/cgi-bin/carddisp.pl?gene=SLC2A14
UBXN7	UBX Domain Protein 7	Protein Coding	33	GC03M196347	1.11773	https://www.genecards.org/cgi-bin/carddisp.pl?gene=UBXN7
CDKN2B-AS1	CDKN2B Antisense RNA 1	RNA Gene	21	GC09P021994	1.11773	https://www.genecards.org/cgi-bin/carddisp.pl?gene=CDKN2B-AS1
MIR200C	MicroRNA 200c	RNA Gene	21	GC12P009004	1.11773	https://www.genecards.org/cgi-bin/carddisp.pl?gene=MIR200C
MIR34B	MicroRNA 34b	RNA Gene	21	GC11P111546	1.11773	https://www.genecards.org/cgi-bin/carddisp.pl?gene=MIR34B
MIR27B	MicroRNA 27b	RNA Gene	20	GC09P095097	1.11773	https://www.genecards.org/cgi-bin/carddisp.pl?gene=MIR27B
MIR449A	MicroRNA 449a	RNA Gene	20	GC05M055171	1.11773	https://www.genecards.org/cgi-bin/carddisp.pl?gene=MIR449A
MT-RNR2	Mitochondrially Encoded 16S RRNA	RNA Gene	19	GCMTP001674	1.11773	https://www.genecards.org/cgi-bin/carddisp.pl?gene=MT-RNR2
FEZF1-AS1	FEZF1 Antisense RNA 1	RNA Gene	15	GC07P122303	1.11773	https://www.genecards.org/cgi-bin/carddisp.pl?gene=FEZF1-AS1
PCAT19	Prostate Cancer Associated Transcript 19	RNA Gene	15	GC19M043675	1.11773	https://www.genecards.org/cgi-bin/carddisp.pl?gene=PCAT19
MIR3662	MicroRNA 3662	RNA Gene	12	GC06M134979	1.11773	https://www.genecards.org/cgi-bin/carddisp.pl?gene=MIR3662
MIR448	MicroRNA 448	RNA Gene	12	GC0XP114823	1.11773	https://www.genecards.org/cgi-bin/carddisp.pl?gene=MIR448
MIR564	MicroRNA 564	RNA Gene	12	GC03P045425	1.11773	https://www.genecards.org/cgi-bin/carddisp.pl?gene=MIR564
UGT1A	UDP Glucuronosyltransferase Family 1 Member A Complex Locus	Uncategorized	10	GC02P233592	1.11773	https://www.genecards.org/cgi-bin/carddisp.pl?gene=UGT1A
MIR6887	MicroRNA 6887	RNA Gene	9	GC19P035122	1.11773	https://www.genecards.org/cgi-bin/carddisp.pl?gene=MIR6887
NDUFS7	NADH:Ubiquinone Oxidoreductase Core Subunit S7	Protein Coding	47	GC19P001527	1.08973	https://www.genecards.org/cgi-bin/carddisp.pl?gene=NDUFS7
NDUFS1	NADH:Ubiquinone Oxidoreductase Core Subunit S1	Protein Coding	47	GC02M206114	1.08973	https://www.genecards.org/cgi-bin/carddisp.pl?gene=NDUFS1
ACAT2	Acetyl-CoA Acetyltransferase 2	Protein Coding	46	GC06P159760	1.08973	https://www.genecards.org/cgi-bin/carddisp.pl?gene=ACAT2
MECP2	Methyl-CpG Binding Protein 2	Protein Coding	46	GC0XM154021	1.08973	https://www.genecards.org/cgi-bin/carddisp.pl?gene=MECP2
NDUFV2	NADH:Ubiquinone Oxidoreductase Core Subunit V2	Protein Coding	46	GC18P009092	1.08973	https://www.genecards.org/cgi-bin/carddisp.pl?gene=NDUFV2
NDUFA6	NADH:Ubiquinone Oxidoreductase Subunit A6	Protein Coding	46	GC22M042085	1.08973	https://www.genecards.org/cgi-bin/carddisp.pl?gene=NDUFA6
NDUFS8	NADH:Ubiquinone Oxidoreductase Core Subunit S8	Protein Coding	46	GC11P068030	1.08973	https://www.genecards.org/cgi-bin/carddisp.pl?gene=NDUFS8
NDUFS6	NADH:Ubiquinone Oxidoreductase Subunit S6	Protein Coding	45	GC05P001801	1.08973	https://www.genecards.org/cgi-bin/carddisp.pl?gene=NDUFS6
NDUFAF4	NADH:Ubiquinone Oxidoreductase Complex Assembly Factor 4	Protein Coding	43	GC06M096889	1.08973	https://www.genecards.org/cgi-bin/carddisp.pl?gene=NDUFAF4
NDUFB3	NADH:Ubiquinone Oxidoreductase Subunit B3	Protein Coding	43	GC02P201071	1.08973	https://www.genecards.org/cgi-bin/carddisp.pl?gene=NDUFB3
PNPLA8	Patatin Like Phospholipase Domain Containing 8	Protein Coding	43	GC07M108470	1.08973	https://www.genecards.org/cgi-bin/carddisp.pl?gene=PNPLA8
NDUFAF2	NADH:Ubiquinone Oxidoreductase Complex Assembly Factor 2	Protein Coding	41	GC05P060945	1.08973	https://www.genecards.org/cgi-bin/carddisp.pl?gene=NDUFAF2
NDUFAF3	NADH:Ubiquinone Oxidoreductase Complex Assembly Factor 3	Protein Coding	41	GC03P049020	1.08973	https://www.genecards.org/cgi-bin/carddisp.pl?gene=NDUFAF3
NDUFB11	NADH:Ubiquinone Oxidoreductase Subunit B11	Protein Coding	41	GC0XM047142	1.08973	https://www.genecards.org/cgi-bin/carddisp.pl?gene=NDUFB11
FOXRED1	FAD Dependent Oxidoreductase Domain Containing 1	Protein Coding	41	GC11P126269	1.08973	https://www.genecards.org/cgi-bin/carddisp.pl?gene=FOXRED1
COX6A2	Cytochrome C Oxidase Subunit 6A2	Protein Coding	40	GC16M031439	1.08973	https://www.genecards.org/cgi-bin/carddisp.pl?gene=COX6A2
TMEM126B	Transmembrane Protein 126B	Protein Coding	39	GC11P085628	1.08973	https://www.genecards.org/cgi-bin/carddisp.pl?gene=TMEM126B
SLC25A26	Solute Carrier Family 25 Member 26	Protein Coding	39	GC03P066120	1.08973	https://www.genecards.org/cgi-bin/carddisp.pl?gene=SLC25A26
NUBPL	Nucleotide Binding Protein Like	Protein Coding	39	GC14P031489	1.08973	https://www.genecards.org/cgi-bin/carddisp.pl?gene=NUBPL
NDUFA11	NADH:Ubiquinone Oxidoreductase Subunit A11	Protein Coding	38	GC19M005891	1.08973	https://www.genecards.org/cgi-bin/carddisp.pl?gene=NDUFA11
NDUFAF5	NADH:Ubiquinone Oxidoreductase Complex Assembly Factor 5	Protein Coding	37	GC20P013787	1.08973	https://www.genecards.org/cgi-bin/carddisp.pl?gene=NDUFAF5
LIPT2	Lipoyl(Octanoyl) Transferase 2	Protein Coding	35	GC11M074491	1.08973	https://www.genecards.org/cgi-bin/carddisp.pl?gene=LIPT2
MT-ND1	Mitochondrially Encoded NADH:Ubiquinone Oxidoreductase Core Subunit 1	Protein Coding	34	GCMTP003309	1.08973	https://www.genecards.org/cgi-bin/carddisp.pl?gene=MT-ND1
TWNK	Twinkle MtDNA Helicase	Protein Coding	34	GC10P100993	1.08973	https://www.genecards.org/cgi-bin/carddisp.pl?gene=TWNK
MT-ND3	Mitochondrially Encoded NADH:Ubiquinone Oxidoreductase Core Subunit 3	Protein Coding	33	GCMTP010061	1.08973	https://www.genecards.org/cgi-bin/carddisp.pl?gene=MT-ND3
NDUFAF8	NADH:Ubiquinone Oxidoreductase Complex Assembly Factor 8	Protein Coding	26	GC17P081241	1.08973	https://www.genecards.org/cgi-bin/carddisp.pl?gene=NDUFAF8
MT-TK	Mitochondrially Encoded TRNA-Lys (AAA/G)	RNA Gene	14	GCMTP008297	1.08973	https://www.genecards.org/cgi-bin/carddisp.pl?gene=MT-TK
MT-TF	Mitochondrially Encoded TRNA-Phe (UUU/C)	RNA Gene	13	GCMTP000580	1.08973	https://www.genecards.org/cgi-bin/carddisp.pl?gene=MT-TF
MT-TI	Mitochondrially Encoded TRNA-Ile (AUU/C)	RNA Gene	13	GCMTP004265	1.08973	https://www.genecards.org/cgi-bin/carddisp.pl?gene=MT-TI
MT-TP	Mitochondrially Encoded TRNA-Pro (CCN)	RNA Gene	10	GCMTM015957	1.08973	https://www.genecards.org/cgi-bin/carddisp.pl?gene=MT-TP
EMG1	EMG1 N1-Specific Pseudouridine Methyltransferase	Protein Coding	41	GC12P006970	1.06653	https://www.genecards.org/cgi-bin/carddisp.pl?gene=EMG1
CDCA3	Cell Division Cycle Associated 3	Protein Coding	38	GC12M006844	1.06653	https://www.genecards.org/cgi-bin/carddisp.pl?gene=CDCA3
NUDT3	Nudix Hydrolase 3	Protein Coding	38	GC06M043459	1.06653	https://www.genecards.org/cgi-bin/carddisp.pl?gene=NUDT3
SETD3	SET Domain Containing 3, Actin Histidine Methyltransferase	Protein Coding	38	GC14M099397	1.06653	https://www.genecards.org/cgi-bin/carddisp.pl?gene=SETD3
LPCAT3	Lysophosphatidylcholine Acyltransferase 3	Protein Coding	36	GC12M006976	1.06653	https://www.genecards.org/cgi-bin/carddisp.pl?gene=LPCAT3
MIR145	MicroRNA 145	RNA Gene	21	GC05P149430	1.06653	https://www.genecards.org/cgi-bin/carddisp.pl?gene=MIR145
CDK6	Cyclin Dependent Kinase 6	Protein Coding	54	GC07M092604	1.03786	https://www.genecards.org/cgi-bin/carddisp.pl?gene=CDK6
DNMT1	DNA Methyltransferase 1	Protein Coding	52	GC19M010133	1.03786	https://www.genecards.org/cgi-bin/carddisp.pl?gene=DNMT1
CDKN2A	Cyclin Dependent Kinase Inhibitor 2A	Protein Coding	52	GC09M021967	1.03786	https://www.genecards.org/cgi-bin/carddisp.pl?gene=CDKN2A
ABCG2	ATP Binding Cassette Subfamily G Member 2 (Junior Blood Group)	Protein Coding	52	GC04M088090	1.03786	https://www.genecards.org/cgi-bin/carddisp.pl?gene=ABCG2
GJA1	Gap Junction Protein Alpha 1	Protein Coding	52	GC06P121436	1.03786	https://www.genecards.org/cgi-bin/carddisp.pl?gene=GJA1
ITGB2	Integrin Subunit Beta 2	Protein Coding	52	GC21M044885	1.03786	https://www.genecards.org/cgi-bin/carddisp.pl?gene=ITGB2
TLR2	Toll Like Receptor 2	Protein Coding	52	GC04P153684	1.03786	https://www.genecards.org/cgi-bin/carddisp.pl?gene=TLR2
FOS	Fos Proto-Oncogene, AP-1 Transcription Factor Subunit	Protein Coding	52	GC14P075278	1.03786	https://www.genecards.org/cgi-bin/carddisp.pl?gene=FOS
ATP1A1	ATPase Na+/K+ Transporting Subunit Alpha 1	Protein Coding	51	GC01P116372	1.03786	https://www.genecards.org/cgi-bin/carddisp.pl?gene=ATP1A1
SPARC	Secreted Protein Acidic And Cysteine Rich	Protein Coding	51	GC05M151661	1.03786	https://www.genecards.org/cgi-bin/carddisp.pl?gene=SPARC
ARG1	Arginase 1	Protein Coding	50	GC06P131473	1.03786	https://www.genecards.org/cgi-bin/carddisp.pl?gene=ARG1
ABCC1	ATP Binding Cassette Subfamily C Member 1	Protein Coding	50	GC16P015949	1.03786	https://www.genecards.org/cgi-bin/carddisp.pl?gene=ABCC1
PRKDC	Protein Kinase, DNA-Activated, Catalytic Subunit	Protein Coding	50	GC08M047773	1.03786	https://www.genecards.org/cgi-bin/carddisp.pl?gene=PRKDC
TNFRSF1A	TNF Receptor Superfamily Member 1A	Protein Coding	50	GC12M006328	1.03786	https://www.genecards.org/cgi-bin/carddisp.pl?gene=TNFRSF1A
CASP9	Caspase 9	Protein Coding	49	GC01M015491	1.03786	https://www.genecards.org/cgi-bin/carddisp.pl?gene=CASP9
GPX1	Glutathione Peroxidase 1	Protein Coding	49	GC03M049377	1.03786	https://www.genecards.org/cgi-bin/carddisp.pl?gene=GPX1
LBR	Lamin B Receptor	Protein Coding	49	GC01M225401	1.03786	https://www.genecards.org/cgi-bin/carddisp.pl?gene=LBR
MAPK9	Mitogen-Activated Protein Kinase 9	Protein Coding	49	GC05M180234	1.03786	https://www.genecards.org/cgi-bin/carddisp.pl?gene=MAPK9
PFN1	Profilin 1	Protein Coding	49	GC17M004945	1.03786	https://www.genecards.org/cgi-bin/carddisp.pl?gene=PFN1
YY1	YY1 Transcription Factor	Protein Coding	49	GC14P100238	1.03786	https://www.genecards.org/cgi-bin/carddisp.pl?gene=YY1
HDAC8	Histone Deacetylase 8	Protein Coding	48	GC0XM072329	1.03786	https://www.genecards.org/cgi-bin/carddisp.pl?gene=HDAC8
RBPJ	Recombination Signal Binding Protein For Immunoglobulin Kappa J Region	Protein Coding	48	GC04P026165	1.03786	https://www.genecards.org/cgi-bin/carddisp.pl?gene=RBPJ
PTK6	Protein Tyrosine Kinase 6	Protein Coding	48	GC20M063528	1.03786	https://www.genecards.org/cgi-bin/carddisp.pl?gene=PTK6
ATP6V1B2	ATPase H+ Transporting V1 Subunit B2	Protein Coding	47	GC08P020197	1.03786	https://www.genecards.org/cgi-bin/carddisp.pl?gene=ATP6V1B2
AXIN1	Axin 1	Protein Coding	47	GC16M000287	1.03786	https://www.genecards.org/cgi-bin/carddisp.pl?gene=AXIN1
DGAT1	Diacylglycerol O-Acyltransferase 1	Protein Coding	47	GC08M144316	1.03786	https://www.genecards.org/cgi-bin/carddisp.pl?gene=DGAT1
DLST	Dihydrolipoamide S-Succinyltransferase	Protein Coding	47	GC14P074881	1.03786	https://www.genecards.org/cgi-bin/carddisp.pl?gene=DLST
ABCC8	ATP Binding Cassette Subfamily C Member 8	Protein Coding	47	GC11M017392	1.03786	https://www.genecards.org/cgi-bin/carddisp.pl?gene=ABCC8
IL7R	Interleukin 7 Receptor	Protein Coding	47	GC05P035852	1.03786	https://www.genecards.org/cgi-bin/carddisp.pl?gene=IL7R
LIFR	LIF Receptor Subunit Alpha	Protein Coding	47	GC05M038475	1.03786	https://www.genecards.org/cgi-bin/carddisp.pl?gene=LIFR
KAT5	Lysine Acetyltransferase 5	Protein Coding	47	GC11P065711	1.03786	https://www.genecards.org/cgi-bin/carddisp.pl?gene=KAT5
GAMT	Guanidinoacetate N-Methyltransferase	Protein Coding	47	GC19M001397	1.03786	https://www.genecards.org/cgi-bin/carddisp.pl?gene=GAMT
PRDX5	Peroxiredoxin 5	Protein Coding	47	GC11P064317	1.03786	https://www.genecards.org/cgi-bin/carddisp.pl?gene=PRDX5
OGG1	8-Oxoguanine DNA Glycosylase	Protein Coding	47	GC03P009751	1.03786	https://www.genecards.org/cgi-bin/carddisp.pl?gene=OGG1
NCAM1	Neural Cell Adhesion Molecule 1	Protein Coding	47	GC11P112961	1.03786	https://www.genecards.org/cgi-bin/carddisp.pl?gene=NCAM1
NR1H3	Nuclear Receptor Subfamily 1 Group H Member 3	Protein Coding	47	GC11P047248	1.03786	https://www.genecards.org/cgi-bin/carddisp.pl?gene=NR1H3
NR1I2	Nuclear Receptor Subfamily 1 Group I Member 2	Protein Coding	47	GC03P119780	1.03786	https://www.genecards.org/cgi-bin/carddisp.pl?gene=NR1I2
SLC25A20	Solute Carrier Family 25 Member 20	Protein Coding	47	GC03M048869	1.03786	https://www.genecards.org/cgi-bin/carddisp.pl?gene=SLC25A20
UBE2N	Ubiquitin Conjugating Enzyme E2 N	Protein Coding	47	GC12M093406	1.03786	https://www.genecards.org/cgi-bin/carddisp.pl?gene=UBE2N
PCSK1	Proprotein Convertase Subtilisin/Kexin Type 1	Protein Coding	47	GC05M096391	1.03786	https://www.genecards.org/cgi-bin/carddisp.pl?gene=PCSK1
EPHB6	EPH Receptor B6	Protein Coding	46	GC07P145227	1.03786	https://www.genecards.org/cgi-bin/carddisp.pl?gene=EPHB6
CFH	Complement Factor H	Protein Coding	46	GC01P196621	1.03786	https://www.genecards.org/cgi-bin/carddisp.pl?gene=CFH
ARG2	Arginase 2	Protein Coding	46	GC14P067619	1.03786	https://www.genecards.org/cgi-bin/carddisp.pl?gene=ARG2
CXCL12	C-X-C Motif Chemokine Ligand 12	Protein Coding	46	GC10M044294	1.03786	https://www.genecards.org/cgi-bin/carddisp.pl?gene=CXCL12
IDH3A	Isocitrate Dehydrogenase (NAD(+)) 3 Catalytic Subunit Alpha	Protein Coding	46	GC15P078131	1.03786	https://www.genecards.org/cgi-bin/carddisp.pl?gene=IDH3A
HSD17B10	Hydroxysteroid 17-Beta Dehydrogenase 10	Protein Coding	46	GC0XM053431	1.03786	https://www.genecards.org/cgi-bin/carddisp.pl?gene=HSD17B10
LOX	Lysyl Oxidase	Protein Coding	46	GC05M122063	1.03786	https://www.genecards.org/cgi-bin/carddisp.pl?gene=LOX
GPC3	Glypican 3	Protein Coding	46	GC0XM133535	1.03786	https://www.genecards.org/cgi-bin/carddisp.pl?gene=GPC3
PON1	Paraoxonase 1	Protein Coding	46	GC07M095297	1.03786	https://www.genecards.org/cgi-bin/carddisp.pl?gene=PON1
NAT1	N-Acetyltransferase 1	Protein Coding	46	GC08P018179	1.03786	https://www.genecards.org/cgi-bin/carddisp.pl?gene=NAT1
NKX2-5	NK2 Homeobox 5	Protein Coding	46	GC05M173232	1.03786	https://www.genecards.org/cgi-bin/carddisp.pl?gene=NKX2-5
SOX10	SRY-Box Transcription Factor 10	Protein Coding	46	GC22M047275	1.03786	https://www.genecards.org/cgi-bin/carddisp.pl?gene=SOX10
RICTOR	RPTOR Independent Companion Of MTOR Complex 2	Protein Coding	46	GC05M038937	1.03786	https://www.genecards.org/cgi-bin/carddisp.pl?gene=RICTOR
SMURF1	SMAD Specific E3 Ubiquitin Protein Ligase 1	Protein Coding	46	GC07M099027	1.03786	https://www.genecards.org/cgi-bin/carddisp.pl?gene=SMURF1
VCAM1	Vascular Cell Adhesion Molecule 1	Protein Coding	46	GC01P100719	1.03786	https://www.genecards.org/cgi-bin/carddisp.pl?gene=VCAM1
EWSR1	EWS RNA Binding Protein 1	Protein Coding	45	GC22P029269	1.03786	https://www.genecards.org/cgi-bin/carddisp.pl?gene=EWSR1
FGF9	Fibroblast Growth Factor 9	Protein Coding	45	GC13P021671	1.03786	https://www.genecards.org/cgi-bin/carddisp.pl?gene=FGF9
BAK1	BCL2 Antagonist/Killer 1	Protein Coding	45	GC06M033572	1.03786	https://www.genecards.org/cgi-bin/carddisp.pl?gene=BAK1
C5AR1	Complement C5a Receptor 1	Protein Coding	45	GC19P047290	1.03786	https://www.genecards.org/cgi-bin/carddisp.pl?gene=C5AR1
CKM	Creatine Kinase, M-Type	Protein Coding	45	GC19M045306	1.03786	https://www.genecards.org/cgi-bin/carddisp.pl?gene=CKM
EIF4A3	Eukaryotic Translation Initiation Factor 4A3	Protein Coding	45	GC17M080135	1.03786	https://www.genecards.org/cgi-bin/carddisp.pl?gene=EIF4A3
ECM1	Extracellular Matrix Protein 1	Protein Coding	45	GC01P150508	1.03786	https://www.genecards.org/cgi-bin/carddisp.pl?gene=ECM1
HTT	Huntingtin	Protein Coding	45	GC04P003041	1.03786	https://www.genecards.org/cgi-bin/carddisp.pl?gene=HTT
GAB1	GRB2 Associated Binding Protein 1	Protein Coding	45	GC04P143336	1.03786	https://www.genecards.org/cgi-bin/carddisp.pl?gene=GAB1
NUP214	Nucleoporin 214	Protein Coding	45	GC09P131125	1.03786	https://www.genecards.org/cgi-bin/carddisp.pl?gene=NUP214
PRL	Prolactin	Protein Coding	45	GC06M022287	1.03786	https://www.genecards.org/cgi-bin/carddisp.pl?gene=PRL
NCOR1	Nuclear Receptor Corepressor 1	Protein Coding	45	GC17M016029	1.03786	https://www.genecards.org/cgi-bin/carddisp.pl?gene=NCOR1
PSMA4	Proteasome 20S Subunit Alpha 4	Protein Coding	45	GC15P078540	1.03786	https://www.genecards.org/cgi-bin/carddisp.pl?gene=PSMA4
TFAP2B	Transcription Factor AP-2 Beta	Protein Coding	45	GC06P051401	1.03786	https://www.genecards.org/cgi-bin/carddisp.pl?gene=TFAP2B
FABP3	Fatty Acid Binding Protein 3	Protein Coding	45	GC01M031365	1.03786	https://www.genecards.org/cgi-bin/carddisp.pl?gene=FABP3
KNG1	Kininogen 1	Protein Coding	45	GC03P186717	1.03786	https://www.genecards.org/cgi-bin/carddisp.pl?gene=KNG1
SIK2	Salt Inducible Kinase 2	Protein Coding	45	GC11P111622	1.03786	https://www.genecards.org/cgi-bin/carddisp.pl?gene=SIK2
VIP	Vasoactive Intestinal Peptide	Protein Coding	45	GC06P152750	1.03786	https://www.genecards.org/cgi-bin/carddisp.pl?gene=VIP
TNKS2	Tankyrase 2	Protein Coding	45	GC10P091798	1.03786	https://www.genecards.org/cgi-bin/carddisp.pl?gene=TNKS2
TNFRSF9	TNF Receptor Superfamily Member 9	Protein Coding	45	GC01M007915	1.03786	https://www.genecards.org/cgi-bin/carddisp.pl?gene=TNFRSF9
SPI1	Spi-1 Proto-Oncogene	Protein Coding	45	GC11M063609	1.03786	https://www.genecards.org/cgi-bin/carddisp.pl?gene=SPI1
ATXN1	Ataxin 1	Protein Coding	44	GC06M016299	1.03786	https://www.genecards.org/cgi-bin/carddisp.pl?gene=ATXN1
ACADL	Acyl-CoA Dehydrogenase Long Chain	Protein Coding	44	GC02M210187	1.03786	https://www.genecards.org/cgi-bin/carddisp.pl?gene=ACADL
GPNMB	Glycoprotein Nmb	Protein Coding	44	GC07P023238	1.03786	https://www.genecards.org/cgi-bin/carddisp.pl?gene=GPNMB
MBTPS1	Membrane Bound Transcription Factor Peptidase, Site 1	Protein Coding	44	GC16M084053	1.03786	https://www.genecards.org/cgi-bin/carddisp.pl?gene=MBTPS1
NDUFA4	NDUFA4 Mitochondrial Complex Associated	Protein Coding	44	GC07M010938	1.03786	https://www.genecards.org/cgi-bin/carddisp.pl?gene=NDUFA4
TAGLN	Transgelin	Protein Coding	44	GC11P117199	1.03786	https://www.genecards.org/cgi-bin/carddisp.pl?gene=TAGLN
UQCRC1	Ubiquinol-Cytochrome C Reductase Core Protein 1	Protein Coding	44	GC03M048598	1.03786	https://www.genecards.org/cgi-bin/carddisp.pl?gene=UQCRC1
CRTC1	CREB Regulated Transcription Coactivator 1	Protein Coding	43	GC19P024473	1.03786	https://www.genecards.org/cgi-bin/carddisp.pl?gene=CRTC1
BNIP3L	BCL2 Interacting Protein 3 Like	Protein Coding	43	GC08P026296	1.03786	https://www.genecards.org/cgi-bin/carddisp.pl?gene=BNIP3L
KDM5A	Lysine Demethylase 5A	Protein Coding	43	GC12M000280	1.03786	https://www.genecards.org/cgi-bin/carddisp.pl?gene=KDM5A
HNRNPD	Heterogeneous Nuclear Ribonucleoprotein D	Protein Coding	43	GC04M082352	1.03786	https://www.genecards.org/cgi-bin/carddisp.pl?gene=HNRNPD
PEX6	Peroxisomal Biogenesis Factor 6	Protein Coding	43	GC06M042963	1.03786	https://www.genecards.org/cgi-bin/carddisp.pl?gene=PEX6
MTO1	Mitochondrial TRNA Translation Optimization 1	Protein Coding	43	GC06P073461	1.03786	https://www.genecards.org/cgi-bin/carddisp.pl?gene=MTO1
SUCLG2	Succinate-CoA Ligase GDP-Forming Subunit Beta	Protein Coding	43	GC03M067358	1.03786	https://www.genecards.org/cgi-bin/carddisp.pl?gene=SUCLG2
SLC25A10	Solute Carrier Family 25 Member 10	Protein Coding	43	GC17P081712	1.03786	https://www.genecards.org/cgi-bin/carddisp.pl?gene=SLC25A10
TUBA1B	Tubulin Alpha 1b	Protein Coding	43	GC12M049127	1.03786	https://www.genecards.org/cgi-bin/carddisp.pl?gene=TUBA1B
GFPT2	Glutamine-Fructose-6-Phosphate Transaminase 2	Protein Coding	43	GC05M180300	1.03786	https://www.genecards.org/cgi-bin/carddisp.pl?gene=GFPT2
SLC38A2	Solute Carrier Family 38 Member 2	Protein Coding	43	GC12M046358	1.03786	https://www.genecards.org/cgi-bin/carddisp.pl?gene=SLC38A2
WWP1	WW Domain Containing E3 Ubiquitin Protein Ligase 1	Protein Coding	43	GC08P086342	1.03786	https://www.genecards.org/cgi-bin/carddisp.pl?gene=WWP1
USP22	Ubiquitin Specific Peptidase 22	Protein Coding	43	GC17M020999	1.03786	https://www.genecards.org/cgi-bin/carddisp.pl?gene=USP22
KDM2A	Lysine Demethylase 2A	Protein Coding	42	GC11P067119	1.03786	https://www.genecards.org/cgi-bin/carddisp.pl?gene=KDM2A
SFXN4	Sideroflexin 4	Protein Coding	42	GC10M119140	1.03786	https://www.genecards.org/cgi-bin/carddisp.pl?gene=SFXN4
RPLP0	Ribosomal Protein Lateral Stalk Subunit P0	Protein Coding	42	GC12M120196	1.03786	https://www.genecards.org/cgi-bin/carddisp.pl?gene=RPLP0
RPL3	Ribosomal Protein L3	Protein Coding	42	GC22M046252	1.03786	https://www.genecards.org/cgi-bin/carddisp.pl?gene=RPL3
TINF2	TERF1 Interacting Nuclear Factor 2	Protein Coding	42	GC14M024234	1.03786	https://www.genecards.org/cgi-bin/carddisp.pl?gene=TINF2
SPEG	Striated Muscle Enriched Protein Kinase	Protein Coding	42	GC02P219434	1.03786	https://www.genecards.org/cgi-bin/carddisp.pl?gene=SPEG
FGF21	Fibroblast Growth Factor 21	Protein Coding	41	GC19P048769	1.03786	https://www.genecards.org/cgi-bin/carddisp.pl?gene=FGF21
DEPTOR	DEP Domain Containing MTOR Interacting Protein	Protein Coding	41	GC08P119873	1.03786	https://www.genecards.org/cgi-bin/carddisp.pl?gene=DEPTOR
JMJD1C	Jumonji Domain Containing 1C	Protein Coding	41	GC10M063167	1.03786	https://www.genecards.org/cgi-bin/carddisp.pl?gene=JMJD1C
MYO1A	Myosin IA	Protein Coding	41	GC12M057028	1.03786	https://www.genecards.org/cgi-bin/carddisp.pl?gene=MYO1A
RUNX1T1	RUNX1 Partner Transcriptional Co-Repressor 1	Protein Coding	41	GC08M091954	1.03786	https://www.genecards.org/cgi-bin/carddisp.pl?gene=RUNX1T1
RBP1	Retinol Binding Protein 1	Protein Coding	41	GC03M139517	1.03786	https://www.genecards.org/cgi-bin/carddisp.pl?gene=RBP1
TEAD2	TEA Domain Transcription Factor 2	Protein Coding	41	GC19M049341	1.03786	https://www.genecards.org/cgi-bin/carddisp.pl?gene=TEAD2
SLC25A29	Solute Carrier Family 25 Member 29	Protein Coding	41	GC14M100280	1.03786	https://www.genecards.org/cgi-bin/carddisp.pl?gene=SLC25A29
WSB1	WD Repeat And SOCS Box Containing 1	Protein Coding	41	GC17P027294	1.03786	https://www.genecards.org/cgi-bin/carddisp.pl?gene=WSB1
UTRN	Utrophin	Protein Coding	41	GC06P144285	1.03786	https://www.genecards.org/cgi-bin/carddisp.pl?gene=UTRN
EIF3D	Eukaryotic Translation Initiation Factor 3 Subunit D	Protein Coding	40	GC22M036510	1.03786	https://www.genecards.org/cgi-bin/carddisp.pl?gene=EIF3D
RCC2	Regulator Of Chromosome Condensation 2	Protein Coding	40	GC01M017406	1.03786	https://www.genecards.org/cgi-bin/carddisp.pl?gene=RCC2
ACBD3	Acyl-CoA Binding Domain Containing 3	Protein Coding	39	GC01M226144	1.03786	https://www.genecards.org/cgi-bin/carddisp.pl?gene=ACBD3
CISD1	CDGSH Iron Sulfur Domain 1	Protein Coding	39	GC10P058269	1.03786	https://www.genecards.org/cgi-bin/carddisp.pl?gene=CISD1
LHPP	Phospholysine Phosphohistidine Inorganic Pyrophosphate Phosphatase	Protein Coding	39	GC10P124461	1.03786	https://www.genecards.org/cgi-bin/carddisp.pl?gene=LHPP
KLF12	Kruppel Like Factor 12	Protein Coding	39	GC13M073686	1.03786	https://www.genecards.org/cgi-bin/carddisp.pl?gene=KLF12
MFF	Mitochondrial Fission Factor	Protein Coding	39	GC02P227325	1.03786	https://www.genecards.org/cgi-bin/carddisp.pl?gene=MFF
IER3	Immediate Early Response 3	Protein Coding	39	GC06M030743	1.03786	https://www.genecards.org/cgi-bin/carddisp.pl?gene=IER3
POLDIP3	DNA Polymerase Delta Interacting Protein 3	Protein Coding	39	GC22M042583	1.03786	https://www.genecards.org/cgi-bin/carddisp.pl?gene=POLDIP3
CCL18	C-C Motif Chemokine Ligand 18	Protein Coding	38	GC17P036064	1.03786	https://www.genecards.org/cgi-bin/carddisp.pl?gene=CCL18
PRPF19	Pre-MRNA Processing Factor 19	Protein Coding	38	GC11M060890	1.03786	https://www.genecards.org/cgi-bin/carddisp.pl?gene=PRPF19
NCOA5	Nuclear Receptor Coactivator 5	Protein Coding	38	GC20M046060	1.03786	https://www.genecards.org/cgi-bin/carddisp.pl?gene=NCOA5
THRSP	Thyroid Hormone Responsive	Protein Coding	38	GC11P078063	1.03786	https://www.genecards.org/cgi-bin/carddisp.pl?gene=THRSP
RNF146	Ring Finger Protein 146	Protein Coding	38	GC06P127266	1.03786	https://www.genecards.org/cgi-bin/carddisp.pl?gene=RNF146
SCAMP3	Secretory Carrier Membrane Protein 3	Protein Coding	38	GC01M155255	1.03786	https://www.genecards.org/cgi-bin/carddisp.pl?gene=SCAMP3
SLC5A12	Solute Carrier Family 5 Member 12	Protein Coding	38	GC11M026648	1.03786	https://www.genecards.org/cgi-bin/carddisp.pl?gene=SLC5A12
U2AF2	U2 Small Nuclear RNA Auxiliary Factor 2	Protein Coding	38	GC19P055654	1.03786	https://www.genecards.org/cgi-bin/carddisp.pl?gene=U2AF2
OTUB2	OTU Deubiquitinase, Ubiquitin Aldehyde Binding 2	Protein Coding	37	GC14P094023	1.03786	https://www.genecards.org/cgi-bin/carddisp.pl?gene=OTUB2
PPRC1	PPARG Related Coactivator 1	Protein Coding	37	GC10P102128	1.03786	https://www.genecards.org/cgi-bin/carddisp.pl?gene=PPRC1
DERL3	Derlin 3	Protein Coding	36	GC22M023834	1.03786	https://www.genecards.org/cgi-bin/carddisp.pl?gene=DERL3
DDX28	DEAD-Box Helicase 28	Protein Coding	36	GC16M068023	1.03786	https://www.genecards.org/cgi-bin/carddisp.pl?gene=DDX28
SERBP1	SERPINE1 MRNA Binding Protein 1	Protein Coding	36	GC01M067407	1.03786	https://www.genecards.org/cgi-bin/carddisp.pl?gene=SERBP1
ZIC5	Zic Family Member 5	Protein Coding	36	GC13M099962	1.03786	https://www.genecards.org/cgi-bin/carddisp.pl?gene=ZIC5
TMEM33	Transmembrane Protein 33	Protein Coding	36	GC04P041937	1.03786	https://www.genecards.org/cgi-bin/carddisp.pl?gene=TMEM33
ACTBL2	Actin Beta Like 2	Protein Coding	35	GC05M057480	1.03786	https://www.genecards.org/cgi-bin/carddisp.pl?gene=ACTBL2
DLK2	Delta Like Non-Canonical Notch Ligand 2	Protein Coding	35	GC06M043450	1.03786	https://www.genecards.org/cgi-bin/carddisp.pl?gene=DLK2
PTCD1	Pentatricopeptide Repeat Domain 1	Protein Coding	35	GC07M099425	1.03786	https://www.genecards.org/cgi-bin/carddisp.pl?gene=PTCD1
DIRAS3	DIRAS Family GTPase 3	Protein Coding	32	GC01M068045	1.03786	https://www.genecards.org/cgi-bin/carddisp.pl?gene=DIRAS3
DRAM1	DNA Damage Regulated Autophagy Modulator 1	Protein Coding	31	GC12P101877	1.03786	https://www.genecards.org/cgi-bin/carddisp.pl?gene=DRAM1
MTREX	Mtr4 Exosome RNA Helicase	Protein Coding	31	GC05P055308	1.03786	https://www.genecards.org/cgi-bin/carddisp.pl?gene=MTREX
ZNF211	Zinc Finger Protein 211	Protein Coding	31	GC19P057630	1.03786	https://www.genecards.org/cgi-bin/carddisp.pl?gene=ZNF211
AK6	Adenylate Kinase 6	Protein Coding	27	GC05M069350	1.03786	https://www.genecards.org/cgi-bin/carddisp.pl?gene=AK6
MIR126	MicroRNA 126	RNA Gene	22	GC09P136670	1.03786	https://www.genecards.org/cgi-bin/carddisp.pl?gene=MIR126
MIR370	MicroRNA 370	RNA Gene	20	GC14P104953	1.03786	https://www.genecards.org/cgi-bin/carddisp.pl?gene=MIR370
MIR22	MicroRNA 22	RNA Gene	20	GC17M001713	1.03786	https://www.genecards.org/cgi-bin/carddisp.pl?gene=MIR22
MIR1-1	MicroRNA 1-1	RNA Gene	19	GC20P062913	1.03786	https://www.genecards.org/cgi-bin/carddisp.pl?gene=MIR1-1
MIR203A	MicroRNA 203a	RNA Gene	19	GC14P105043	1.03786	https://www.genecards.org/cgi-bin/carddisp.pl?gene=MIR203A
MIR28	MicroRNA 28	RNA Gene	19	GC03P188688	1.03786	https://www.genecards.org/cgi-bin/carddisp.pl?gene=MIR28
MIR15B	MicroRNA 15b	RNA Gene	19	GC03P160404	1.03786	https://www.genecards.org/cgi-bin/carddisp.pl?gene=MIR15B
MIR106A	MicroRNA 106a	RNA Gene	18	GC0XM134219	1.03786	https://www.genecards.org/cgi-bin/carddisp.pl?gene=MIR106A
MIR1-2	MicroRNA 1-2	RNA Gene	18	GC18M021828	1.03786	https://www.genecards.org/cgi-bin/carddisp.pl?gene=MIR1-2
MIR455	MicroRNA 455	RNA Gene	18	GC09P114209	1.03786	https://www.genecards.org/cgi-bin/carddisp.pl?gene=MIR455
MIR147B	MicroRNA 147b	RNA Gene	16	GC15P045433	1.03786	https://www.genecards.org/cgi-bin/carddisp.pl?gene=MIR147B
MIR422A	MicroRNA 422a	RNA Gene	16	GC15M063870	1.03786	https://www.genecards.org/cgi-bin/carddisp.pl?gene=MIR422A
MIR505	MicroRNA 505	RNA Gene	16	GC0XM139924	1.03786	https://www.genecards.org/cgi-bin/carddisp.pl?gene=MIR505
MIR363	MicroRNA 363	RNA Gene	15	GC0XM134205	1.03786	https://www.genecards.org/cgi-bin/carddisp.pl?gene=MIR363
MIR20B	MicroRNA 20b	RNA Gene	15	GC0XM134217	1.03786	https://www.genecards.org/cgi-bin/carddisp.pl?gene=MIR20B
MIR592	MicroRNA 592	RNA Gene	15	GC07M127058	1.03786	https://www.genecards.org/cgi-bin/carddisp.pl?gene=MIR592
MIR613	MicroRNA 613	RNA Gene	13	GC12P012766	1.03786	https://www.genecards.org/cgi-bin/carddisp.pl?gene=MIR613
MAFG-DT	MAFG Divergent Transcript	RNA Gene	12	GC17P081928	1.03786	https://www.genecards.org/cgi-bin/carddisp.pl?gene=MAFG-DT
MIR644A	MicroRNA 644a	RNA Gene	11	GC20P034468	1.03786	https://www.genecards.org/cgi-bin/carddisp.pl?gene=MIR644A
MSBP1	Minisatellite Binding Protein 1	Protein Coding	5	GC00U990213	1.03786	https://www.genecards.org/cgi-bin/carddisp.pl?gene=MSBP1
TALDO1P1	Transaldolase 1 Pseudogene 1	Pseudogene	5	GC01P054525	1.03786	https://www.genecards.org/cgi-bin/carddisp.pl?gene=TALDO1P1
LOC107980440	ABL Breakpoint Recombination Region	Biological Region	1	GC09P130710	1.03786	https://www.genecards.org/cgi-bin/carddisp.pl?gene=LOC107980440
LOC107963955	BCR-ABL Major-Breakpoint Cluster Region	Biological Region	1	GC22P025630	1.03786	https://www.genecards.org/cgi-bin/carddisp.pl?gene=LOC107963955
PYGL	Glycogen Phosphorylase L	Protein Coding	49	GC14M050857	1.03393	https://www.genecards.org/cgi-bin/carddisp.pl?gene=PYGL
PARK7	Parkinsonism Associated Deglycase	Protein Coding	47	GC01P007994	1.03393	https://www.genecards.org/cgi-bin/carddisp.pl?gene=PARK7
ALDH2	Aldehyde Dehydrogenase 2 Family Member	Protein Coding	52	GC12P111766	1.01961	https://www.genecards.org/cgi-bin/carddisp.pl?gene=ALDH2
ALDH7A1	Aldehyde Dehydrogenase 7 Family Member A1	Protein Coding	48	GC05M126541	1.01961	https://www.genecards.org/cgi-bin/carddisp.pl?gene=ALDH7A1
ALDH1B1	Aldehyde Dehydrogenase 1 Family Member B1	Protein Coding	46	GC09P038392	1.01961	https://www.genecards.org/cgi-bin/carddisp.pl?gene=ALDH1B1
ALDH3A2	Aldehyde Dehydrogenase 3 Family Member A2	Protein Coding	46	GC17P019648	1.01961	https://www.genecards.org/cgi-bin/carddisp.pl?gene=ALDH3A2
ADH1B	Alcohol Dehydrogenase 1B (Class I), Beta Polypeptide	Protein Coding	45	GC04M099304	1.01961	https://www.genecards.org/cgi-bin/carddisp.pl?gene=ADH1B
ALDH9A1	Aldehyde Dehydrogenase 9 Family Member A1	Protein Coding	42	GC01M165668	1.01961	https://www.genecards.org/cgi-bin/carddisp.pl?gene=ALDH9A1
MACC1-AS1	MACC1 Antisense RNA 1	RNA Gene	15	GC07P020183	0.986673	https://www.genecards.org/cgi-bin/carddisp.pl?gene=MACC1-AS1
MAP3K5	Mitogen-Activated Protein Kinase Kinase Kinase 5	Protein Coding	48	GC06M136557	0.943841	https://www.genecards.org/cgi-bin/carddisp.pl?gene=MAP3K5
LACC1	Laccase Domain Containing 1	Protein Coding	35	GC13P043879	0.943841	https://www.genecards.org/cgi-bin/carddisp.pl?gene=LACC1
LINC00242	Long Intergenic Non-Protein Coding RNA 242	RNA Gene	20	GC06M169788	0.89263	https://www.genecards.org/cgi-bin/carddisp.pl?gene=LINC00242
TYMP	Thymidine Phosphorylase	Protein Coding	47	GC22M050525	0.886831	https://www.genecards.org/cgi-bin/carddisp.pl?gene=TYMP
ADRB2	Adrenoceptor Beta 2	Protein Coding	50	GC05P148825	0.870821	https://www.genecards.org/cgi-bin/carddisp.pl?gene=ADRB2
DNM2	Dynamin 2	Protein Coding	50	GC19P010718	0.870821	https://www.genecards.org/cgi-bin/carddisp.pl?gene=DNM2
CD4	CD4 Molecule	Protein Coding	50	GC12P006786	0.870821	https://www.genecards.org/cgi-bin/carddisp.pl?gene=CD4
PTPN6	Protein Tyrosine Phosphatase Non-Receptor Type 6	Protein Coding	50	GC12P009001	0.870821	https://www.genecards.org/cgi-bin/carddisp.pl?gene=PTPN6
KDM1A	Lysine Demethylase 1A	Protein Coding	47	GC01P023019	0.870821	https://www.genecards.org/cgi-bin/carddisp.pl?gene=KDM1A
SLC7A5	Solute Carrier Family 7 Member 5	Protein Coding	45	GC16M087830	0.870821	https://www.genecards.org/cgi-bin/carddisp.pl?gene=SLC7A5
DHDDS	Dehydrodolichyl Diphosphate Synthase Subunit	Protein Coding	43	GC01P026432	0.870821	https://www.genecards.org/cgi-bin/carddisp.pl?gene=DHDDS
LASP1	LIM And SH3 Protein 1	Protein Coding	43	GC17P038869	0.870821	https://www.genecards.org/cgi-bin/carddisp.pl?gene=LASP1
SNX9	Sorting Nexin 9	Protein Coding	42	GC06P157685	0.870821	https://www.genecards.org/cgi-bin/carddisp.pl?gene=SNX9
DLX2	Distal-Less Homeobox 2	Protein Coding	41	GC02M172099	0.870821	https://www.genecards.org/cgi-bin/carddisp.pl?gene=DLX2
MYOF	Myoferlin	Protein Coding	41	GC10M093306	0.870821	https://www.genecards.org/cgi-bin/carddisp.pl?gene=MYOF
RSAD2	Radical S-Adenosyl Methionine Domain Containing 2	Protein Coding	41	GC02P006865	0.870821	https://www.genecards.org/cgi-bin/carddisp.pl?gene=RSAD2
NUDT4	Nudix Hydrolase 4	Protein Coding	39	GC12P093392	0.870821	https://www.genecards.org/cgi-bin/carddisp.pl?gene=NUDT4
SLC25A33	Solute Carrier Family 25 Member 33	Protein Coding	37	GC01P009539	0.870821	https://www.genecards.org/cgi-bin/carddisp.pl?gene=SLC25A33
C12orf57	Chromosome 12 Open Reading Frame 57	Protein Coding	37	GC12P009003	0.870821	https://www.genecards.org/cgi-bin/carddisp.pl?gene=C12orf57
GPR162	G Protein-Coupled Receptor 162	Protein Coding	36	GC12P006821	0.870821	https://www.genecards.org/cgi-bin/carddisp.pl?gene=GPR162
KDM8	Lysine Demethylase 8	Protein Coding	36	GC16P027214	0.870821	https://www.genecards.org/cgi-bin/carddisp.pl?gene=KDM8
NUDT11	Nudix Hydrolase 11	Protein Coding	36	GC0XM051490	0.870821	https://www.genecards.org/cgi-bin/carddisp.pl?gene=NUDT11
SPSB2	SplA/Ryanodine Receptor Domain And SOCS Box Containing 2	Protein Coding	36	GC12M006851	0.870821	https://www.genecards.org/cgi-bin/carddisp.pl?gene=SPSB2
NUDT10	Nudix Hydrolase 10	Protein Coding	35	GC0XP051332	0.870821	https://www.genecards.org/cgi-bin/carddisp.pl?gene=NUDT10
LRRC23	Leucine Rich Repeat Containing 23	Protein Coding	33	GC12P008990	0.870821	https://www.genecards.org/cgi-bin/carddisp.pl?gene=LRRC23
TRIM63	Tripartite Motif Containing 63	Protein Coding	42	GC01M026062	0.869425	https://www.genecards.org/cgi-bin/carddisp.pl?gene=TRIM63
LDHAL6B	Lactate Dehydrogenase A Like 6B	Protein Coding	41	GC15P059206	0.845002	https://www.genecards.org/cgi-bin/carddisp.pl?gene=LDHAL6B
UCHL1	Ubiquitin C-Terminal Hydrolase L1	Protein Coding	52	GC04P041256	0.844197	https://www.genecards.org/cgi-bin/carddisp.pl?gene=UCHL1
PRKAG2	Protein Kinase AMP-Activated Non-Catalytic Subunit Gamma 2	Protein Coding	51	GC07M151556	0.844197	https://www.genecards.org/cgi-bin/carddisp.pl?gene=PRKAG2
ADIPOQ	Adiponectin, C1Q And Collagen Domain Containing	Protein Coding	46	GC03P186842	0.844197	https://www.genecards.org/cgi-bin/carddisp.pl?gene=ADIPOQ
OXCT1	3-Oxoacid CoA-Transferase 1	Protein Coding	46	GC05M041732	0.825894	https://www.genecards.org/cgi-bin/carddisp.pl?gene=OXCT1
GFPT1	Glutamine--Fructose-6-Phosphate Transaminase 1	Protein Coding	47	GC02M069283	0.815432	https://www.genecards.org/cgi-bin/carddisp.pl?gene=GFPT1
HMOX1	Heme Oxygenase 1	Protein Coding	53	GC22P035380	0.779937	https://www.genecards.org/cgi-bin/carddisp.pl?gene=HMOX1
KRT18	Keratin 18	Protein Coding	49	GC12P052948	0.779937	https://www.genecards.org/cgi-bin/carddisp.pl?gene=KRT18
KRT8	Keratin 8	Protein Coding	48	GC12M052897	0.779937	https://www.genecards.org/cgi-bin/carddisp.pl?gene=KRT8
PRDX2	Peroxiredoxin 2	Protein Coding	47	GC19M012796	0.779937	https://www.genecards.org/cgi-bin/carddisp.pl?gene=PRDX2
TUBB4A	Tubulin Beta 4A Class IVa	Protein Coding	46	GC19M006496	0.779937	https://www.genecards.org/cgi-bin/carddisp.pl?gene=TUBB4A
ACSL1	Acyl-CoA Synthetase Long Chain Family Member 1	Protein Coding	45	GC04M184755	0.779937	https://www.genecards.org/cgi-bin/carddisp.pl?gene=ACSL1
LRPPRC	Leucine Rich Pentatricopeptide Repeat Containing	Protein Coding	43	GC02M043850	0.779937	https://www.genecards.org/cgi-bin/carddisp.pl?gene=LRPPRC
MAP2K1	Mitogen-Activated Protein Kinase Kinase 1	Protein Coding	54	GC15P066386	0.731096	https://www.genecards.org/cgi-bin/carddisp.pl?gene=MAP2K1
CCND1	Cyclin D1	Protein Coding	53	GC11P069641	0.731096	https://www.genecards.org/cgi-bin/carddisp.pl?gene=CCND1
TGFB2	Transforming Growth Factor Beta 2	Protein Coding	50	GC01P218345	0.731096	https://www.genecards.org/cgi-bin/carddisp.pl?gene=TGFB2
GCGR	Glucagon Receptor	Protein Coding	48	GC17P081804	0.731096	https://www.genecards.org/cgi-bin/carddisp.pl?gene=GCGR
TYR	Tyrosinase	Protein Coding	48	GC11P089177	0.731096	https://www.genecards.org/cgi-bin/carddisp.pl?gene=TYR
PRPS1	Phosphoribosyl Pyrophosphate Synthetase 1	Protein Coding	47	GC0XP107628	0.731096	https://www.genecards.org/cgi-bin/carddisp.pl?gene=PRPS1
FOXA2	Forkhead Box A2	Protein Coding	46	GC20M022581	0.731096	https://www.genecards.org/cgi-bin/carddisp.pl?gene=FOXA2
CLN3	CLN3 Lysosomal/Endosomal Transmembrane Protein, Battenin	Protein Coding	45	GC16M028466	0.731096	https://www.genecards.org/cgi-bin/carddisp.pl?gene=CLN3
PRPS2	Phosphoribosyl Pyrophosphate Synthetase 2	Protein Coding	45	GC0XP012791	0.731096	https://www.genecards.org/cgi-bin/carddisp.pl?gene=PRPS2
HCAR1	Hydroxycarboxylic Acid Receptor 1	Protein Coding	38	GC12M122726	0.731096	https://www.genecards.org/cgi-bin/carddisp.pl?gene=HCAR1
PAK1	P21 (RAC1) Activated Kinase 1	Protein Coding	49	GC11M077321	0.709883	https://www.genecards.org/cgi-bin/carddisp.pl?gene=PAK1
BDH1	3-Hydroxybutyrate Dehydrogenase 1	Protein Coding	45	GC03M197519	0.709883	https://www.genecards.org/cgi-bin/carddisp.pl?gene=BDH1
CPEB1	Cytoplasmic Polyadenylation Element Binding Protein 1	Protein Coding	41	GC15M082543	0.709883	https://www.genecards.org/cgi-bin/carddisp.pl?gene=CPEB1
BDH2	3-Hydroxybutyrate Dehydrogenase 2	Protein Coding	38	GC04M103077	0.709883	https://www.genecards.org/cgi-bin/carddisp.pl?gene=BDH2
BDH2P1	3-Hydroxybutyrate Dehydrogenase 2, Pseudogene 1	Pseudogene	6	GC06P099174	0.709883	https://www.genecards.org/cgi-bin/carddisp.pl?gene=BDH2P1
MYB	MYB Proto-Oncogene, Transcription Factor	Protein Coding	52	GC06P135180	0.697683	https://www.genecards.org/cgi-bin/carddisp.pl?gene=MYB
RPN2	Ribophorin II	Protein Coding	43	GC20P037178	0.697683	https://www.genecards.org/cgi-bin/carddisp.pl?gene=RPN2
GUCA2B	Guanylate Cyclase Activator 2B	Protein Coding	40	GC01P042153	0.697683	https://www.genecards.org/cgi-bin/carddisp.pl?gene=GUCA2B
NFKBIA	NFKB Inhibitor Alpha	Protein Coding	52	GC14M035401	0.655846	https://www.genecards.org/cgi-bin/carddisp.pl?gene=NFKBIA
POR	Cytochrome P450 Oxidoreductase	Protein Coding	50	GC07P075899	0.655846	https://www.genecards.org/cgi-bin/carddisp.pl?gene=POR
ASS1	Argininosuccinate Synthase 1	Protein Coding	49	GC09P130444	0.655846	https://www.genecards.org/cgi-bin/carddisp.pl?gene=ASS1
TUBA1A	Tubulin Alpha 1a	Protein Coding	49	GC12M049184	0.655846	https://www.genecards.org/cgi-bin/carddisp.pl?gene=TUBA1A
IGF2	Insulin Like Growth Factor 2	Protein Coding	48	GC11M002130	0.655846	https://www.genecards.org/cgi-bin/carddisp.pl?gene=IGF2
VCL	Vinculin	Protein Coding	48	GC10P073995	0.655846	https://www.genecards.org/cgi-bin/carddisp.pl?gene=VCL
CTPS1	CTP Synthase 1	Protein Coding	46	GC01P040979	0.655846	https://www.genecards.org/cgi-bin/carddisp.pl?gene=CTPS1
COX4I1	Cytochrome C Oxidase Subunit 4I1	Protein Coding	46	GC16P085798	0.655846	https://www.genecards.org/cgi-bin/carddisp.pl?gene=COX4I1
APEX1	Apurinic/Apyrimidinic Endodeoxyribonuclease 1	Protein Coding	46	GC14P020455	0.655846	https://www.genecards.org/cgi-bin/carddisp.pl?gene=APEX1
GANAB	Glucosidase II Alpha Subunit	Protein Coding	46	GC11M063881	0.655846	https://www.genecards.org/cgi-bin/carddisp.pl?gene=GANAB
TUBB2A	Tubulin Beta 2A Class IIa	Protein Coding	46	GC06M003153	0.655846	https://www.genecards.org/cgi-bin/carddisp.pl?gene=TUBB2A
XPC	XPC Complex Subunit, DNA Damage Recognition And Repair Factor	Protein Coding	46	GC03M016116	0.655846	https://www.genecards.org/cgi-bin/carddisp.pl?gene=XPC
IL1A	Interleukin 1 Alpha	Protein Coding	45	GC02M112773	0.655846	https://www.genecards.org/cgi-bin/carddisp.pl?gene=IL1A
TUBB4B	Tubulin Beta 4B Class IVb	Protein Coding	45	GC09P137241	0.655846	https://www.genecards.org/cgi-bin/carddisp.pl?gene=TUBB4B
ARRB1	Arrestin Beta 1	Protein Coding	44	GC11M075261	0.655846	https://www.genecards.org/cgi-bin/carddisp.pl?gene=ARRB1
TRIM24	Tripartite Motif Containing 24	Protein Coding	44	GC07P138460	0.655846	https://www.genecards.org/cgi-bin/carddisp.pl?gene=TRIM24
PSMC1	Proteasome 26S Subunit, ATPase 1	Protein Coding	43	GC14P090256	0.655846	https://www.genecards.org/cgi-bin/carddisp.pl?gene=PSMC1
CCT3	Chaperonin Containing TCP1 Subunit 3	Protein Coding	42	GC01M156308	0.655846	https://www.genecards.org/cgi-bin/carddisp.pl?gene=CCT3
PDIA6	Protein Disulfide Isomerase Family A Member 6	Protein Coding	42	GC02M010784	0.655846	https://www.genecards.org/cgi-bin/carddisp.pl?gene=PDIA6
CCT4	Chaperonin Containing TCP1 Subunit 4	Protein Coding	41	GC02M061868	0.655846	https://www.genecards.org/cgi-bin/carddisp.pl?gene=CCT4
DHX9	DExH-Box Helicase 9	Protein Coding	41	GC01P182839	0.655846	https://www.genecards.org/cgi-bin/carddisp.pl?gene=DHX9
CCT6A	Chaperonin Containing TCP1 Subunit 6A	Protein Coding	40	GC07P056051	0.655846	https://www.genecards.org/cgi-bin/carddisp.pl?gene=CCT6A
IPO7	Importin 7	Protein Coding	39	GC11P009384	0.655846	https://www.genecards.org/cgi-bin/carddisp.pl?gene=IPO7
NAP1L1	Nucleosome Assembly Protein 1 Like 1	Protein Coding	39	GC12M076036	0.655846	https://www.genecards.org/cgi-bin/carddisp.pl?gene=NAP1L1
CKAP4	Cytoskeleton Associated Protein 4	Protein Coding	38	GC12M106237	0.655846	https://www.genecards.org/cgi-bin/carddisp.pl?gene=CKAP4
GARS1	Glycyl-TRNA Synthetase 1	Protein Coding	38	GC07P030580	0.655846	https://www.genecards.org/cgi-bin/carddisp.pl?gene=GARS1
AARS1	Alanyl-TRNA Synthetase 1	Protein Coding	37	GC16M070287	0.655846	https://www.genecards.org/cgi-bin/carddisp.pl?gene=AARS1
DNMT3A	DNA Methyltransferase 3 Alpha	Protein Coding	52	GC02M025228	0.615764	https://www.genecards.org/cgi-bin/carddisp.pl?gene=DNMT3A
CFTR	CF Transmembrane Conductance Regulator	Protein Coding	52	GC07P117287	0.615764	https://www.genecards.org/cgi-bin/carddisp.pl?gene=CFTR
CDC42	Cell Division Cycle 42	Protein Coding	52	GC01P022074	0.615764	https://www.genecards.org/cgi-bin/carddisp.pl?gene=CDC42
RARA	Retinoic Acid Receptor Alpha	Protein Coding	52	GC17P040309	0.615764	https://www.genecards.org/cgi-bin/carddisp.pl?gene=RARA
FTH1	Ferritin Heavy Chain 1	Protein Coding	51	GC11M061959	0.615764	https://www.genecards.org/cgi-bin/carddisp.pl?gene=FTH1
NR3C1	Nuclear Receptor Subfamily 3 Group C Member 1	Protein Coding	51	GC05M143277	0.615764	https://www.genecards.org/cgi-bin/carddisp.pl?gene=NR3C1
PRKD1	Protein Kinase D1	Protein Coding	51	GC14M029576	0.615764	https://www.genecards.org/cgi-bin/carddisp.pl?gene=PRKD1
CTSK	Cathepsin K	Protein Coding	50	GC01M150796	0.615764	https://www.genecards.org/cgi-bin/carddisp.pl?gene=CTSK
DAPK1	Death Associated Protein Kinase 1	Protein Coding	50	GC09P087497	0.615764	https://www.genecards.org/cgi-bin/carddisp.pl?gene=DAPK1
FLI1	Fli-1 Proto-Oncogene, ETS Transcription Factor	Protein Coding	50	GC11P128686	0.615764	https://www.genecards.org/cgi-bin/carddisp.pl?gene=FLI1
LDLR	Low Density Lipoprotein Receptor	Protein Coding	50	GC19P011091	0.615764	https://www.genecards.org/cgi-bin/carddisp.pl?gene=LDLR
P4HB	Prolyl 4-Hydroxylase Subunit Beta	Protein Coding	50	GC17M081843	0.615764	https://www.genecards.org/cgi-bin/carddisp.pl?gene=P4HB
PLA2G7	Phospholipase A2 Group VII	Protein Coding	50	GC06M046704	0.615764	https://www.genecards.org/cgi-bin/carddisp.pl?gene=PLA2G7
FN1	Fibronectin 1	Protein Coding	50	GC02M215360	0.615764	https://www.genecards.org/cgi-bin/carddisp.pl?gene=FN1
SMO	Smoothened, Frizzled Class Receptor	Protein Coding	50	GC07P129638	0.615764	https://www.genecards.org/cgi-bin/carddisp.pl?gene=SMO
AK2	Adenylate Kinase 2	Protein Coding	49	GC01M033007	0.615764	https://www.genecards.org/cgi-bin/carddisp.pl?gene=AK2
GLA	Galactosidase Alpha	Protein Coding	49	GC0XM101393	0.615764	https://www.genecards.org/cgi-bin/carddisp.pl?gene=GLA
GSN	Gelsolin	Protein Coding	49	GC09P121201	0.615764	https://www.genecards.org/cgi-bin/carddisp.pl?gene=GSN
GUSB	Glucuronidase Beta	Protein Coding	49	GC07M065960	0.615764	https://www.genecards.org/cgi-bin/carddisp.pl?gene=GUSB
RPL11	Ribosomal Protein L11	Protein Coding	49	GC01P023691	0.615764	https://www.genecards.org/cgi-bin/carddisp.pl?gene=RPL11
RHEB	Ras Homolog, MTORC1 Binding	Protein Coding	49	GC07M151466	0.615764	https://www.genecards.org/cgi-bin/carddisp.pl?gene=RHEB
RAB7A	RAB7A, Member RAS Oncogene Family	Protein Coding	49	GC03P128771	0.615764	https://www.genecards.org/cgi-bin/carddisp.pl?gene=RAB7A
ADRA1A	Adrenoceptor Alpha 1A	Protein Coding	48	GC08M026747	0.615764	https://www.genecards.org/cgi-bin/carddisp.pl?gene=ADRA1A
CHAT	Choline O-Acetyltransferase	Protein Coding	48	GC10P049609	0.615764	https://www.genecards.org/cgi-bin/carddisp.pl?gene=CHAT
CDH3	Cadherin 3	Protein Coding	48	GC16P068637	0.615764	https://www.genecards.org/cgi-bin/carddisp.pl?gene=CDH3
GLI1	GLI Family Zinc Finger 1	Protein Coding	48	GC12P057460	0.615764	https://www.genecards.org/cgi-bin/carddisp.pl?gene=GLI1
GNAI1	G Protein Subunit Alpha I1	Protein Coding	48	GC07P079769	0.615764	https://www.genecards.org/cgi-bin/carddisp.pl?gene=GNAI1
GNRHR	Gonadotropin Releasing Hormone Receptor	Protein Coding	48	GC04M067737	0.615764	https://www.genecards.org/cgi-bin/carddisp.pl?gene=GNRHR
CLDN1	Claudin 1	Protein Coding	48	GC03M190305	0.615764	https://www.genecards.org/cgi-bin/carddisp.pl?gene=CLDN1
CYBA	Cytochrome B-245 Alpha Chain	Protein Coding	48	GC16M088643	0.615764	https://www.genecards.org/cgi-bin/carddisp.pl?gene=CYBA
HLA-A	Major Histocompatibility Complex, Class I, A	Protein Coding	48	GC06P049311	0.615764	https://www.genecards.org/cgi-bin/carddisp.pl?gene=HLA-A
GATA6	GATA Binding Protein 6	Protein Coding	48	GC18P022169	0.615764	https://www.genecards.org/cgi-bin/carddisp.pl?gene=GATA6
RHOA	Ras Homolog Family Member A	Protein Coding	48	GC03M049359	0.615764	https://www.genecards.org/cgi-bin/carddisp.pl?gene=RHOA
ADRA2A	Adrenoceptor Alpha 2A	Protein Coding	47	GC10P111077	0.615764	https://www.genecards.org/cgi-bin/carddisp.pl?gene=ADRA2A
ATF1	Activating Transcription Factor 1	Protein Coding	47	GC12P050763	0.615764	https://www.genecards.org/cgi-bin/carddisp.pl?gene=ATF1
CRP	C-Reactive Protein	Protein Coding	47	GC01M159717	0.615764	https://www.genecards.org/cgi-bin/carddisp.pl?gene=CRP
CTSH	Cathepsin H	Protein Coding	47	GC15M078925	0.615764	https://www.genecards.org/cgi-bin/carddisp.pl?gene=CTSH
APAF1	Apoptotic Peptidase Activating Factor 1	Protein Coding	47	GC12P098645	0.615764	https://www.genecards.org/cgi-bin/carddisp.pl?gene=APAF1
ASAH1	N-Acylsphingosine Amidohydrolase 1	Protein Coding	47	GC08M018055	0.615764	https://www.genecards.org/cgi-bin/carddisp.pl?gene=ASAH1
GSS	Glutathione Synthetase	Protein Coding	47	GC20M034928	0.615764	https://www.genecards.org/cgi-bin/carddisp.pl?gene=GSS
CLTC	Clathrin Heavy Chain	Protein Coding	47	GC17P059619	0.615764	https://www.genecards.org/cgi-bin/carddisp.pl?gene=CLTC
HSPG2	Heparan Sulfate Proteoglycan 2	Protein Coding	47	GC01M021822	0.615764	https://www.genecards.org/cgi-bin/carddisp.pl?gene=HSPG2
ITGAM	Integrin Subunit Alpha M	Protein Coding	47	GC16P031686	0.615764	https://www.genecards.org/cgi-bin/carddisp.pl?gene=ITGAM
HSD17B4	Hydroxysteroid 17-Beta Dehydrogenase 4	Protein Coding	47	GC05P119452	0.615764	https://www.genecards.org/cgi-bin/carddisp.pl?gene=HSD17B4
SMAD9	SMAD Family Member 9	Protein Coding	47	GC13M036844	0.615764	https://www.genecards.org/cgi-bin/carddisp.pl?gene=SMAD9
ETFA	Electron Transfer Flavoprotein Subunit Alpha	Protein Coding	46	GC15M076215	0.615764	https://www.genecards.org/cgi-bin/carddisp.pl?gene=ETFA
ETFB	Electron Transfer Flavoprotein Subunit Beta	Protein Coding	46	GC19M051345	0.615764	https://www.genecards.org/cgi-bin/carddisp.pl?gene=ETFB
ALDH1A3	Aldehyde Dehydrogenase 1 Family Member A3	Protein Coding	46	GC15P100877	0.615764	https://www.genecards.org/cgi-bin/carddisp.pl?gene=ALDH1A3
ACSL4	Acyl-CoA Synthetase Long Chain Family Member 4	Protein Coding	46	GC0XM109624	0.615764	https://www.genecards.org/cgi-bin/carddisp.pl?gene=ACSL4
CTSA	Cathepsin A	Protein Coding	46	GC20P045890	0.615764	https://www.genecards.org/cgi-bin/carddisp.pl?gene=CTSA
DFFA	DNA Fragmentation Factor Subunit Alpha	Protein Coding	46	GC01M010456	0.615764	https://www.genecards.org/cgi-bin/carddisp.pl?gene=DFFA
FTO	FTO Alpha-Ketoglutarate Dependent Dioxygenase	Protein Coding	46	GC16P053737	0.615764	https://www.genecards.org/cgi-bin/carddisp.pl?gene=FTO
MYH11	Myosin Heavy Chain 11	Protein Coding	46	GC16M015704	0.615764	https://www.genecards.org/cgi-bin/carddisp.pl?gene=MYH11
ROBO1	Roundabout Guidance Receptor 1	Protein Coding	46	GC03M078597	0.615764	https://www.genecards.org/cgi-bin/carddisp.pl?gene=ROBO1
SCARB1	Scavenger Receptor Class B Member 1	Protein Coding	46	GC12M124776	0.615764	https://www.genecards.org/cgi-bin/carddisp.pl?gene=SCARB1
RALA	RAS Like Proto-Oncogene A	Protein Coding	46	GC07P039622	0.615764	https://www.genecards.org/cgi-bin/carddisp.pl?gene=RALA
RDH11	Retinol Dehydrogenase 11	Protein Coding	46	GC14M067676	0.615764	https://www.genecards.org/cgi-bin/carddisp.pl?gene=RDH11
TIMP1	TIMP Metallopeptidase Inhibitor 1	Protein Coding	46	GC0XP047583	0.615764	https://www.genecards.org/cgi-bin/carddisp.pl?gene=TIMP1
SUCLG1	Succinate-CoA Ligase GDP/ADP-Forming Subunit Alpha	Protein Coding	46	GC02M084423	0.615764	https://www.genecards.org/cgi-bin/carddisp.pl?gene=SUCLG1
RASSF1	Ras Association Domain Family Member 1	Protein Coding	46	GC03M050329	0.615764	https://www.genecards.org/cgi-bin/carddisp.pl?gene=RASSF1
SLIT2	Slit Guidance Ligand 2	Protein Coding	46	GC04P020287	0.615764	https://www.genecards.org/cgi-bin/carddisp.pl?gene=SLIT2
CTSZ	Cathepsin Z	Protein Coding	45	GC20M058995	0.615764	https://www.genecards.org/cgi-bin/carddisp.pl?gene=CTSZ
DYSF	Dysferlin	Protein Coding	45	GC02P071453	0.615764	https://www.genecards.org/cgi-bin/carddisp.pl?gene=DYSF
ITGAX	Integrin Subunit Alpha X	Protein Coding	45	GC16P031703	0.615764	https://www.genecards.org/cgi-bin/carddisp.pl?gene=ITGAX
CLOCK	Clock Circadian Regulator	Protein Coding	45	GC04M055427	0.615764	https://www.genecards.org/cgi-bin/carddisp.pl?gene=CLOCK
HSPA2	Heat Shock Protein Family A (Hsp70) Member 2	Protein Coding	45	GC14P064535	0.615764	https://www.genecards.org/cgi-bin/carddisp.pl?gene=HSPA2
MGAT2	Alpha-1,6-Mannosyl-Glycoprotein 2-Beta-N-Acetylglucosaminyltransferase	Protein Coding	45	GC14P049620	0.615764	https://www.genecards.org/cgi-bin/carddisp.pl?gene=MGAT2
GNS	Glucosamine (N-Acetyl)-6-Sulfatase	Protein Coding	45	GC12M064713	0.615764	https://www.genecards.org/cgi-bin/carddisp.pl?gene=GNS
SERPINB2	Serpin Family B Member 2	Protein Coding	45	GC18P063871	0.615764	https://www.genecards.org/cgi-bin/carddisp.pl?gene=SERPINB2
SCARB2	Scavenger Receptor Class B Member 2	Protein Coding	45	GC04M076158	0.615764	https://www.genecards.org/cgi-bin/carddisp.pl?gene=SCARB2
RBP4	Retinol Binding Protein 4	Protein Coding	45	GC10M093591	0.615764	https://www.genecards.org/cgi-bin/carddisp.pl?gene=RBP4
REST	RE1 Silencing Transcription Factor	Protein Coding	45	GC04P056907	0.615764	https://www.genecards.org/cgi-bin/carddisp.pl?gene=REST
PBRM1	Polybromo 1	Protein Coding	45	GC03M052545	0.615764	https://www.genecards.org/cgi-bin/carddisp.pl?gene=PBRM1
LMNB2	Lamin B2	Protein Coding	45	GC19M002444	0.615764	https://www.genecards.org/cgi-bin/carddisp.pl?gene=LMNB2
TCN2	Transcobalamin 2	Protein Coding	45	GC22P030606	0.615764	https://www.genecards.org/cgi-bin/carddisp.pl?gene=TCN2
EEA1	Early Endosome Antigen 1	Protein Coding	45	GC12M092770	0.615764	https://www.genecards.org/cgi-bin/carddisp.pl?gene=EEA1
APOA5	Apolipoprotein A5	Protein Coding	45	GC11M116789	0.615764	https://www.genecards.org/cgi-bin/carddisp.pl?gene=APOA5
SNAI2	Snail Family Transcriptional Repressor 2	Protein Coding	45	GC08M048917	0.615764	https://www.genecards.org/cgi-bin/carddisp.pl?gene=SNAI2
WNT2	Wnt Family Member 2	Protein Coding	45	GC07M117276	0.615764	https://www.genecards.org/cgi-bin/carddisp.pl?gene=WNT2
SPHK2	Sphingosine Kinase 2	Protein Coding	45	GC19P048619	0.615764	https://www.genecards.org/cgi-bin/carddisp.pl?gene=SPHK2
FCER1G	Fc Fragment Of IgE Receptor Ig	Protein Coding	44	GC01P161215	0.615764	https://www.genecards.org/cgi-bin/carddisp.pl?gene=FCER1G
CHI3L1	Chitinase 3 Like 1	Protein Coding	44	GC01M203148	0.615764	https://www.genecards.org/cgi-bin/carddisp.pl?gene=CHI3L1
RAB2A	RAB2A, Member RAS Oncogene Family	Protein Coding	44	GC08P060516	0.615764	https://www.genecards.org/cgi-bin/carddisp.pl?gene=RAB2A
P2RX4	Purinergic Receptor P2X 4	Protein Coding	44	GC12P123034	0.615764	https://www.genecards.org/cgi-bin/carddisp.pl?gene=P2RX4
NUDT1	Nudix Hydrolase 1	Protein Coding	44	GC07P002242	0.615764	https://www.genecards.org/cgi-bin/carddisp.pl?gene=NUDT1
CREM	CAMP Responsive Element Modulator	Protein Coding	43	GC10P035126	0.615764	https://www.genecards.org/cgi-bin/carddisp.pl?gene=CREM
CUL2	Cullin 2	Protein Coding	43	GC10M035046	0.615764	https://www.genecards.org/cgi-bin/carddisp.pl?gene=CUL2
CD63	CD63 Molecule	Protein Coding	43	GC12M055725	0.615764	https://www.genecards.org/cgi-bin/carddisp.pl?gene=CD63
ACSF3	Acyl-CoA Synthetase Family Member 3	Protein Coding	43	GC16P089088	0.615764	https://www.genecards.org/cgi-bin/carddisp.pl?gene=ACSF3
COQ7	Coenzyme Q7, Hydroxylase	Protein Coding	43	GC16P019067	0.615764	https://www.genecards.org/cgi-bin/carddisp.pl?gene=COQ7
LETM1	Leucine Zipper And EF-Hand Containing Transmembrane Protein 1	Protein Coding	43	GC04M001811	0.615764	https://www.genecards.org/cgi-bin/carddisp.pl?gene=LETM1
MGST3	Microsomal Glutathione S-Transferase 3	Protein Coding	43	GC01P165632	0.615764	https://www.genecards.org/cgi-bin/carddisp.pl?gene=MGST3
KHSRP	KH-Type Splicing Regulatory Protein	Protein Coding	43	GC19M006413	0.615764	https://www.genecards.org/cgi-bin/carddisp.pl?gene=KHSRP
GLUD2	Glutamate Dehydrogenase 2	Protein Coding	43	GC0XP121047	0.615764	https://www.genecards.org/cgi-bin/carddisp.pl?gene=GLUD2
RPL13	Ribosomal Protein L13	Protein Coding	43	GC16P089674	0.615764	https://www.genecards.org/cgi-bin/carddisp.pl?gene=RPL13
MTA1	Metastasis Associated 1	Protein Coding	43	GC14P105419	0.615764	https://www.genecards.org/cgi-bin/carddisp.pl?gene=MTA1
ULK2	Unc-51 Like Autophagy Activating Kinase 2	Protein Coding	43	GC17M020302	0.615764	https://www.genecards.org/cgi-bin/carddisp.pl?gene=ULK2
TRPV2	Transient Receptor Potential Cation Channel Subfamily V Member 2	Protein Coding	43	GC17P016415	0.615764	https://www.genecards.org/cgi-bin/carddisp.pl?gene=TRPV2
SP3	Sp3 Transcription Factor	Protein Coding	43	GC02M173882	0.615764	https://www.genecards.org/cgi-bin/carddisp.pl?gene=SP3
SSB	Small RNA Binding Exonuclease Protection Factor La	Protein Coding	43	GC02P169791	0.615764	https://www.genecards.org/cgi-bin/carddisp.pl?gene=SSB
FCAR	Fc Fragment Of IgA Receptor	Protein Coding	42	GC19P055640	0.615764	https://www.genecards.org/cgi-bin/carddisp.pl?gene=FCAR
CD37	CD37 Molecule	Protein Coding	42	GC19P049335	0.615764	https://www.genecards.org/cgi-bin/carddisp.pl?gene=CD37
ADD2	Adducin 2	Protein Coding	42	GC02M070626	0.615764	https://www.genecards.org/cgi-bin/carddisp.pl?gene=ADD2
CAPZA1	Capping Actin Protein Of Muscle Z-Line Subunit Alpha 1	Protein Coding	42	GC01P112619	0.615764	https://www.genecards.org/cgi-bin/carddisp.pl?gene=CAPZA1
GSTK1	Glutathione S-Transferase Kappa 1	Protein Coding	42	GC07P145230	0.615764	https://www.genecards.org/cgi-bin/carddisp.pl?gene=GSTK1
CLIC1	Chloride Intracellular Channel 1	Protein Coding	42	GC06M033042	0.615764	https://www.genecards.org/cgi-bin/carddisp.pl?gene=CLIC1
PECAM1	Platelet And Endothelial Cell Adhesion Molecule 1	Protein Coding	42	GC17M064319	0.615764	https://www.genecards.org/cgi-bin/carddisp.pl?gene=PECAM1
RPL23A	Ribosomal Protein L23a	Protein Coding	42	GC17P028719	0.615764	https://www.genecards.org/cgi-bin/carddisp.pl?gene=RPL23A
RBP3	Retinol Binding Protein 3	Protein Coding	42	GC10P047348	0.615764	https://www.genecards.org/cgi-bin/carddisp.pl?gene=RBP3
TBX15	T-Box Transcription Factor 15	Protein Coding	42	GC01M118883	0.615764	https://www.genecards.org/cgi-bin/carddisp.pl?gene=TBX15
TCF7L1	Transcription Factor 7 Like 1	Protein Coding	42	GC02P085133	0.615764	https://www.genecards.org/cgi-bin/carddisp.pl?gene=TCF7L1
UBA52	Ubiquitin A-52 Residue Ribosomal Protein Fusion Product 1	Protein Coding	42	GC19P018563	0.615764	https://www.genecards.org/cgi-bin/carddisp.pl?gene=UBA52
TAGLN2	Transgelin 2	Protein Coding	42	GC01M159918	0.615764	https://www.genecards.org/cgi-bin/carddisp.pl?gene=TAGLN2
SMARCD3	SWI/SNF Related, Matrix Associated, Actin Dependent Regulator Of Chromatin, Subfamily D, Member 3	Protein Coding	42	GC07M151238	0.615764	https://www.genecards.org/cgi-bin/carddisp.pl?gene=SMARCD3
SH3GLB1	SH3 Domain Containing GRB2 Like, Endophilin B1	Protein Coding	42	GC01P086704	0.615764	https://www.genecards.org/cgi-bin/carddisp.pl?gene=SH3GLB1
CAPG	Capping Actin Protein, Gelsolin Like	Protein Coding	41	GC02M085394	0.615764	https://www.genecards.org/cgi-bin/carddisp.pl?gene=CAPG
GRHL2	Grainyhead Like Transcription Factor 2	Protein Coding	41	GC08P101492	0.615764	https://www.genecards.org/cgi-bin/carddisp.pl?gene=GRHL2
MGAT5	Alpha-1,6-Mannosylglycoprotein 6-Beta-N-Acetylglucosaminyltransferase	Protein Coding	41	GC02P134119	0.615764	https://www.genecards.org/cgi-bin/carddisp.pl?gene=MGAT5
HDGF	Heparin Binding Growth Factor	Protein Coding	41	GC01M156759	0.615764	https://www.genecards.org/cgi-bin/carddisp.pl?gene=HDGF
C4BPA	Complement Component 4 Binding Protein Alpha	Protein Coding	41	GC01P207105	0.615764	https://www.genecards.org/cgi-bin/carddisp.pl?gene=C4BPA
MYH4	Myosin Heavy Chain 4	Protein Coding	41	GC17M010443	0.615764	https://www.genecards.org/cgi-bin/carddisp.pl?gene=MYH4
RHOD	Ras Homolog Family Member D	Protein Coding	41	GC11P067057	0.615764	https://www.genecards.org/cgi-bin/carddisp.pl?gene=RHOD
PGRMC2	Progesterone Receptor Membrane Component 2	Protein Coding	40	GC04M128269	0.615764	https://www.genecards.org/cgi-bin/carddisp.pl?gene=PGRMC2
CEBPD	CCAAT Enhancer Binding Protein Delta	Protein Coding	39	GC08M047759	0.615764	https://www.genecards.org/cgi-bin/carddisp.pl?gene=CEBPD
ECI1	Enoyl-CoA Delta Isomerase 1	Protein Coding	39	GC16M002239	0.615764	https://www.genecards.org/cgi-bin/carddisp.pl?gene=ECI1
ILF3	Interleukin Enhancer Binding Factor 3	Protein Coding	39	GC19P010625	0.615764	https://www.genecards.org/cgi-bin/carddisp.pl?gene=ILF3
RPL29	Ribosomal Protein L29	Protein Coding	39	GC03M052007	0.615764	https://www.genecards.org/cgi-bin/carddisp.pl?gene=RPL29
FOXN3	Forkhead Box N3	Protein Coding	39	GC14M094570	0.615764	https://www.genecards.org/cgi-bin/carddisp.pl?gene=FOXN3
USO1	USO1 Vesicle Transport Factor	Protein Coding	39	GC04P075724	0.615764	https://www.genecards.org/cgi-bin/carddisp.pl?gene=USO1
USP37	Ubiquitin Specific Peptidase 37	Protein Coding	39	GC02M218450	0.615764	https://www.genecards.org/cgi-bin/carddisp.pl?gene=USP37
DCUN1D1	Defective In Cullin Neddylation 1 Domain Containing 1	Protein Coding	38	GC03M182938	0.615764	https://www.genecards.org/cgi-bin/carddisp.pl?gene=DCUN1D1
DMTN	Dematin Actin Binding Protein	Protein Coding	38	GC08P022048	0.615764	https://www.genecards.org/cgi-bin/carddisp.pl?gene=DMTN
DPY30	Dpy-30 Histone Methyltransferase Complex Regulatory Subunit	Protein Coding	38	GC02M031867	0.615764	https://www.genecards.org/cgi-bin/carddisp.pl?gene=DPY30
GYPB	Glycophorin B (MNS Blood Group)	Protein Coding	38	GC04M143996	0.615764	https://www.genecards.org/cgi-bin/carddisp.pl?gene=GYPB
CKMT1A	Creatine Kinase, Mitochondrial 1A	Protein Coding	38	GC15P043693	0.615764	https://www.genecards.org/cgi-bin/carddisp.pl?gene=CKMT1A
MYO1G	Myosin IG	Protein Coding	38	GC07M044962	0.615764	https://www.genecards.org/cgi-bin/carddisp.pl?gene=MYO1G
SH3PXD2A	SH3 And PX Domains 2A	Protein Coding	38	GC10M103594	0.615764	https://www.genecards.org/cgi-bin/carddisp.pl?gene=SH3PXD2A
VAT1	Vesicle Amine Transport 1	Protein Coding	38	GC17M043014	0.615764	https://www.genecards.org/cgi-bin/carddisp.pl?gene=VAT1
POMGNT2	Protein O-Linked Mannose N-Acetylglucosaminyltransferase 2 (Beta 1,4-)	Protein Coding	37	GC03M043121	0.615764	https://www.genecards.org/cgi-bin/carddisp.pl?gene=POMGNT2
ANGPTL2	Angiopoietin Like 2	Protein Coding	36	GC09M127087	0.615764	https://www.genecards.org/cgi-bin/carddisp.pl?gene=ANGPTL2
P4HTM	Prolyl 4-Hydroxylase, Transmembrane	Protein Coding	36	GC03P049202	0.615764	https://www.genecards.org/cgi-bin/carddisp.pl?gene=P4HTM
TRAF3IP3	TRAF3 Interacting Protein 3	Protein Coding	36	GC01P209756	0.615764	https://www.genecards.org/cgi-bin/carddisp.pl?gene=TRAF3IP3
TOMM22	Translocase Of Outer Mitochondrial Membrane 22	Protein Coding	36	GC22P038681	0.615764	https://www.genecards.org/cgi-bin/carddisp.pl?gene=TOMM22
CASP8AP2	Caspase 8 Associated Protein 2	Protein Coding	35	GC06P089829	0.615764	https://www.genecards.org/cgi-bin/carddisp.pl?gene=CASP8AP2
ISOC2	Isochorismatase Domain Containing 2	Protein Coding	35	GC19M055452	0.615764	https://www.genecards.org/cgi-bin/carddisp.pl?gene=ISOC2
ATP5F1D	ATP Synthase F1 Subunit Delta	Protein Coding	35	GC19P001242	0.615764	https://www.genecards.org/cgi-bin/carddisp.pl?gene=ATP5F1D
PDF	Peptide Deformylase, Mitochondrial	Protein Coding	35	GC16M069590	0.615764	https://www.genecards.org/cgi-bin/carddisp.pl?gene=PDF
METTL15	Methyltransferase Like 15	Protein Coding	34	GC11P028109	0.615764	https://www.genecards.org/cgi-bin/carddisp.pl?gene=METTL15
OSCP1	Organic Solute Carrier Partner 1	Protein Coding	34	GC01M036415	0.615764	https://www.genecards.org/cgi-bin/carddisp.pl?gene=OSCP1
OSTN	Osteocrin	Protein Coding	34	GC03P191199	0.615764	https://www.genecards.org/cgi-bin/carddisp.pl?gene=OSTN
TMPRSS11B	Transmembrane Serine Protease 11B	Protein Coding	34	GC04M068226	0.615764	https://www.genecards.org/cgi-bin/carddisp.pl?gene=TMPRSS11B
SLC35G2	Solute Carrier Family 35 Member G2	Protein Coding	31	GC03P136818	0.615764	https://www.genecards.org/cgi-bin/carddisp.pl?gene=SLC35G2
SMTNL1	Smoothelin Like 1	Protein Coding	31	GC11P057537	0.615764	https://www.genecards.org/cgi-bin/carddisp.pl?gene=SMTNL1
SQOR	Sulfide Quinone Oxidoreductase	Protein Coding	30	GC15P045632	0.615764	https://www.genecards.org/cgi-bin/carddisp.pl?gene=SQOR
ATP5PB	ATP Synthase Peripheral Stalk-Membrane Subunit B	Protein Coding	30	GC01P111449	0.615764	https://www.genecards.org/cgi-bin/carddisp.pl?gene=ATP5PB
MIR17HG	MiR-17-92a-1 Cluster Host Gene	RNA Gene	27	GC13P091347	0.615764	https://www.genecards.org/cgi-bin/carddisp.pl?gene=MIR17HG
ZUP1	Zinc Finger Containing Ubiquitin Peptidase 1	Protein Coding	27	GC06M116636	0.615764	https://www.genecards.org/cgi-bin/carddisp.pl?gene=ZUP1
MIR29B1	MicroRNA 29b-1	RNA Gene	20	GC07M130877	0.615764	https://www.genecards.org/cgi-bin/carddisp.pl?gene=MIR29B1
MIR369	MicroRNA 369	RNA Gene	19	GC14P105290	0.615764	https://www.genecards.org/cgi-bin/carddisp.pl?gene=MIR369
MIR342	MicroRNA 342	RNA Gene	19	GC14P100109	0.615764	https://www.genecards.org/cgi-bin/carddisp.pl?gene=MIR342
MUC3B	Mucin 3B, Cell Surface Associated	Protein Coding	19	GC07U903146	0.615764	https://www.genecards.org/cgi-bin/carddisp.pl?gene=MUC3B
SCARNA12	Small Cajal Body-Specific RNA 12	RNA Gene	19	GC12M006969	0.615764	https://www.genecards.org/cgi-bin/carddisp.pl?gene=SCARNA12
MIR495	MicroRNA 495	RNA Gene	15	GC14P105315	0.615764	https://www.genecards.org/cgi-bin/carddisp.pl?gene=MIR495
RNU7-1	RNA, U7 Small Nuclear 1	RNA Gene	12	GC12P009007	0.615764	https://www.genecards.org/cgi-bin/carddisp.pl?gene=RNU7-1
RPL13P5	Ribosomal Protein L13 Pseudogene 5	Pseudogene	12	GC12P006873	0.615764	https://www.genecards.org/cgi-bin/carddisp.pl?gene=RPL13P5
DSTNP2	DSTN Pseudogene 2	Pseudogene	9	GC12P008991	0.615764	https://www.genecards.org/cgi-bin/carddisp.pl?gene=DSTNP2
PEPC	Peptidase C	Protein Coding	5	GC01U990121	0.615764	https://www.genecards.org/cgi-bin/carddisp.pl?gene=PEPC
LOC109461484	Atrophin 1 Repeat Instability Region	Biological Region	2	GC12P009274	0.615764	https://www.genecards.org/cgi-bin/carddisp.pl?gene=LOC109461484
LEPQTL1	Leptin, Serum Levels Of	Genetic Locus	2	GC02U903086	0.615764	https://www.genecards.org/cgi-bin/carddisp.pl?gene=LEPQTL1
LOC106799839	Nonconserved Acetylation Island Sequence 91 Enhancer	Biological Region	1	GC12P009263	0.615764	https://www.genecards.org/cgi-bin/carddisp.pl?gene=LOC106799839
ADH5	Alcohol Dehydrogenase 5 (Class III), Chi Polypeptide	Protein Coding	47	GC04M099070	0.597507	https://www.genecards.org/cgi-bin/carddisp.pl?gene=ADH5
PPP2R1B	Protein Phosphatase 2 Scaffold Subunit Abeta	Protein Coding	47	GC11M111695	0.597507	https://www.genecards.org/cgi-bin/carddisp.pl?gene=PPP2R1B
GALM	Galactose Mutarotase	Protein Coding	46	GC02P038665	0.597507	https://www.genecards.org/cgi-bin/carddisp.pl?gene=GALM
PPP2CB	Protein Phosphatase 2 Catalytic Subunit Beta	Protein Coding	46	GC08M030762	0.597507	https://www.genecards.org/cgi-bin/carddisp.pl?gene=PPP2CB
ADH7	Alcohol Dehydrogenase 7 (Class IV), Mu Or Sigma Polypeptide	Protein Coding	45	GC04M099412	0.597507	https://www.genecards.org/cgi-bin/carddisp.pl?gene=ADH7
ADH4	Alcohol Dehydrogenase 4 (Class II), Pi Polypeptide	Protein Coding	45	GC04M099123	0.597507	https://www.genecards.org/cgi-bin/carddisp.pl?gene=ADH4
ADH1A	Alcohol Dehydrogenase 1A (Class I), Alpha Polypeptide	Protein Coding	43	GC04M099276	0.597507	https://www.genecards.org/cgi-bin/carddisp.pl?gene=ADH1A
ALDH3B1	Aldehyde Dehydrogenase 3 Family Member B1	Protein Coding	43	GC11P068027	0.597507	https://www.genecards.org/cgi-bin/carddisp.pl?gene=ALDH3B1
ADH1C	Alcohol Dehydrogenase 1C (Class I), Gamma Polypeptide	Protein Coding	43	GC04M099336	0.597507	https://www.genecards.org/cgi-bin/carddisp.pl?gene=ADH1C
ALDH3B2	Aldehyde Dehydrogenase 3 Family Member B2	Protein Coding	42	GC11M067662	0.597507	https://www.genecards.org/cgi-bin/carddisp.pl?gene=ALDH3B2
ADH6	Alcohol Dehydrogenase 6 (Class V)	Protein Coding	41	GC04M099202	0.597507	https://www.genecards.org/cgi-bin/carddisp.pl?gene=ADH6
ERBB3	Erb-B2 Receptor Tyrosine Kinase 3	Protein Coding	54	GC12P056108	0.596938	https://www.genecards.org/cgi-bin/carddisp.pl?gene=ERBB3
JAK2	Janus Kinase 2	Protein Coding	54	GC09P004985	0.596938	https://www.genecards.org/cgi-bin/carddisp.pl?gene=JAK2
CREBBP	CREB Binding Protein	Protein Coding	53	GC16M003726	0.596938	https://www.genecards.org/cgi-bin/carddisp.pl?gene=CREBBP
CXCR4	C-X-C Motif Chemokine Receptor 4	Protein Coding	53	GC02M136114	0.596938	https://www.genecards.org/cgi-bin/carddisp.pl?gene=CXCR4
MAPK10	Mitogen-Activated Protein Kinase 10	Protein Coding	52	GC04M085990	0.596938	https://www.genecards.org/cgi-bin/carddisp.pl?gene=MAPK10
THRB	Thyroid Hormone Receptor Beta	Protein Coding	52	GC03M024117	0.596938	https://www.genecards.org/cgi-bin/carddisp.pl?gene=THRB
MPO	Myeloperoxidase	Protein Coding	51	GC17M058269	0.596938	https://www.genecards.org/cgi-bin/carddisp.pl?gene=MPO
ESRRB	Estrogen Related Receptor Beta	Protein Coding	50	GC14P076310	0.596938	https://www.genecards.org/cgi-bin/carddisp.pl?gene=ESRRB
CBS	Cystathionine Beta-Synthase	Protein Coding	49	GC21M043053	0.596938	https://www.genecards.org/cgi-bin/carddisp.pl?gene=CBS
CSNK2A2	Casein Kinase 2 Alpha 2	Protein Coding	49	GC16M058157	0.596938	https://www.genecards.org/cgi-bin/carddisp.pl?gene=CSNK2A2
GALK1	Galactokinase 1	Protein Coding	49	GC17M075751	0.596938	https://www.genecards.org/cgi-bin/carddisp.pl?gene=GALK1
SPTLC2	Serine Palmitoyltransferase Long Chain Base Subunit 2	Protein Coding	49	GC14M077505	0.596938	https://www.genecards.org/cgi-bin/carddisp.pl?gene=SPTLC2
ENG	Endoglin	Protein Coding	47	GC09M127815	0.596938	https://www.genecards.org/cgi-bin/carddisp.pl?gene=ENG
EEF2K	Eukaryotic Elongation Factor 2 Kinase	Protein Coding	47	GC16P022217	0.596938	https://www.genecards.org/cgi-bin/carddisp.pl?gene=EEF2K
CTSL	Cathepsin L	Protein Coding	47	GC09P087725	0.596938	https://www.genecards.org/cgi-bin/carddisp.pl?gene=CTSL
HDAC9	Histone Deacetylase 9	Protein Coding	47	GC07P018086	0.596938	https://www.genecards.org/cgi-bin/carddisp.pl?gene=HDAC9
IMPDH2	Inosine Monophosphate Dehydrogenase 2	Protein Coding	47	GC03M049288	0.596938	https://www.genecards.org/cgi-bin/carddisp.pl?gene=IMPDH2
ISG15	ISG15 Ubiquitin Like Modifier	Protein Coding	47	GC01P001001	0.596938	https://www.genecards.org/cgi-bin/carddisp.pl?gene=ISG15
NPPA	Natriuretic Peptide A	Protein Coding	47	GC01M011846	0.596938	https://www.genecards.org/cgi-bin/carddisp.pl?gene=NPPA
SLC27A4	Solute Carrier Family 27 Member 4	Protein Coding	47	GC09P128340	0.596938	https://www.genecards.org/cgi-bin/carddisp.pl?gene=SLC27A4
S100B	S100 Calcium Binding Protein B	Protein Coding	47	GC21M047706	0.596938	https://www.genecards.org/cgi-bin/carddisp.pl?gene=S100B
UGDH	UDP-Glucose 6-Dehydrogenase	Protein Coding	47	GC04M039502	0.596938	https://www.genecards.org/cgi-bin/carddisp.pl?gene=UGDH
SPTLC1	Serine Palmitoyltransferase Long Chain Base Subunit 1	Protein Coding	47	GC09M092002	0.596938	https://www.genecards.org/cgi-bin/carddisp.pl?gene=SPTLC1
CRYAB	Crystallin Alpha B	Protein Coding	46	GC11M111908	0.596938	https://www.genecards.org/cgi-bin/carddisp.pl?gene=CRYAB
ADCY10	Adenylate Cyclase 10	Protein Coding	46	GC01M167809	0.596938	https://www.genecards.org/cgi-bin/carddisp.pl?gene=ADCY10
DPYSL2	Dihydropyrimidinase Like 2	Protein Coding	46	GC08P026514	0.596938	https://www.genecards.org/cgi-bin/carddisp.pl?gene=DPYSL2
HNF1A	HNF1 Homeobox A	Protein Coding	46	GC12P120978	0.596938	https://www.genecards.org/cgi-bin/carddisp.pl?gene=HNF1A
SHMT1	Serine Hydroxymethyltransferase 1	Protein Coding	46	GC17M020221	0.596938	https://www.genecards.org/cgi-bin/carddisp.pl?gene=SHMT1
RUVBL1	RuvB Like AAA ATPase 1	Protein Coding	46	GC03M128064	0.596938	https://www.genecards.org/cgi-bin/carddisp.pl?gene=RUVBL1
EIF4A1	Eukaryotic Translation Initiation Factor 4A1	Protein Coding	46	GC17P007572	0.596938	https://www.genecards.org/cgi-bin/carddisp.pl?gene=EIF4A1
FMR1	FMRP Translational Regulator 1	Protein Coding	45	GC0XP147916	0.596938	https://www.genecards.org/cgi-bin/carddisp.pl?gene=FMR1
HAT1	Histone Acetyltransferase 1	Protein Coding	45	GC02P171922	0.596938	https://www.genecards.org/cgi-bin/carddisp.pl?gene=HAT1
GHRL	Ghrelin And Obestatin Prepropeptide	Protein Coding	45	GC03M010285	0.596938	https://www.genecards.org/cgi-bin/carddisp.pl?gene=GHRL
MAP3K14	Mitogen-Activated Protein Kinase Kinase Kinase 14	Protein Coding	45	GC17M045263	0.596938	https://www.genecards.org/cgi-bin/carddisp.pl?gene=MAP3K14
ADM	Adrenomedullin	Protein Coding	45	GC11P010304	0.596938	https://www.genecards.org/cgi-bin/carddisp.pl?gene=ADM
SLC25A11	Solute Carrier Family 25 Member 11	Protein Coding	45	GC17M004937	0.596938	https://www.genecards.org/cgi-bin/carddisp.pl?gene=SLC25A11
SLC17A5	Solute Carrier Family 17 Member 5	Protein Coding	45	GC06M073593	0.596938	https://www.genecards.org/cgi-bin/carddisp.pl?gene=SLC17A5
NAGK	N-Acetylglucosamine Kinase	Protein Coding	45	GC02P071064	0.596938	https://www.genecards.org/cgi-bin/carddisp.pl?gene=NAGK
USF1	Upstream Transcription Factor 1	Protein Coding	45	GC01M161039	0.596938	https://www.genecards.org/cgi-bin/carddisp.pl?gene=USF1
AMFR	Autocrine Motility Factor Receptor	Protein Coding	44	GC16M056361	0.596938	https://www.genecards.org/cgi-bin/carddisp.pl?gene=AMFR
NR0B2	Nuclear Receptor Subfamily 0 Group B Member 2	Protein Coding	44	GC01M026922	0.596938	https://www.genecards.org/cgi-bin/carddisp.pl?gene=NR0B2
SERPINB5	Serpin Family B Member 5	Protein Coding	44	GC18P063476	0.596938	https://www.genecards.org/cgi-bin/carddisp.pl?gene=SERPINB5
SLC39A14	Solute Carrier Family 39 Member 14	Protein Coding	44	GC08P022367	0.596938	https://www.genecards.org/cgi-bin/carddisp.pl?gene=SLC39A14
COMMD1	Copper Metabolism Domain Containing 1	Protein Coding	43	GC02P061888	0.596938	https://www.genecards.org/cgi-bin/carddisp.pl?gene=COMMD1
CPT1C	Carnitine Palmitoyltransferase 1C	Protein Coding	43	GC19P049690	0.596938	https://www.genecards.org/cgi-bin/carddisp.pl?gene=CPT1C
HBA1	Hemoglobin Subunit Alpha 1	Protein Coding	43	GC16P001557	0.596938	https://www.genecards.org/cgi-bin/carddisp.pl?gene=HBA1
GAS1	Growth Arrest Specific 1	Protein Coding	43	GC09M086944	0.596938	https://www.genecards.org/cgi-bin/carddisp.pl?gene=GAS1
SLC13A5	Solute Carrier Family 13 Member 5	Protein Coding	43	GC17M006684	0.596938	https://www.genecards.org/cgi-bin/carddisp.pl?gene=SLC13A5
PSME2	Proteasome Activator Subunit 2	Protein Coding	43	GC14M024143	0.596938	https://www.genecards.org/cgi-bin/carddisp.pl?gene=PSME2
RIPK3	Receptor Interacting Serine/Threonine Kinase 3	Protein Coding	43	GC14M024336	0.596938	https://www.genecards.org/cgi-bin/carddisp.pl?gene=RIPK3
SLC3A2	Solute Carrier Family 3 Member 2	Protein Coding	43	GC11P062856	0.596938	https://www.genecards.org/cgi-bin/carddisp.pl?gene=SLC3A2
YME1L1	YME1 Like 1 ATPase	Protein Coding	43	GC10M027110	0.596938	https://www.genecards.org/cgi-bin/carddisp.pl?gene=YME1L1
SLC30A8	Solute Carrier Family 30 Member 8	Protein Coding	43	GC08P116950	0.596938	https://www.genecards.org/cgi-bin/carddisp.pl?gene=SLC30A8
SLC5A8	Solute Carrier Family 5 Member 8	Protein Coding	43	GC12M101155	0.596938	https://www.genecards.org/cgi-bin/carddisp.pl?gene=SLC5A8
NKX6-1	NK6 Homeobox 1	Protein Coding	42	GC04M084491	0.596938	https://www.genecards.org/cgi-bin/carddisp.pl?gene=NKX6-1
SIRT7	Sirtuin 7	Protein Coding	42	GC17M081911	0.596938	https://www.genecards.org/cgi-bin/carddisp.pl?gene=SIRT7
MEST	Mesoderm Specific Transcript	Protein Coding	41	GC07P130486	0.596938	https://www.genecards.org/cgi-bin/carddisp.pl?gene=MEST
GSDMD	Gasdermin D	Protein Coding	41	GC08P143553	0.596938	https://www.genecards.org/cgi-bin/carddisp.pl?gene=GSDMD
PPP1R8	Protein Phosphatase 1 Regulatory Subunit 8	Protein Coding	41	GC01P027830	0.596938	https://www.genecards.org/cgi-bin/carddisp.pl?gene=PPP1R8
MYBBP1A	MYB Binding Protein 1a	Protein Coding	41	GC17M004538	0.596938	https://www.genecards.org/cgi-bin/carddisp.pl?gene=MYBBP1A
SLC16A9	Solute Carrier Family 16 Member 9	Protein Coding	41	GC10M059650	0.596938	https://www.genecards.org/cgi-bin/carddisp.pl?gene=SLC16A9
SMG1	SMG1 Nonsense Mediated MRNA Decay Associated PI3K Related Kinase	Protein Coding	41	GC16M018805	0.596938	https://www.genecards.org/cgi-bin/carddisp.pl?gene=SMG1
TPM4	Tropomyosin 4	Protein Coding	41	GC19P024422	0.596938	https://www.genecards.org/cgi-bin/carddisp.pl?gene=TPM4
SRSF3	Serine And Arginine Rich Splicing Factor 3	Protein Coding	41	GC06P049513	0.596938	https://www.genecards.org/cgi-bin/carddisp.pl?gene=SRSF3
SLC16A10	Solute Carrier Family 16 Member 10	Protein Coding	40	GC06P111087	0.596938	https://www.genecards.org/cgi-bin/carddisp.pl?gene=SLC16A10
FIS1	Fission, Mitochondrial 1	Protein Coding	39	GC07M101239	0.596938	https://www.genecards.org/cgi-bin/carddisp.pl?gene=FIS1
PDP2	Pyruvate Dehyrogenase Phosphatase Catalytic Subunit 2	Protein Coding	39	GC16P066881	0.596938	https://www.genecards.org/cgi-bin/carddisp.pl?gene=PDP2
RNH1	Ribonuclease/Angiogenin Inhibitor 1	Protein Coding	39	GC11M000723	0.596938	https://www.genecards.org/cgi-bin/carddisp.pl?gene=RNH1
SLC25A27	Solute Carrier Family 25 Member 27	Protein Coding	39	GC06P046652	0.596938	https://www.genecards.org/cgi-bin/carddisp.pl?gene=SLC25A27
BRAT1	BRCA1 Associated ATM Activator 1	Protein Coding	39	GC07M002601	0.596938	https://www.genecards.org/cgi-bin/carddisp.pl?gene=BRAT1
ING4	Inhibitor Of Growth Family Member 4	Protein Coding	38	GC12M006650	0.596938	https://www.genecards.org/cgi-bin/carddisp.pl?gene=ING4
NDUFA4L2	NDUFA4 Mitochondrial Complex Associated Like 2	Protein Coding	38	GC12M057234	0.596938	https://www.genecards.org/cgi-bin/carddisp.pl?gene=NDUFA4L2
DNPH1	2'-Deoxynucleoside 5'-Phosphate N-Hydrolase 1	Protein Coding	35	GC06M043657	0.596938	https://www.genecards.org/cgi-bin/carddisp.pl?gene=DNPH1
FAM162A	Family With Sequence Similarity 162 Member A	Protein Coding	35	GC03P122384	0.596938	https://www.genecards.org/cgi-bin/carddisp.pl?gene=FAM162A
HTN3	Histatin 3	Protein Coding	35	GC04P070028	0.596938	https://www.genecards.org/cgi-bin/carddisp.pl?gene=HTN3
RMND5B	Required For Meiotic Nuclear Division 5 Homolog B	Protein Coding	35	GC05P178130	0.596938	https://www.genecards.org/cgi-bin/carddisp.pl?gene=RMND5B
TSKU	Tsukushi, Small Leucine Rich Proteoglycan	Protein Coding	35	GC11P076782	0.596938	https://www.genecards.org/cgi-bin/carddisp.pl?gene=TSKU
SLC16A14	Solute Carrier Family 16 Member 14	Protein Coding	34	GC02M230034	0.596938	https://www.genecards.org/cgi-bin/carddisp.pl?gene=SLC16A14
EMC3	ER Membrane Protein Complex Subunit 3	Protein Coding	32	GC03M009978	0.596938	https://www.genecards.org/cgi-bin/carddisp.pl?gene=EMC3
FAM210B	Family With Sequence Similarity 210 Member B	Protein Coding	32	GC20P056358	0.596938	https://www.genecards.org/cgi-bin/carddisp.pl?gene=FAM210B
SLC16A13	Solute Carrier Family 16 Member 13	Protein Coding	32	GC17P007036	0.596938	https://www.genecards.org/cgi-bin/carddisp.pl?gene=SLC16A13
TUBA4B	Tubulin Alpha 4b	Protein Coding	25	GC02P219253	0.596938	https://www.genecards.org/cgi-bin/carddisp.pl?gene=TUBA4B
LINC00470	Long Intergenic Non-Protein Coding RNA 470	RNA Gene	21	GC18M001268	0.596938	https://www.genecards.org/cgi-bin/carddisp.pl?gene=LINC00470
CRNDE	Colorectal Neoplasia Differentially Expressed	RNA Gene	20	GC16M054845	0.596938	https://www.genecards.org/cgi-bin/carddisp.pl?gene=CRNDE
MIR124-3	MicroRNA 124-3	RNA Gene	17	GC20P063180	0.596938	https://www.genecards.org/cgi-bin/carddisp.pl?gene=MIR124-3
MIR202	MicroRNA 202	RNA Gene	17	GC10M133247	0.596938	https://www.genecards.org/cgi-bin/carddisp.pl?gene=MIR202
LINC01116	Long Intergenic Non-Protein Coding RNA 1116	RNA Gene	16	GC02M176629	0.596938	https://www.genecards.org/cgi-bin/carddisp.pl?gene=LINC01116
MIR2909	MicroRNA 2909	RNA Gene	8	GC17P037033	0.596938	https://www.genecards.org/cgi-bin/carddisp.pl?gene=MIR2909
PGK1P1	Phosphoglycerate Kinase 1 Pseudogene 1	Pseudogene	7	GC0XM068070	0.596938	https://www.genecards.org/cgi-bin/carddisp.pl?gene=PGK1P1
BNIP3P1	BCL2 Interacting Protein 3 Pseudogene 1	Pseudogene	6	GC14P028264	0.596938	https://www.genecards.org/cgi-bin/carddisp.pl?gene=BNIP3P1
FRAXA	Fragile Site, Folic Acid Type, Rare, Fra(X)(Q27.3) A (Macroorchidism, Mental Retardation)	Biological Region	6	GC0XP147917	0.596938	https://www.genecards.org/cgi-bin/carddisp.pl?gene=FRAXA
EIF2AK3	Eukaryotic Translation Initiation Factor 2 Alpha Kinase 3	Protein Coding	50	GC02M088556	0.555513	https://www.genecards.org/cgi-bin/carddisp.pl?gene=EIF2AK3
BAP1	BRCA1 Associated Protein 1	Protein Coding	47	GC03M052401	0.555513	https://www.genecards.org/cgi-bin/carddisp.pl?gene=BAP1
ACO1	Aconitase 1	Protein Coding	45	GC09P032374	0.555513	https://www.genecards.org/cgi-bin/carddisp.pl?gene=ACO1
BMP6	Bone Morphogenetic Protein 6	Protein Coding	45	GC06P007726	0.555513	https://www.genecards.org/cgi-bin/carddisp.pl?gene=BMP6
SFRP4	Secreted Frizzled Related Protein 4	Protein Coding	45	GC07M037912	0.555513	https://www.genecards.org/cgi-bin/carddisp.pl?gene=SFRP4
NFIX	Nuclear Factor I X	Protein Coding	43	GC19P012996	0.555513	https://www.genecards.org/cgi-bin/carddisp.pl?gene=NFIX
KLK10	Kallikrein Related Peptidase 10	Protein Coding	41	GC19M051012	0.555513	https://www.genecards.org/cgi-bin/carddisp.pl?gene=KLK10
SRSF5	Serine And Arginine Rich Splicing Factor 5	Protein Coding	40	GC14P069727	0.555513	https://www.genecards.org/cgi-bin/carddisp.pl?gene=SRSF5
ATG2B	Autophagy Related 2B	Protein Coding	35	GC14M096281	0.555513	https://www.genecards.org/cgi-bin/carddisp.pl?gene=ATG2B
MIR378E	MicroRNA 378e	RNA Gene	12	GC05P170028	0.555513	https://www.genecards.org/cgi-bin/carddisp.pl?gene=MIR378E
MMP3	Matrix Metallopeptidase 3	Protein Coding	52	GC11M102835	0.501963	https://www.genecards.org/cgi-bin/carddisp.pl?gene=MMP3
MMP13	Matrix Metallopeptidase 13	Protein Coding	51	GC11M102942	0.501963	https://www.genecards.org/cgi-bin/carddisp.pl?gene=MMP13
ACE	Angiotensin I Converting Enzyme	Protein Coding	50	GC17P063477	0.501963	https://www.genecards.org/cgi-bin/carddisp.pl?gene=ACE
RDX	Radixin	Protein Coding	50	GC11M109864	0.501963	https://www.genecards.org/cgi-bin/carddisp.pl?gene=RDX
TUBB3	Tubulin Beta 3 Class III	Protein Coding	50	GC16P089919	0.501963	https://www.genecards.org/cgi-bin/carddisp.pl?gene=TUBB3
NR1D1	Nuclear Receptor Subfamily 1 Group D Member 1	Protein Coding	49	GC17M040092	0.501963	https://www.genecards.org/cgi-bin/carddisp.pl?gene=NR1D1
CA8	Carbonic Anhydrase 8	Protein Coding	48	GC08M060187	0.501963	https://www.genecards.org/cgi-bin/carddisp.pl?gene=CA8
PTS	6-Pyruvoyltetrahydropterin Synthase	Protein Coding	48	GC11P112226	0.501963	https://www.genecards.org/cgi-bin/carddisp.pl?gene=PTS
SOX2	SRY-Box Transcription Factor 2	Protein Coding	48	GC03P181711	0.501963	https://www.genecards.org/cgi-bin/carddisp.pl?gene=SOX2
MSN	Moesin	Protein Coding	48	GC0XP065588	0.501963	https://www.genecards.org/cgi-bin/carddisp.pl?gene=MSN
ATIC	5-Aminoimidazole-4-Carboxamide Ribonucleotide Formyltransferase/IMP Cyclohydrolase	Protein Coding	47	GC02P215311	0.501963	https://www.genecards.org/cgi-bin/carddisp.pl?gene=ATIC
CUL3	Cullin 3	Protein Coding	47	GC02M224470	0.501963	https://www.genecards.org/cgi-bin/carddisp.pl?gene=CUL3
CETP	Cholesteryl Ester Transfer Protein	Protein Coding	47	GC16P056961	0.501963	https://www.genecards.org/cgi-bin/carddisp.pl?gene=CETP
GYG1	Glycogenin 1	Protein Coding	47	GC03P148991	0.501963	https://www.genecards.org/cgi-bin/carddisp.pl?gene=GYG1
ITPR2	Inositol 1,4,5-Trisphosphate Receptor Type 2	Protein Coding	47	GC12M026336	0.501963	https://www.genecards.org/cgi-bin/carddisp.pl?gene=ITPR2
UBE2I	Ubiquitin Conjugating Enzyme E2 I	Protein Coding	47	GC16P001654	0.501963	https://www.genecards.org/cgi-bin/carddisp.pl?gene=UBE2I
VCAN	Versican	Protein Coding	47	GC05P083471	0.501963	https://www.genecards.org/cgi-bin/carddisp.pl?gene=VCAN
CD38	CD38 Molecule	Protein Coding	46	GC04P015779	0.501963	https://www.genecards.org/cgi-bin/carddisp.pl?gene=CD38
CBR3	Carbonyl Reductase 3	Protein Coding	46	GC21P036134	0.501963	https://www.genecards.org/cgi-bin/carddisp.pl?gene=CBR3
EIF4A2	Eukaryotic Translation Initiation Factor 4A2	Protein Coding	46	GC03P186783	0.501963	https://www.genecards.org/cgi-bin/carddisp.pl?gene=EIF4A2
PHKA2	Phosphorylase Kinase Regulatory Subunit Alpha 2	Protein Coding	46	GC0XM018892	0.501963	https://www.genecards.org/cgi-bin/carddisp.pl?gene=PHKA2
SERPINH1	Serpin Family H Member 1	Protein Coding	46	GC11P075562	0.501963	https://www.genecards.org/cgi-bin/carddisp.pl?gene=SERPINH1
PPT1	Palmitoyl-Protein Thioesterase 1	Protein Coding	46	GC01M040072	0.501963	https://www.genecards.org/cgi-bin/carddisp.pl?gene=PPT1
TGFBI	Transforming Growth Factor Beta Induced	Protein Coding	46	GC05P136027	0.501963	https://www.genecards.org/cgi-bin/carddisp.pl?gene=TGFBI
TUBA8	Tubulin Alpha 8	Protein Coding	46	GC22P018110	0.501963	https://www.genecards.org/cgi-bin/carddisp.pl?gene=TUBA8
RALBP1	RalA Binding Protein 1	Protein Coding	46	GC18P009465	0.501963	https://www.genecards.org/cgi-bin/carddisp.pl?gene=RALBP1
CANX	Calnexin	Protein Coding	45	GC05P179678	0.501963	https://www.genecards.org/cgi-bin/carddisp.pl?gene=CANX
ARHGAP1	Rho GTPase Activating Protein 1	Protein Coding	45	GC11M063589	0.501963	https://www.genecards.org/cgi-bin/carddisp.pl?gene=ARHGAP1
HSPA1L	Heat Shock Protein Family A (Hsp70) Member 1 Like	Protein Coding	45	GC06M031809	0.501963	https://www.genecards.org/cgi-bin/carddisp.pl?gene=HSPA1L
PSMD7	Proteasome 26S Subunit, Non-ATPase 7	Protein Coding	45	GC16P074296	0.501963	https://www.genecards.org/cgi-bin/carddisp.pl?gene=PSMD7
PMPCA	Peptidase, Mitochondrial Processing Subunit Alpha	Protein Coding	45	GC09P136410	0.501963	https://www.genecards.org/cgi-bin/carddisp.pl?gene=PMPCA
TUFM	Tu Translation Elongation Factor, Mitochondrial	Protein Coding	45	GC16M028969	0.501963	https://www.genecards.org/cgi-bin/carddisp.pl?gene=TUFM
PROM1	Prominin 1	Protein Coding	45	GC04M015965	0.501963	https://www.genecards.org/cgi-bin/carddisp.pl?gene=PROM1
KPNB1	Karyopherin Subunit Beta 1	Protein Coding	45	GC17P047649	0.501963	https://www.genecards.org/cgi-bin/carddisp.pl?gene=KPNB1
VPS35	VPS35 Retromer Complex Component	Protein Coding	45	GC16M046720	0.501963	https://www.genecards.org/cgi-bin/carddisp.pl?gene=VPS35
BAMBI	BMP And Activin Membrane Bound Inhibitor	Protein Coding	44	GC10P028685	0.501963	https://www.genecards.org/cgi-bin/carddisp.pl?gene=BAMBI
EIF5A	Eukaryotic Translation Initiation Factor 5A	Protein Coding	44	GC17P007306	0.501963	https://www.genecards.org/cgi-bin/carddisp.pl?gene=EIF5A
PRDX4	Peroxiredoxin 4	Protein Coding	44	GC0XP023665	0.501963	https://www.genecards.org/cgi-bin/carddisp.pl?gene=PRDX4
EIF3A	Eukaryotic Translation Initiation Factor 3 Subunit A	Protein Coding	43	GC10M119034	0.501963	https://www.genecards.org/cgi-bin/carddisp.pl?gene=EIF3A
ACTR3	Actin Related Protein 3	Protein Coding	43	GC02P113889	0.501963	https://www.genecards.org/cgi-bin/carddisp.pl?gene=ACTR3
ANXA6	Annexin A6	Protein Coding	43	GC05M151100	0.501963	https://www.genecards.org/cgi-bin/carddisp.pl?gene=ANXA6
ABCB5	ATP Binding Cassette Subfamily B Member 5	Protein Coding	43	GC07P020615	0.501963	https://www.genecards.org/cgi-bin/carddisp.pl?gene=ABCB5
MAP1LC3B	Microtubule Associated Protein 1 Light Chain 3 Beta	Protein Coding	43	GC16P087384	0.501963	https://www.genecards.org/cgi-bin/carddisp.pl?gene=MAP1LC3B
ATP6V0A1	ATPase H+ Transporting V0 Subunit A1	Protein Coding	43	GC17P042458	0.501963	https://www.genecards.org/cgi-bin/carddisp.pl?gene=ATP6V0A1
NME4	NME/NM23 Nucleoside Diphosphate Kinase 4	Protein Coding	43	GC16P000396	0.501963	https://www.genecards.org/cgi-bin/carddisp.pl?gene=NME4
OLA1	Obg Like ATPase 1	Protein Coding	43	GC02M174072	0.501963	https://www.genecards.org/cgi-bin/carddisp.pl?gene=OLA1
PABPC1	Poly(A) Binding Protein Cytoplasmic 1	Protein Coding	43	GC08M100685	0.501963	https://www.genecards.org/cgi-bin/carddisp.pl?gene=PABPC1
PFAS	Phosphoribosylformylglycinamidine Synthase	Protein Coding	43	GC17P008247	0.501963	https://www.genecards.org/cgi-bin/carddisp.pl?gene=PFAS
DNAJA1	DnaJ Heat Shock Protein Family (Hsp40) Member A1	Protein Coding	42	GC09P033025	0.501963	https://www.genecards.org/cgi-bin/carddisp.pl?gene=DNAJA1
EEF1G	Eukaryotic Translation Elongation Factor 1 Gamma	Protein Coding	42	GC11M063873	0.501963	https://www.genecards.org/cgi-bin/carddisp.pl?gene=EEF1G
CCT7	Chaperonin Containing TCP1 Subunit 7	Protein Coding	42	GC02P073233	0.501963	https://www.genecards.org/cgi-bin/carddisp.pl?gene=CCT7
CRY2	Cryptochrome Circadian Regulator 2	Protein Coding	42	GC11P046015	0.501963	https://www.genecards.org/cgi-bin/carddisp.pl?gene=CRY2
GSTZ1	Glutathione S-Transferase Zeta 1	Protein Coding	42	GC14P077320	0.501963	https://www.genecards.org/cgi-bin/carddisp.pl?gene=GSTZ1
MED1	Mediator Complex Subunit 1	Protein Coding	42	GC17M039404	0.501963	https://www.genecards.org/cgi-bin/carddisp.pl?gene=MED1
KPNA1	Karyopherin Subunit Alpha 1	Protein Coding	42	GC03M122421	0.501963	https://www.genecards.org/cgi-bin/carddisp.pl?gene=KPNA1
PCBP2	Poly(RC) Binding Protein 2	Protein Coding	42	GC12P053452	0.501963	https://www.genecards.org/cgi-bin/carddisp.pl?gene=PCBP2
THOP1	Thimet Oligopeptidase 1	Protein Coding	42	GC19P002785	0.501963	https://www.genecards.org/cgi-bin/carddisp.pl?gene=THOP1
DST	Dystonin	Protein Coding	42	GC06M056457	0.501963	https://www.genecards.org/cgi-bin/carddisp.pl?gene=DST
FBXL3	F-Box And Leucine Rich Repeat Protein 3	Protein Coding	41	GC13M076992	0.501963	https://www.genecards.org/cgi-bin/carddisp.pl?gene=FBXL3
G3BP1	G3BP Stress Granule Assembly Factor 1	Protein Coding	41	GC05P151771	0.501963	https://www.genecards.org/cgi-bin/carddisp.pl?gene=G3BP1
GDI2	GDP Dissociation Inhibitor 2	Protein Coding	41	GC10M005765	0.501963	https://www.genecards.org/cgi-bin/carddisp.pl?gene=GDI2
NT5C3A	5'-Nucleotidase, Cytosolic IIIA	Protein Coding	41	GC07M033014	0.501963	https://www.genecards.org/cgi-bin/carddisp.pl?gene=NT5C3A
TTF2	Transcription Termination Factor 2	Protein Coding	41	GC01P117060	0.501963	https://www.genecards.org/cgi-bin/carddisp.pl?gene=TTF2
ACIN1	Apoptotic Chromatin Condensation Inducer 1	Protein Coding	40	GC14M023058	0.501963	https://www.genecards.org/cgi-bin/carddisp.pl?gene=ACIN1
EDARADD	EDAR Associated Death Domain	Protein Coding	40	GC01P236348	0.501963	https://www.genecards.org/cgi-bin/carddisp.pl?gene=EDARADD
HSPA14	Heat Shock Protein Family A (Hsp70) Member 14	Protein Coding	40	GC10P014839	0.501963	https://www.genecards.org/cgi-bin/carddisp.pl?gene=HSPA14
DDX46	DEAD-Box Helicase 46	Protein Coding	40	GC05P134758	0.501963	https://www.genecards.org/cgi-bin/carddisp.pl?gene=DDX46
IL23A	Interleukin 23 Subunit Alpha	Protein Coding	40	GC12P056335	0.501963	https://www.genecards.org/cgi-bin/carddisp.pl?gene=IL23A
MRPL13	Mitochondrial Ribosomal Protein L13	Protein Coding	40	GC08M120377	0.501963	https://www.genecards.org/cgi-bin/carddisp.pl?gene=MRPL13
NCBP1	Nuclear Cap Binding Protein Subunit 1	Protein Coding	40	GC09P097633	0.501963	https://www.genecards.org/cgi-bin/carddisp.pl?gene=NCBP1
BZW2	Basic Leucine Zipper And W2 Domains 2	Protein Coding	40	GC07P016646	0.501963	https://www.genecards.org/cgi-bin/carddisp.pl?gene=BZW2
HIVEP2	HIVEP Zinc Finger 2	Protein Coding	39	GC06M142751	0.501963	https://www.genecards.org/cgi-bin/carddisp.pl?gene=HIVEP2
KARS1	Lysyl-TRNA Synthetase 1	Protein Coding	39	GC16M075628	0.501963	https://www.genecards.org/cgi-bin/carddisp.pl?gene=KARS1
NAP1L4	Nucleosome Assembly Protein 1 Like 4	Protein Coding	39	GC11M002944	0.501963	https://www.genecards.org/cgi-bin/carddisp.pl?gene=NAP1L4
WARS1	Tryptophanyl-TRNA Synthetase 1	Protein Coding	39	GC14M100334	0.501963	https://www.genecards.org/cgi-bin/carddisp.pl?gene=WARS1
HMCN1	Hemicentin 1	Protein Coding	38	GC01P185734	0.501963	https://www.genecards.org/cgi-bin/carddisp.pl?gene=HMCN1
MYO18A	Myosin XVIIIA	Protein Coding	38	GC17M030261	0.501963	https://www.genecards.org/cgi-bin/carddisp.pl?gene=MYO18A
DNAH2	Dynein Axonemal Heavy Chain 2	Protein Coding	37	GC17P007717	0.501963	https://www.genecards.org/cgi-bin/carddisp.pl?gene=DNAH2
IPO4	Importin 4	Protein Coding	37	GC14M024181	0.501963	https://www.genecards.org/cgi-bin/carddisp.pl?gene=IPO4
IPO9	Importin 9	Protein Coding	36	GC01P201829	0.501963	https://www.genecards.org/cgi-bin/carddisp.pl?gene=IPO9
MNS1	Meiosis Specific Nuclear Structural 1	Protein Coding	36	GC15M056421	0.501963	https://www.genecards.org/cgi-bin/carddisp.pl?gene=MNS1
SEPTIN9	Septin 9	Protein Coding	36	GC17P077282	0.501963	https://www.genecards.org/cgi-bin/carddisp.pl?gene=SEPTIN9
OCIAD1	OCIA Domain Containing 1	Protein Coding	36	GC04P048805	0.501963	https://www.genecards.org/cgi-bin/carddisp.pl?gene=OCIAD1
SARS1	Seryl-TRNA Synthetase 1	Protein Coding	36	GC01P109214	0.501963	https://www.genecards.org/cgi-bin/carddisp.pl?gene=SARS1
ERO1A	Endoplasmic Reticulum Oxidoreductase 1 Alpha	Protein Coding	35	GC14M052640	0.501963	https://www.genecards.org/cgi-bin/carddisp.pl?gene=ERO1A
ACRBP	Acrosin Binding Protein	Protein Coding	35	GC12M006638	0.501963	https://www.genecards.org/cgi-bin/carddisp.pl?gene=ACRBP
ZBTB2	Zinc Finger And BTB Domain Containing 2	Protein Coding	35	GC06M151364	0.501963	https://www.genecards.org/cgi-bin/carddisp.pl?gene=ZBTB2
KCTD2	Potassium Channel Tetramerization Domain Containing 2	Protein Coding	34	GC17P075032	0.501963	https://www.genecards.org/cgi-bin/carddisp.pl?gene=KCTD2
MTFR2	Mitochondrial Fission Regulator 2	Protein Coding	32	GC06M136231	0.501963	https://www.genecards.org/cgi-bin/carddisp.pl?gene=MTFR2
SEPTIN7	Septin 7	Protein Coding	32	GC07P035853	0.501963	https://www.genecards.org/cgi-bin/carddisp.pl?gene=SEPTIN7
MEG3	Maternally Expressed 3	RNA Gene	30	GC14P105271	0.501963	https://www.genecards.org/cgi-bin/carddisp.pl?gene=MEG3
ATP5MC1	ATP Synthase Membrane Subunit C Locus 1	Protein Coding	30	GC17P048893	0.501963	https://www.genecards.org/cgi-bin/carddisp.pl?gene=ATP5MC1
MIR133B	MicroRNA 133b	RNA Gene	22	GC06P052148	0.501963	https://www.genecards.org/cgi-bin/carddisp.pl?gene=MIR133B
MIR196A2	MicroRNA 196a-2	RNA Gene	21	GC12P054244	0.501963	https://www.genecards.org/cgi-bin/carddisp.pl?gene=MIR196A2
MIR196A1	MicroRNA 196a-1	RNA Gene	20	GC17M048632	0.501963	https://www.genecards.org/cgi-bin/carddisp.pl?gene=MIR196A1
LINC01554	Long Intergenic Non-Protein Coding RNA 1554	RNA Gene	20	GC05P095838	0.501963	https://www.genecards.org/cgi-bin/carddisp.pl?gene=LINC01554
MIR196B	MicroRNA 196b	RNA Gene	19	GC07M027293	0.501963	https://www.genecards.org/cgi-bin/carddisp.pl?gene=MIR196B
MIR148A	MicroRNA 148a	RNA Gene	19	GC07M025993	0.501963	https://www.genecards.org/cgi-bin/carddisp.pl?gene=MIR148A
MIR19A	MicroRNA 19a	RNA Gene	19	GC13P091443	0.501963	https://www.genecards.org/cgi-bin/carddisp.pl?gene=MIR19A
MIR330	MicroRNA 330	RNA Gene	19	GC19M045669	0.501963	https://www.genecards.org/cgi-bin/carddisp.pl?gene=MIR330
MIR181D	MicroRNA 181d	RNA Gene	17	GC19P013874	0.501963	https://www.genecards.org/cgi-bin/carddisp.pl?gene=MIR181D
MIR425	MicroRNA 425	RNA Gene	17	GC03M049278	0.501963	https://www.genecards.org/cgi-bin/carddisp.pl?gene=MIR425
MIR194-1	MicroRNA 194-1	RNA Gene	16	GC01M220118	0.501963	https://www.genecards.org/cgi-bin/carddisp.pl?gene=MIR194-1
MIR384	MicroRNA 384	RNA Gene	9	GC0XM076919	0.501963	https://www.genecards.org/cgi-bin/carddisp.pl?gene=MIR384
KRT8P3	Keratin 8 Pseudogene 3	Pseudogene	8	GC08P061578	0.501963	https://www.genecards.org/cgi-bin/carddisp.pl?gene=KRT8P3
ERBB4	Erb-B2 Receptor Tyrosine Kinase 4	Protein Coding	56	GC02M211375	0.422099	https://www.genecards.org/cgi-bin/carddisp.pl?gene=ERBB4
RAF1	Raf-1 Proto-Oncogene, Serine/Threonine Kinase	Protein Coding	55	GC03M012583	0.422099	https://www.genecards.org/cgi-bin/carddisp.pl?gene=RAF1
KIT	KIT Proto-Oncogene, Receptor Tyrosine Kinase	Protein Coding	54	GC04P054657	0.422099	https://www.genecards.org/cgi-bin/carddisp.pl?gene=KIT
NTRK2	Neurotrophic Receptor Tyrosine Kinase 2	Protein Coding	54	GC09P084668	0.422099	https://www.genecards.org/cgi-bin/carddisp.pl?gene=NTRK2
EPHA2	EPH Receptor A2	Protein Coding	53	GC01M016124	0.422099	https://www.genecards.org/cgi-bin/carddisp.pl?gene=EPHA2
ADAM10	ADAM Metallopeptidase Domain 10	Protein Coding	53	GC15M058588	0.422099	https://www.genecards.org/cgi-bin/carddisp.pl?gene=ADAM10
PRKAR1A	Protein Kinase CAMP-Dependent Type I Regulatory Subunit Alpha	Protein Coding	53	GC17P068439	0.422099	https://www.genecards.org/cgi-bin/carddisp.pl?gene=PRKAR1A
AXL	AXL Receptor Tyrosine Kinase	Protein Coding	52	GC19P041219	0.422099	https://www.genecards.org/cgi-bin/carddisp.pl?gene=AXL
COMT	Catechol-O-Methyltransferase	Protein Coding	52	GC22P019941	0.422099	https://www.genecards.org/cgi-bin/carddisp.pl?gene=COMT
ADAM17	ADAM Metallopeptidase Domain 17	Protein Coding	52	GC02M009488	0.422099	https://www.genecards.org/cgi-bin/carddisp.pl?gene=ADAM17
[truncated: 530 more rows]
