# Supplementary material for: A Prognostic Model of Differentiated Thyroid Cancer Based on Up-Regulated Glycolysis-Related Genes
Source: Front Endocrinol (Lausanne). 2022 Apr 22;13:775278. doi: 10.3389/fendo.2022.775278 (PMC9072639; doi:10.3389/fendo.2022.775278)
Supplement: Supplementary file 14 [file Table_4.xlsx]

## Sheet: Sheet1
Supplemental Table 4. Function of the four GRGs in glycolysis
Genes	Function	References
ADM	involved in the regulation of glycolytic metabolism in Rotary cell	[1]
CD44	regulate glucose uptake, cellular ATP production and regulation of lactate production by targeting LDH	[2-8]
MKI67	affect the efficiency of glycolysis by targeting PFKFB3	[9, 10]
TYMS	regulate the expression levels of glycolytic enzymes (PKM2 and LDHA)	[11, 12]
References
1	Chen L, Yang X, Cui X, Jiang M, Gui Y, Zhang Y, et al. Adrenomedullin is a key Protein Mediating Rotary Cell Culture System that Induces the Effects of Simulated Microgravity on Human Breast Cancer Cells. Microgravity Science and Technology. 2015; 27: 417-26.
2	Tamada M, Nagano O, Tateyama S, Ohmura M, Yae T, Ishimoto T, et al. Modulation of Glucose Metabolism by CD44 Contributes to Antioxidant Status and Drug Resistance in Cancer Cells. Cancer Research. 2012; 72: 1438-48.
3	Nam K, Oh S, Shin I. Ablation of CD44 induces glycolysis-to-oxidative phosphorylation transition via modulation of the c-Src–Akt–LKB1–AMPKα pathway. Biochemical Journal. 2016; 473: 3013-30.
4	Christofk HR, Vander Heiden MG, Harris MH, Ramanathan A, Gerszten RE, Wei R, et al. The M2 splice isoform of pyruvate kinase is important for cancer metabolism and tumour growth. Nature. 2008; 452: 230-3.
5	Christofk HR, Vander Heiden MG, Wu N, Asara JM, Cantley LC. Pyruvate kinase M2 is a phosphotyrosine-binding protein. Nature. 2008; 452: 181-6.
6	Hitosugi T, Kang S, Vander Heiden MG, Chung T-W, Elf S, Lythgoe K, et al. Tyrosine phosphorylation inhibits PKM2 to promote the Warburg effect and tumor growth. Science signaling. 2009; 2: ra73-ra.
7	Tamada M, Nagano O, Tateyama S, Ohmura M, Yae T, Ishimoto T, et al. Modulation of glucose metabolism by CD44 contributes to antioxidant status and drug resistance in cancer cells. Cancer Res. 2012; 72: 1438-48.
8	Gao R, Li D, Xun J, Zhou W, Li J, Wang J, et al. CD44ICD promotes breast cancer stemness via PFKFB4-mediated glucose metabolism. Theranostics. 2018; 8: 6248-62.
9	Li X, Liu J, Qian L, Ke H, Yao C, Tian W, et al. Expression of PFKFB3 and Ki67 in lung adenocarcinomas and targeting PFKFB3 as a therapeutic strategy. Mol Cell Biochem. 2018; 445: 123-34.
10	Takashima Y, Hayano A, Yamanaka R. Metabolome Analysis Reveals Excessive Glycolysis via PI3K/AKT/mTOR and RAS/MAPK Signaling in Methotrexate-Resistant Primary CNS Lymphoma–Derived Cells. Clinical Cancer Research. 2020; 26: 2754-66.
11	Wang X, Wahl R. Comparison of lung cancer genomic profiles for glycolysis versus proliferation radiotracers. Journal of Nuclear Medicine. 2012; 53: 18-.
12	Barclay B. TYMS Dysregulation is a Molecular Switch and Tumorigenic Driver in Early Breast Cancer; 2017.
