# Supplementary material for: A Prognostic Model of Differentiated Thyroid Cancer Based on Up-Regulated Glycolysis-Related Genes
Source: Front Endocrinol (Lausanne). 2022 Apr 22;13:775278. doi: 10.3389/fendo.2022.775278 (PMC9072639; doi:10.3389/fendo.2022.775278)
Supplement: Supplementary file 15 [file Table_5.xlsx]

## Sheet: Sheet1
Supplemental Table 5. The list of DEGs in different GRS risk
Symbol	logFC	AveExpr	t	P.Value	adj.P.Val	B	logP	express in high GRS risk group
PKNOX2	-1.98984	1.93211	-4.99039	9.61e-07	1.49e-05	5.09851	4.82782	down-regulation
CA4	-1.94061	1.59514	-4.5137	8.77e-06	8.85e-05	3.02817	4.05304	down-regulation
ZMAT4	-1.84467	-0.65932	-3.3677	0.000844	0.003669	-1.01191	2.43549	down-regulation
TFF3	-1.83864	3.65916	-3.99986	7.77e-05	0.000527	0.695345	3.27837	down-regulation
WSCD2	-1.82718	1.36688	-3.88935	0.000121	0.000751	0.578699	3.12408	down-regulation
PKHD1L1	-1.78337	2.42912	-3.36096	0.000864	0.003737	-1.38046	2.42746	down-regulation
CIB4	-1.77887	-2.61452	-4.86666	1.74e-06	2.41e-05	4.79644	4.61775	down-regulation
KCNJ13	-1.75351	-0.78069	-4.99681	9.32e-07	1.45e-05	5.32215	4.83944	down-regulation
RAG2	-1.7471	-3.3745	-3.62758	0.00033	0.001715	0.005194	2.76582	down-regulation
DIO1	-1.70994	3.52742	-3.10572	0.002057	0.007622	-2.34541	2.11792	down-regulation
LNCNEF	-1.70838	-4.50653	-4.99867	9.23e-07	1.44e-05	5.37897	4.84265	down-regulation
IRX6	-1.70639	-2.33339	-4.1028	5.11e-05	0.000373	1.65724	3.42842	down-regulation
CHRNA4	-1.65817	-1.47536	-3.97875	8.46e-05	0.000566	1.1467	3.24727	down-regulation
OCA2	-1.63987	-0.15087	-4.80003	2.37e-06	3.07e-05	4.40091	4.51268	down-regulation
LOC642484	-1.61008	-2.50535	-5.13374	4.77e-07	8.4e-06	5.99615	5.07572	down-regulation
ZNF804B	-1.59282	-2.71877	-3.2137	0.001435	0.005668	-1.35442	2.24659	down-regulation
DPP6	-1.59274	1.04238	-3.67857	0.000272	0.001467	-0.15773	2.83349	down-regulation
SLC5A8	-1.55933	1.84361	-3.21201	0.001443	0.005693	-1.79253	2.24466	down-regulation
FOXA2	-1.53896	0.225583	-4.21396	3.21e-05	0.000256	1.91599	3.59187	down-regulation
LCN8	-1.53734	-0.51901	-5.34646	1.64e-07	3.74e-06	6.94576	5.42753	down-regulation
NPY	-1.5314	-3.69653	-3.92705	0.000104	0.000666	1.05606	3.17665	down-regulation
SRRM4	-1.52812	-3.20072	-4.62296	5.37e-06	5.95e-05	3.75778	4.22547	down-regulation
GRIN2C	-1.51432	2.49927	-4.23382	2.96e-05	0.000239	1.74784	3.62073	down-regulation
CARTPT	-1.4934	-2.53858	-2.52496	0.012022	0.031892	-3.23886	1.49632	down-regulation
TPO	-1.48938	7.57708	-3.94088	9.84e-05	0.000637	0.00385	3.19575	down-regulation
CDH16	-1.48718	1.62782	-4.02489	7.02e-05	0.000485	1.03316	3.31463	down-regulation
GALNT9	-1.48329	1.90567	-6.05641	3.66e-09	1.75e-07	10.424	6.75621	down-regulation
SPHKAP	-1.47573	-5.06726	-4.40285	1.43e-05	0.000132	2.87746	3.88011	down-regulation
FLRT1	-1.45654	0.165185	-4.64047	4.96e-06	5.58e-05	3.67423	4.25298	down-regulation
SCGN	-1.45107	-3.18804	-4.14348	4.32e-05	0.000325	1.83933	3.4876	down-regulation
LINC01586	-1.44134	-1.27811	-4.26989	2.54e-05	0.000211	2.24365	3.67605	down-regulation
GABRG1	-1.4394	-2.63392	-4.15762	4.07e-05	0.00031	1.87242	3.50907	down-regulation
CLCNKA	-1.43733	0.221332	-4.17157	3.84e-05	0.000296	1.74457	3.52842	down-regulation
RGS8	-1.43224	-0.8042	-3.58136	0.000391	0.001974	-0.31755	2.70456	down-regulation
SH2D6	-1.42867	-1.00604	-5.76603	1.81e-08	6.49e-07	9.05126	6.18787	down-regulation
LCN6	-1.4189	0.886991	-3.76936	0.000193	0.001104	0.169121	2.95711	down-regulation
SEMA3D	-1.41451	1.542	-3.27697	0.001157	0.004747	-1.56411	2.32355	down-regulation
EDN3	-1.398	1.57844	-2.75713	0.006144	0.018569	-3.08144	1.7312	down-regulation
LOC101926956	-1.39407	-2.59561	-5.21809	3.14e-07	6.09e-06	6.38742	5.21535	down-regulation
LOC100129129	-1.39193	-0.86354	-3.98512	8.25e-05	0.000554	1.12082	3.25663	down-regulation
FAM189A1	-1.38446	0.937941	-4.40444	1.42e-05	0.000131	2.60527	3.88242	down-regulation
LIX1	-1.37256	1.43856	-3.91032	0.000111	0.000704	0.616938	3.15251	down-regulation
ADIG	-1.37205	-2.55035	-4.22756	3.03e-05	0.000245	2.13743	3.61097	down-regulation
MPPED2-AS1	-1.36915	-3.95903	-3.96946	8.78e-05	0.000583	1.21494	3.23446	down-regulation
SELENOV	-1.36175	-1.05173	-3.4323	0.000672	0.003054	-0.79451	2.51506	down-regulation
APOA1	-1.3576	-0.60208	-4.51955	8.55e-06	8.68e-05	3.21516	4.0617	down-regulation
HTR1E	-1.35161	-4.24901	-4.66226	4.49e-06	5.14e-05	3.93242	4.28897	down-regulation
DMRTB1	-1.34845	-4.88312	-4.00313	7.67e-05	0.000521	1.35882	3.28314	down-regulation
LCN10	-1.34004	0.647001	-4.47602	1.04e-05	0.000101	2.9279	3.99517	down-regulation
SLC5A7	-1.32171	-4.17764	-3.44724	0.000637	0.002925	-0.56136	2.53384	down-regulation
FOXJ1	-1.30666	-0.1846	-3.61849	0.000341	0.001761	-0.25258	2.75427	down-regulation
CRABP1	-1.30474	2.59824	-2.9939	0.002955	0.010199	-2.56604	1.99143	down-regulation
SOSTDC1	-1.30307	-2.24312	-3.94002	9.88e-05	0.000639	1.03532	3.19456	down-regulation
DNAH9	-1.286	-0.00504	-6.26981	1.09e-09	6.54e-08	11.7048	7.18429	down-regulation
NPAP1	-1.28391	-2.51693	-4.43172	1.26e-05	0.000119	2.94608	3.92619	down-regulation
STXBP5L	-1.27684	0.380763	-3.26919	0.001188	0.004848	-1.45959	2.31441	down-regulation
SRARP	-1.27025	-4.17505	-3.8781	0.000126	0.000779	0.891171	3.1086	down-regulation
FOXP2	-1.26589	1.65676	-5.18487	3.71e-07	6.91e-06	5.99432	5.16069	down-regulation
SLC38A3	-1.26459	1.03846	-4.95644	1.13e-06	1.7e-05	4.98778	4.77007	down-regulation
MT1G	-1.26283	4.5111	-2.54105	0.011493	0.030763	-4.14305	1.51197	down-regulation
KIT	-1.26079	3.64295	-4.51656	8.66e-06	8.76e-05	2.71588	4.05733	down-regulation
ARC	-1.25892	1.46834	-4.08254	5.55e-05	0.000399	1.25806	3.39905	down-regulation
KCNK16	-1.25726	-3.19487	-3.01513	0.002761	0.009659	-1.91809	2.01506	down-regulation
IGDCC3	-1.24883	0.568198	-4.94154	1.22e-06	1.8e-05	4.96102	4.74394	down-regulation
ZNF536	-1.24774	-2.01488	-3.19534	0.001527	0.005968	-1.46972	2.22421	down-regulation
LRP1B	-1.24401	-0.17492	-3.12842	0.001908	0.007174	-1.83075	2.14422	down-regulation
FABP4	-1.24196	1.16835	-3.3381	0.000936	0.003988	-1.33621	2.39929	down-regulation
C10orf90	-1.24067	-3.6581	-3.52282	0.000485	0.002346	-0.34255	2.62965	down-regulation
SLC26A7	-1.2348	6.46376	-4.51611	8.68e-06	8.77e-05	2.31897	4.0568	down-regulation
LOC102724719	-1.22626	-4.40298	-4.24067	2.87e-05	0.000234	2.23867	3.63132	down-regulation
PROX1-AS1	-1.22601	-1.63579	-4.17917	3.72e-05	0.000288	1.90167	3.54022	down-regulation
GRIK4	-1.2236	0.737264	-4.53511	7.97e-06	8.18e-05	3.16034	4.08708	down-regulation
FER1L6	-1.21998	-2.86154	-3.15975	0.00172	0.006587	-1.52099	2.18132	down-regulation
SHISA6	-1.21416	2.23825	-3.68685	0.000264	0.001431	-0.29695	2.8445	down-regulation
LRRC77P	-1.20375	-2.51073	-4.8834	1.6e-06	2.26e-05	4.86124	4.64629	down-regulation
SCGB3A1	-1.20262	0.148523	-4.2647	2.59e-05	0.000215	2.10566	3.66705	down-regulation
TECTB	-1.19871	-4.01029	-3.41861	0.000705	0.00317	-0.6629	2.49898	down-regulation
HAPLN2	-1.19779	-3.19363	-4.77875	2.62e-06	3.31e-05	4.41723	4.47999	down-regulation
PROSER2-AS1	-1.19036	-0.09779	-4.1526	4.15e-05	0.000315	1.68621	3.50161	down-regulation
LINC02232	-1.18639	-4.91669	-3.1892	0.001558	0.006069	-1.32521	2.21689	down-regulation
TMEFF2	-1.18389	-2.70209	-5.17813	3.83e-07	7.05e-06	6.20104	5.15184	down-regulation
CYP4F32P	-1.18075	-1.50808	-3.54761	0.000443	0.002184	-0.3879	2.66074	down-regulation
LINC00261	-1.17889	-4.26552	-3.37392	0.000826	0.003604	-0.79263	2.44325	down-regulation
LINC01539	-1.17305	-2.74292	-4.02204	7.1e-05	0.000489	1.35838	3.31061	down-regulation
PRDM16-DT	-1.1683	2.42854	-6.21306	1.51e-09	8.51e-08	11.2182	7.07006	down-regulation
TFF2	-1.16698	-4.84683	-3.48672	0.000553	0.002614	-0.41247	2.58269	down-regulation
TBX2-AS1	-1.16264	-0.34413	-4.67449	4.24e-06	4.91e-05	3.84702	4.30869	down-regulation
MPPED2	-1.14807	2.4066	-3.93527	0.000101	0.000649	0.577232	3.18756	down-regulation
COL9A3	-1.14481	2.45611	-3.00521	0.00285	0.009907	-2.52613	2.00406	down-regulation
SFTPC	-1.14209	-1.86004	-3.39094	0.000778	0.003433	-0.87664	2.46434	down-regulation
RIMS4	-1.14001	1.99505	-3.82273	0.000157	0.000926	0.214934	3.03329	down-regulation
GALNT17	-1.13848	3.31137	-4.43368	1.25e-05	0.000118	2.41199	3.9294	down-regulation
HHATL-AS1	-1.137	-3.94779	-4.28045	2.42e-05	0.000203	2.38295	3.69226	down-regulation
OR6R1P	-1.13308	-4.74422	-3.86453	0.000133	0.000813	0.85673	3.09016	down-regulation
LINC01933	-1.13275	-2.64401	-3.68372	0.000267	0.001446	0.142557	2.83976	down-regulation
ZDHHC22	-1.12807	-4.63673	-4.06139	6.05e-05	0.000428	1.5655	3.36832	down-regulation
TBX22	-1.12789	-3.14959	-2.99442	0.00295	0.01019	-1.98438	1.99182	down-regulation
ASXL3	-1.12318	-1.07362	-3.56144	0.000421	0.002097	-0.37719	2.67835	down-regulation
HSD11B2	-1.12218	2.20137	-5.45223	9.54e-08	2.46e-06	7.23377	5.60968	down-regulation
AGR3	-1.12003	-2.5315	-3.41795	0.000707	0.003175	-0.74733	2.49829	down-regulation
NCAPGP2	-1.11779	-5.47768	-4.45789	1.12e-05	0.000108	3.09522	3.9669	down-regulation
MROH2A	-1.11161	-2.61284	-2.39205	0.017294	0.042697	-3.56182	1.3696	down-regulation
LINC02608	-1.11097	-4.03604	-4.29187	2.31e-05	0.000196	2.42915	3.70831	down-regulation
NAT16	-1.10819	-1.40416	-3.05304	0.002443	0.008747	-1.94397	2.05812	down-regulation
CNTN3	-1.10505	0.085913	-3.97125	8.72e-05	0.000579	0.972096	3.23712	down-regulation
LINC01014	-1.10358	-5.64592	-4.18684	3.6e-05	0.000281	2.0447	3.55199	down-regulation
AQP7	-1.10242	-0.29319	-5.05742	6.94e-07	1.14e-05	5.55226	4.94142	down-regulation
ABCC8	-1.1015	0.721708	-2.87554	0.004286	0.013837	-2.67437	1.85896	down-regulation
GGTLC2	-1.0996	-2.11759	-3.92565	0.000105	0.000668	0.969988	3.17498	down-regulation
PPP1R42	-1.09855	-1.71729	-6.26322	1.13e-09	6.75e-08	11.6924	7.17061	down-regulation
CASP12	-1.09641	-1.65728	-5.59679	4.48e-08	1.32e-06	8.20373	5.88	down-regulation
LOC101927855	-1.09411	-4.71207	-3.88516	0.000123	0.000761	0.928374	3.11878	down-regulation
EPPIN	-1.08998	-4.69742	-3.89531	0.000118	0.000738	0.964018	3.1321	down-regulation
LINC02593	-1.08822	1.88051	-4.57413	6.69e-06	7.13e-05	3.19974	4.14667	down-regulation
TDRD9	-1.0873	1.92933	-3.73959	0.000216	0.001214	-0.08063	2.91565	down-regulation
AADACP1	-1.08612	-2.79068	-3.9288	0.000103	0.000663	1.01533	3.17878	down-regulation
ODF3L1	-1.08426	-1.24094	-4.45842	1.12e-05	0.000108	2.9913	3.96716	down-regulation
AGTR1	-1.08376	-0.51653	-3.36989	0.000838	0.003647	-1.0567	2.43802	down-regulation
ELAVL3	-1.08255	-4.09447	-4.55393	7.33e-06	7.68e-05	3.48058	4.11446	down-regulation
SPX	-1.08081	1.95974	-4.19889	3.42e-05	0.000269	1.64458	3.56971	down-regulation
CRYBB3	-1.07451	-1.1915	-6.62784	1.33e-10	1.14e-08	13.7377	7.94332	down-regulation
ETNPPL	-1.07171	-3.07685	-2.95573	0.003336	0.011302	-2.09974	1.94685	down-regulation
C1QTNF9B	-1.06731	-3.15985	-5.53099	6.33e-08	1.75e-06	7.88557	5.75582	down-regulation
APOA4	-1.06182	-5.47329	-3.21266	0.00144	0.005682	-1.2366	2.24552	down-regulation
NOX5	-1.05954	0.678284	-3.23072	0.001355	0.005408	-1.62975	2.26698	down-regulation
LOC105379194	-1.0582	-1.93128	-3.29989	0.001069	0.004461	-1.16228	2.35061	down-regulation
ODAM	-1.05495	-3.74532	-2.55734	0.010978	0.029659	-3.09221	1.52784	down-regulation
TRPV6	-1.05394	0.68137	-4.40088	1.44e-05	0.000132	2.59633	3.87783	down-regulation
HMGCS2	-1.05234	-4.55638	-3.00305	0.00287	0.009966	-1.88068	2.00146	down-regulation
CLCNKB	-1.05041	1.98151	-5.22581	3.02e-07	5.92e-06	6.14552	5.22755	down-regulation
MSI1	-1.04974	-0.29122	-3.6056	0.000358	0.001832	-0.30091	2.73708	down-regulation
EYA4	-1.04891	-0.07675	-3.24802	0.001277	0.005152	-1.48975	2.28802	down-regulation
AMBP	-1.0436	-3.53798	-4.47971	1.02e-05	9.99e-05	3.16695	4.00028	down-regulation
HSPB7	-1.04295	2.36913	-3.7273	0.000226	0.001262	-0.18497	2.89896	down-regulation
FHAD1-AS1	-1.04262	-2.01547	-3.4884	0.000549	0.002602	-0.55434	2.58466	down-regulation
PWRN1	-1.04091	-0.68984	-3.19138	0.001547	0.006032	-1.59947	2.21952	down-regulation
LRRTM1	-1.03988	-0.96495	-2.56476	0.01075	0.029198	-3.29902	1.53464	down-regulation
TCEAL6	-1.03808	-4.49315	-4.40426	1.42e-05	0.000131	2.87884	3.8823	down-regulation
FHL1	-1.03607	6.85475	-5.30659	2.01e-07	4.37e-06	5.93542	5.35983	down-regulation
TRHR	-1.02871	-3.61988	-3.10616	0.002054	0.007613	-1.63881	2.11845	down-regulation
PRMT8	-1.02824	0.361654	-2.34193	0.019757	0.047466	-3.98245	1.32362	down-regulation
KCNAB1	-1.02754	4.27307	-3.53008	0.000472	0.0023	-1.21007	2.63826	down-regulation
PPY	-1.02651	-5.25445	-3.16653	0.001681	0.006464	-1.38155	2.18952	down-regulation
BTBD11	-1.02406	4.18381	-5.32169	1.86e-07	4.12e-06	6.2793	5.38488	down-regulation
TFF1	-1.02081	-4.75242	-3.30105	0.001065	0.004449	-1.0005	2.35176	down-regulation
CWH43	-1.02063	0.5253	-3.00485	0.002853	0.009917	-2.29095	2.00364	down-regulation
FOSB	-1.01817	6.62151	-3.53918	0.000457	0.002242	-1.44546	2.64942	down-regulation
MT1F	-1.01566	5.15627	-3.59411	0.000373	0.001897	-1.14734	2.72195	down-regulation
WNT11	-1.01432	-0.27325	-4.53454	7.99e-06	8.2e-05	3.23786	4.08621	down-regulation
CECR2	-1.01202	-0.40176	-4.32896	1.97e-05	0.000172	2.40208	3.76512	down-regulation
APOC1P1	-1.0118	-2.35641	-3.06675	0.002336	0.008441	-1.83548	2.0736	down-regulation
BMP8A	-1.01088	0.345969	-3.17011	0.001661	0.006399	-1.78025	2.1939	down-regulation
DNAAF1	-1.008	0.70767	-5.65829	3.23e-08	1.01e-06	8.40027	5.99543	down-regulation
LINC02028	-1.00773	-0.71558	-5.68936	2.74e-08	8.94e-07	8.64317	6.04877	down-regulation
KCNK17	-1.00734	0.405419	-3.53761	0.000459	0.002249	-0.60934	2.64798	down-regulation
LINC01976	-1.00619	-4.92692	-3.75268	0.000205	0.001165	0.470244	2.93358	down-regulation
CYP2W1	-1.00566	-2.22012	-3.21589	0.001424	0.005634	-1.40236	2.24916	down-regulation
TEKT1	-1.0026	-4.61921	-3.97884	8.46e-05	0.000566	1.26106	3.24727	down-regulation
C1QL4	-1.00243	1.31587	-4.26172	2.63e-05	0.000217	1.96246	3.6629	down-regulation
CCL13	1.00021	0.766721	3.38842	0.000785	0.00346	-1.27661	2.4609	up-regulation
CDC45	1.00174	0.891671	10.1899	1.8e-21	5.13e-19	38.0583	18.2897	up-regulation
TRBV19	1.00235	-2.50343	4.37093	1.64e-05	0.000148	2.64032	3.82893	up-regulation
IGHV3-6	1.00318	-5.74619	4.86462	1.75e-06	2.43e-05	4.79489	4.61485	up-regulation
SPC25	1.00328	-0.77834	10.1761	2e-21	5.63e-19	37.8789	18.2493	up-regulation
MMP3	1.00358	-4.83274	3.55723	0.000428	0.002124	-0.2332	2.67281	up-regulation
ADAM12	1.00382	1.66993	5.14325	4.55e-07	8.1e-06	5.64888	5.09158	up-regulation
CD6	1.00677	1.96429	6.43152	4.25e-10	3.04e-08	12.3577	7.51771	up-regulation
GREM1	1.00681	0.408472	3.69206	0.000259	0.00141	-0.20522	2.85091	up-regulation
PTPN22	1.00722	0.814165	6.37156	6.04e-10	4.08e-08	12.143	7.38975	up-regulation
MEI1	1.00938	0.430663	5.39699	1.27e-07	3.03e-06	7.01889	5.51796	up-regulation
EXO1	1.01093	-0.37872	11.5454	2.89e-26	2.34e-23	48.7837	22.6316	up-regulation
CD40LG	1.01103	-1.2403	5.25508	2.61e-07	5.29e-06	6.46504	5.27688	up-regulation
IGHV3-65	1.01163	-5.90777	5.19858	3.46e-07	6.58e-06	6.28303	5.18205	up-regulation
TRAF3IP3	1.01262	1.45215	6.37875	5.79e-10	3.94e-08	12.1201	7.40479	up-regulation
LINC00861	1.01357	-0.52654	5.58051	4.88e-08	1.41e-06	8.01368	5.85022	up-regulation
NLRP4	1.01371	-5.2798	4.56046	7.12e-06	7.5e-05	3.50758	4.12496	up-regulation
KRT16	1.01437	-2.53174	2.78454	0.005658	0.017357	-2.6952	1.76053	up-regulation
NUF2	1.01453	0.051949	10.3265	6.09e-22	1.82e-19	39.0956	18.739	up-regulation
MYBPH	1.01457	-0.43307	3.46795	0.000591	0.002757	-0.87361	2.55959	up-regulation
LAMB3	1.01606	6.49845	3.48294	0.00056	0.00264	-1.62681	2.57832	up-regulation
TRBV12-4	1.01614	-4.34671	4.65316	4.68e-06	5.33e-05	3.87908	4.27353	up-regulation
BHLHA15	1.0163	-2.72426	4.25934	2.65e-05	0.000219	2.20675	3.65927	up-regulation
DUSP13	1.01639	-1.3696	3.87047	0.00013	0.000797	0.626702	3.09858	up-regulation
SNX20	1.01661	1.60786	5.98081	5.59e-09	2.46e-07	9.90268	6.60932	up-regulation
CSF2	1.01695	-0.72574	3.83594	0.000149	0.000888	0.434997	3.05173	up-regulation
LIPM	1.01827	-3.40462	4.67237	4.29e-06	4.95e-05	3.93411	4.30529	up-regulation
CD2	1.01844	2.4039	5.14712	4.47e-07	7.98e-06	5.54903	5.09823	up-regulation
JAKMIP2	1.02055	-2.12059	5.68387	2.82e-08	9.11e-07	8.62495	6.04059	up-regulation
ESPL1	1.0206	0.218749	11.0142	2.36e-24	1.18e-21	44.5367	20.9266	up-regulation
PARP15	1.02284	0.550676	5.90611	8.45e-09	3.44e-07	9.61449	6.46352	up-regulation
TRBV6-1	1.02285	-3.72225	4.87496	1.67e-06	2.34e-05	4.8231	4.63122	up-regulation
ASPHD1	1.02319	0.829083	4.87419	1.67e-06	2.34e-05	4.50727	4.62996	up-regulation
SLCO5A1	1.02495	-2.23479	5.25859	2.56e-07	5.21e-06	6.53653	5.28358	up-regulation
BIRC3	1.02584	3.80875	5.2995	2.08e-07	4.5e-06	6.03799	5.34677	up-regulation
S100B	1.02653	1.40864	3.58403	0.000387	0.001958	-0.71418	2.70826	up-regulation
IKZF1	1.0279	2.47631	6.42119	4.52e-10	3.2e-08	12.2203	7.49472	up-regulation
TNC	1.02866	6.03467	4.24904	2.77e-05	0.000227	1.20375	3.6441	up-regulation
LOC283710	1.02884	-1.05098	5.3867	1.34e-07	3.18e-06	7.08803	5.49783	up-regulation
CYP1B1	1.03003	5.50775	3.8375	0.000148	0.000884	-0.38459	3.05355	up-regulation
TAGAP	1.03028	2.01298	7.77443	8.97e-14	1.19e-11	20.6143	10.9247	up-regulation
LOC107986412	1.03081	-3.68375	5.43417	1.05e-07	2.62e-06	7.41398	5.5816	up-regulation
CD3E	1.03192	2.70937	5.27067	2.41e-07	4.99e-06	6.08715	5.30184	up-regulation
TRBV29-1	1.03225	-2.84531	4.76396	2.81e-06	3.51e-05	4.30729	4.45509	up-regulation
MUC1	1.033	5.95404	4.06277	6.02e-05	0.000427	0.466023	3.37003	up-regulation
MIR8071-2	1.03533	-4.66147	3.70642	0.000245	0.001347	0.260352	2.87056	up-regulation
IGLVI-70	1.03822	-5.17735	3.84845	0.000142	0.000855	0.776435	3.06797	up-regulation
LAIR2	1.0387	-2.90047	5.04261	7.46e-07	1.21e-05	5.55336	4.91696	up-regulation
CD3D	1.03886	1.1018	4.96092	1.11e-06	1.67e-05	4.86864	4.77681	up-regulation
CLCA2	1.03967	-2.56731	3.20063	0.0015	0.005877	-1.50751	2.23084	up-regulation
PMAIP1	1.0413	2.16822	6.4011	5.08e-10	3.55e-08	12.1535	7.45021	up-regulation
WDFY4	1.0419	2.83593	7.13124	5.95e-12	6.7e-10	16.3901	9.17422	up-regulation
KERA	1.04232	-5.59474	4.77516	2.67e-06	3.36e-05	4.4103	4.47416	up-regulation
IL2RG	1.04363	3.356	5.2943	2.14e-07	4.58e-06	6.08548	5.33936	up-regulation
HLA-DQA1	1.04366	5.44526	5.16758	4.04e-07	7.36e-06	5.26546	5.1334	up-regulation
LSAMP	1.04444	0.361866	5.31555	1.92e-07	4.22e-06	6.62518	5.37446	up-regulation
CCL7	1.04588	-3.83184	3.89047	0.00012	0.000749	0.869525	3.12541	up-regulation
LOC643709	1.04626	-2.73842	3.39889	0.000756	0.003354	-0.87495	2.47447	up-regulation
IL22RA2	1.04731	-3.47071	3.38984	0.000781	0.003444	-0.8539	2.46297	up-regulation
LINC00494	1.04769	-4.69131	4.28454	2.38e-05	0.000201	2.38687	3.69756	up-regulation
TRBC2	1.0477	2.6776	5.10515	5.5e-07	9.45e-06	5.29746	5.0244	up-regulation
GPR18	1.04774	-1.70384	6.27591	1.05e-09	6.38e-08	11.7506	7.19534	up-regulation
NPHS1	1.04927	-4.91629	4.06051	6.07e-05	0.000429	1.5377	3.36752	up-regulation
DRP2	1.0517	-4.01548	4.57981	6.53e-06	6.96e-05	3.56229	4.15728	up-regulation
ETV7	1.05176	1.79164	6.78035	5.27e-11	5.04e-09	14.4104	8.29751	up-regulation
IGHV3-42	1.05214	-5.67045	4.90862	1.42e-06	2.05e-05	4.98747	4.68901	up-regulation
ROS1	1.0526	-4.6467	3.36775	0.000844	0.003669	-0.85456	2.43549	up-regulation
CR1L	1.05437	-4.23736	5.0964	5.74e-07	9.79e-06	5.82719	5.00931	up-regulation
SIT1	1.05464	-0.21514	5.54332	5.94e-08	1.65e-06	7.8007	5.78126	up-regulation
IGLV1-50	1.05681	-3.97838	3.70078	0.00025	0.001369	0.206994	2.86358	up-regulation
LHX2	1.05747	-4.14754	3.64863	0.000305	0.001607	0.037998	2.79385	up-regulation
ARSI	1.0591	-1.1497	3.97024	8.75e-05	0.000581	0.970651	3.23555	up-regulation
CHRM3-AS2	1.05983	-3.22946	5.02641	8.07e-07	1.28e-05	5.48899	4.89143	up-regulation
TMPRSS4	1.06054	4.45578	2.96438	0.003246	0.011053	-3.2014	1.95652	up-regulation
BLK	1.06081	-1.53861	3.83781	0.000148	0.000883	0.520171	3.05394	up-regulation
ARNTL2	1.06118	1.91523	7.8302	6.16e-14	8.23e-12	20.9911	11.0846	up-regulation
KRT6A	1.06193	-1.58211	2.47879	0.013664	0.035299	-3.56929	1.45224	up-regulation
UBASH3A	1.06258	-0.5812	5.68776	2.76e-08	8.96e-07	8.56151	6.04752	up-regulation
GZMK	1.06374	0.081008	4.33049	1.96e-05	0.000171	2.24989	3.76777	up-regulation
THEMIS	1.06433	-0.76638	5.86058	1.08e-08	4.23e-07	9.47062	6.37363	up-regulation
SLITRK6	1.06537	-2.76949	2.99399	0.002954	0.010198	-2.10033	1.99148	up-regulation
ASF1B	1.06791	2.67759	11.4097	8.99e-26	6.67e-23	47.7593	22.1756	up-regulation
EGFL6	1.06828	-0.98289	5.35253	1.59e-07	3.64e-06	6.91529	5.43939	up-regulation
TRAC	1.06848	3.09573	5.27364	2.38e-07	4.95e-06	6.02829	5.30497	up-regulation
E2F2	1.07035	0.46454	10.4889	1.67e-22	5.73e-20	40.3807	19.2416	up-regulation
CD1B	1.07168	-2.38773	3.6268	0.000331	0.001719	-0.14798	2.76479	up-regulation
ANLN	1.07257	1.26394	9.0342	1.23e-17	2.29e-15	29.3861	14.6398	up-regulation
ADAMTS14	1.07279	1.15549	4.5097	8.93e-06	8.98e-05	2.86869	4.04668	up-regulation
TRBV7-9	1.07353	-2.64882	4.96043	1.11e-06	1.67e-05	5.16983	4.77656	up-regulation
SAMSN1	1.07551	1.22263	6.58529	1.71e-10	1.39e-08	13.3253	7.85615	up-regulation
CEP55	1.07848	0.9395	11.8727	1.84e-27	1.8e-24	51.5999	23.7454	up-regulation
CENPE	1.07867	0.59676	10.8573	8.51e-24	3.76e-21	43.3017	20.4249	up-regulation
AURKB	1.07881	0.369744	8.95985	2.13e-17	3.77e-15	28.8748	14.4232	up-regulation
CD3G	1.07907	0.43175	5.68575	2.79e-08	9.03e-07	8.47002	6.04419	up-regulation
CARMIL2	1.07914	0.226796	6.0378	4.07e-09	1.88e-07	10.3439	6.72478	up-regulation
ZNF831	1.07935	-0.72804	5.60602	4.27e-08	1.27e-06	8.15468	5.89774	up-regulation
TRBV4-2	1.0805	-3.75055	4.76199	2.83e-06	3.53e-05	4.32897	4.45227	up-regulation
HMGA2	1.08075	4.81069	4.10198	5.12e-05	0.000374	0.643745	3.42731	up-regulation
IFNG	1.0812	-3.30195	4.20167	3.38e-05	0.000267	2.00915	3.57369	up-regulation
CLDN10	1.08505	1.96286	2.47882	0.013663	0.035299	-4.05538	1.45224	up-regulation
LINC00582	1.08662	-4.60685	4.56066	7.11e-06	7.5e-05	3.49697	4.1251	up-regulation
SCN1A	1.0882	-5.08685	4.88579	1.59e-06	2.24e-05	4.889	4.65021	up-regulation
IL37	1.08869	-5.0238	3.82511	0.000155	0.00092	0.687464	3.03619	up-regulation
TPX2	1.08961	2.24966	11.6571	1.13e-26	1e-23	49.8263	22.999	up-regulation
ERMN	1.09044	-2.74108	6.23532	1.33e-09	7.72e-08	11.5405	7.11225	up-regulation
TRBV18	1.09055	-4.05808	4.88501	1.59e-06	2.24e-05	4.87401	4.64907	up-regulation
CXCL17	1.09067	2.32515	3.69647	0.000254	0.001389	-0.48163	2.85727	up-regulation
GPR87	1.09183	-2.48886	3.61405	0.000347	0.001787	-0.1843	2.74782	up-regulation
FLT3	1.09209	-1.70808	5.69865	2.61e-08	8.56e-07	8.68257	6.06732	up-regulation
SFN	1.09325	3.55748	3.77563	0.000188	0.001083	-0.43261	2.96531	up-regulation
NPFFR2	1.09327	-1.84357	3.94203	9.8e-05	0.000635	0.928358	3.19708	up-regulation
OR13A1	1.09394	-3.05604	4.2922	2.31e-05	0.000196	2.3522	3.70872	up-regulation
RHOH	1.09475	0.997182	5.8962	8.92e-09	3.59e-07	9.51519	6.44458	up-regulation
BIRC5	1.0953	1.0985	9.76945	4.78e-20	1.1e-17	34.8376	16.9601	up-regulation
IL4I1	1.09702	1.51579	5.40588	1.21e-07	2.94e-06	6.93695	5.53103	up-regulation
DEPDC1B	1.09711	2.3625	4.96086	1.11e-06	1.67e-05	4.67814	4.77681	up-regulation
CCL22	1.0992	0.953241	4.18339	3.65e-05	0.000284	1.55833	3.54673	up-regulation
CD180	1.10694	0.979172	6.69446	8.88e-11	7.92e-09	13.9839	8.10121	up-regulation
LTB	1.10828	2.07259	4.72272	3.4e-06	4.08e-05	3.64981	4.38929	up-regulation
SKA3	1.10913	-0.51234	11.5193	3.6e-26	2.78e-23	48.5601	22.5553	up-regulation
GPR25	1.10944	-4.20744	4.90786	1.43e-06	2.05e-05	4.97765	4.68778	up-regulation
CCL20	1.1096	-0.47912	3.91514	0.000109	0.000693	0.69367	3.15955	up-regulation
TMPRSS6	1.10982	3.79852	2.72083	0.006844	0.020252	-3.79341	1.69354	up-regulation
PBK	1.11077	-0.20696	8.97631	1.89e-17	3.41e-15	28.993	14.4674	up-regulation
HJURP	1.11372	-0.03514	10.2381	1.23e-21	3.62e-19	38.409	18.4416	up-regulation
CHGB	1.11509	2.03938	4.07467	5.73e-05	0.000409	0.969526	3.38835	up-regulation
TNFRSF9	1.11517	-0.05742	5.41904	1.13e-07	2.8e-06	7.16623	5.55354	up-regulation
ICAM3	1.1162	-0.20819	6.88756	2.73e-11	2.74e-09	15.2081	8.56261	up-regulation
TRAV13-1	1.11736	-3.56155	4.99528	9.38e-07	1.45e-05	5.35561	4.83735	up-regulation
SIGLEC12	1.11796	-2.69244	4.22009	3.13e-05	0.000251	2.04765	3.60027	up-regulation
IGHV1-17	1.11824	-5.52086	4.84959	1.88e-06	2.56e-05	4.7312	4.5911	up-regulation
SGO1	1.11861	-1.0048	12.6106	3.3e-30	5.57e-27	57.5325	26.2542	up-regulation
TRAV19	1.11932	-3.11086	5.57262	5.09e-08	1.46e-06	8.08694	5.83687	up-regulation
TRAV12-1	1.11947	-4.19118	5.07053	6.51e-07	1.09e-05	5.70826	4.96377	up-regulation
CENPA	1.1197	-1.26788	9.82717	3.06e-20	7.29e-18	35.1887	17.1375	up-regulation
MCM10	1.12023	0.032189	11.0025	2.6e-24	1.24e-21	44.433	20.9076	up-regulation
DEPDC1	1.12283	-0.72462	9.74406	5.82e-20	1.29e-17	34.6086	16.89	up-regulation
DIAPH3	1.12458	-0.3153	9.73951	6.03e-20	1.32e-17	34.5958	16.8807	up-regulation
TRBV7-6	1.12548	-4.44959	5.65294	3.33e-08	1.03e-06	8.48717	5.98572	up-regulation
PTPN7	1.13132	1.94214	6.43396	4.19e-10	3.01e-08	12.3651	7.52119	up-regulation
LYZ	1.13277	5.47675	4.65044	4.74e-06	5.38e-05	2.89382	4.26902	up-regulation
IGHV3-22	1.13316	-5.54558	5.11946	5.12e-07	8.92e-06	5.92984	5.04966	up-regulation
TRBV11-2	1.13923	-3.95463	5.33319	1.76e-07	3.93e-06	6.93024	5.40507	up-regulation
COL6A5	1.13933	-4.0365	3.69074	0.00026	0.001415	0.173237	2.84912	up-regulation
UBE2C	1.13946	0.930116	9.18329	4.09e-18	7.74e-16	30.4809	15.1113	up-regulation
LCP1	1.14051	5.84034	6.42769	4.35e-10	3.09e-08	11.9121	7.50961	up-regulation
ANKRD22	1.14092	0.356636	5.35703	1.56e-07	3.56e-06	6.82375	5.44827	up-regulation
CD5	1.14112	1.20043	5.99604	5.13e-09	2.28e-07	10.025	6.64199	up-regulation
RNF225	1.14279	-2.1873	4.65767	4.58e-06	5.23e-05	3.81204	4.28148	up-regulation
CD1E	1.14365	0.189243	4.18284	3.66e-05	0.000284	1.64333	3.54635	up-regulation
GALNT5	1.14535	0.762417	4.49349	9.6e-06	9.53e-05	2.84479	4.02095	up-regulation
SDR16C5	1.14722	-1.30305	3.43782	0.000659	0.003005	-0.88472	2.52211	up-regulation
DTL	1.14982	1.7682	10.8841	6.84e-24	3.1e-21	43.5266	20.5093	up-regulation
CD28	1.15079	0.026523	6.17546	1.87e-09	1.01e-07	11.1063	6.99569	up-regulation
HLA-DOB	1.15125	1.52881	6.1773	1.85e-09	1e-07	10.9754	6.99823	up-regulation
CLEC17A	1.15194	-3.138	5.06731	6.61e-07	1.1e-05	5.67186	4.95883	up-regulation
CD1A	1.15396	0.249488	3.11676	0.001983	0.007389	-2.07143	2.13144	up-regulation
IL7R	1.15407	2.57294	5.42002	1.13e-07	2.79e-06	6.8354	5.55457	up-regulation
LINC02422	1.15948	-5.06888	5.22939	2.97e-07	5.86e-06	6.44059	5.23212	up-regulation
LY9	1.16142	-0.10943	5.50906	7.1e-08	1.94e-06	7.61618	5.71185	up-regulation
RUFY4	1.16182	-2.6337	5.29663	2.12e-07	4.54e-06	6.72999	5.34279	up-regulation
XKR4	1.16301	-1.66894	4.15693	4.08e-05	0.00031	1.72494	3.50801	up-regulation
IGHV1-14	1.16398	-5.27075	4.46814	1.07e-05	0.000104	3.12945	3.98172	up-regulation
LINC00402	1.16446	-5.01634	5.05248	7.11e-07	1.17e-05	5.63047	4.93364	up-regulation
SLAMF1	1.16475	0.136628	5.56237	5.37e-08	1.52e-06	7.86332	5.81678	up-regulation
NEIL3	1.16555	-2.18284	8.27875	2.83e-15	4.23e-13	24.0646	12.3736	up-regulation
MMP13	1.16593	-3.34196	2.66531	0.008056	0.023137	-2.94484	1.63569	up-regulation
NUSAP1	1.16634	2.15399	14.1059	6.14e-36	1.14e-31	70.904	30.9435	up-regulation
E2F7	1.16957	-0.74905	10.3636	4.53e-22	1.38e-19	39.3351	18.8604	up-regulation
SLC28A3	1.1699	0.293316	5.44987	9.66e-08	2.48e-06	7.28598	5.60497	up-regulation
SEZ6L2	1.17258	4.40065	5.40496	1.22e-07	2.95e-06	6.47896	5.5301	up-regulation
TREML2	1.17308	-2.39847	6.21199	1.52e-09	8.54e-08	11.4113	7.06872	up-regulation
LINC01281	1.17312	-4.49598	4.78995	2.49e-06	3.19e-05	4.46533	4.49674	up-regulation
NEK2	1.17366	-0.35521	10.0467	5.54e-21	1.43e-18	36.9233	17.8452	up-regulation
CCR8	1.17687	-2.94949	5.15757	4.24e-07	7.63e-06	6.08336	5.11733	up-regulation
TNIP3	1.17714	-2.92074	6.61127	1.46e-10	1.23e-08	13.6376	7.91186	up-regulation
SLC22A31	1.17752	4.50554	3.36882	0.000841	0.003658	-1.96484	2.4368	up-regulation
BTLA	1.17802	-1.22922	5.78573	1.63e-08	5.99e-07	9.10412	6.2223	up-regulation
MCEMP1	1.17973	-0.90068	3.77254	0.00019	0.001093	0.216452	2.96147	up-regulation
IGLV2-33	1.18019	-5.40717	4.93961	1.23e-06	1.82e-05	5.1256	4.74096	up-regulation
CIBAR2	1.18111	-4.49302	4.49181	9.67e-06	9.58e-05	3.20959	4.0187	up-regulation
SH2D1A	1.18371	-0.38673	5.80222	1.49e-08	5.55e-07	9.13523	6.25596	up-regulation
TRBV4-1	1.184	-3.99285	5.137	4.7e-07	8.3e-06	6.01024	5.08093	up-regulation
SP140	1.18659	0.569953	6.86155	3.2e-11	3.15e-09	15.0035	8.50228	up-regulation
SHCBP1	1.19331	0.553692	12.7396	1.08e-30	2.22e-27	58.8805	26.6531	up-regulation
TRBV5-1	1.19561	-2.70224	5.27603	2.35e-07	4.92e-06	6.63339	5.30773	up-regulation
PTPRC	1.19647	4.09875	6.76423	5.81e-11	5.45e-09	13.9632	8.26367	up-regulation
CENPF	1.19856	2.18311	11.345	1.54e-25	1.1e-22	47.252	21.959	up-regulation
IGHV7-27	1.19909	-5.37014	4.83408	2.02e-06	2.7e-05	4.6641	4.56815	up-regulation
ITK	1.20357	0.904716	6.19585	1.66e-09	9.17e-08	11.143	7.03777	up-regulation
KIF18B	1.20427	-0.137	11.2167	4.46e-25	2.59e-22	46.1472	21.5874	up-regulation
BRIP1	1.20505	0.278112	11.5929	1.94e-26	1.64e-23	49.2465	22.7851	up-regulation
NCAPH	1.20696	0.453331	12.835	4.7e-31	1.25e-27	59.6848	26.9047	up-regulation
TRBC1	1.20758	-2.68708	5.91087	8.23e-09	3.36e-07	9.80589	6.47395	up-regulation
CLDN16	1.20822	5.49841	3.96054	9.1e-05	0.000599	0.076578	3.2227	up-regulation
TFPI2	1.21466	-0.22688	6.15935	2.05e-09	1.1e-07	11.0333	6.95894	up-regulation
GBP5	1.21646	2.08926	6.08875	3.05e-09	1.53e-07	10.4065	6.81663	up-regulation
SFTPB	1.21713	7.70856	2.55126	0.011168	0.030046	-4.31699	1.52221	up-regulation
PRAMENP	1.2177	-5.34766	5.26709	2.46e-07	5.05e-06	6.61319	5.29692	up-regulation
SLAMF6	1.21964	0.754029	5.85891	1.09e-08	4.26e-07	9.3357	6.37059	up-regulation
VTCN1	1.21999	-0.31921	2.91914	0.003742	0.012412	-2.58171	1.90614	up-regulation
IGKV1D-33	1.22301	-5.53265	4.86472	1.75e-06	2.43e-05	4.79704	4.61485	up-regulation
IGHJ1	1.22307	-5.1056	4.56393	7.01e-06	7.41e-05	3.51822	4.13007	up-regulation
SLC34A2	1.22308	9.80914	3.04075	0.002542	0.009027	-2.86666	2.04448	up-regulation
XCR1	1.22361	-1.71993	5.05532	7.01e-07	1.15e-05	5.55005	4.93837	up-regulation
IGHV3-76	1.22793	-5.28954	4.76721	2.77e-06	3.47e-05	4.37557	4.45999	up-regulation
AIM2	1.22868	-1.42851	5.63681	3.62e-08	1.11e-06	8.35004	5.95599	up-regulation
CKAP2L	1.22983	-0.35664	11.247	3.47e-25	2.08e-22	46.3728	21.6824	up-regulation
ESCO2	1.23104	-0.72269	11.1886	5.62e-25	3.07e-22	45.8611	21.5128	up-regulation
LOC105369187	1.23731	0.405559	5.27098	2.41e-07	4.99e-06	6.39663	5.30184	up-regulation
SIRPG	1.24144	-0.39446	5.43706	1.03e-07	2.59e-06	7.27813	5.58632	up-regulation
TRAV12-2	1.24312	-3.62749	5.75833	1.89e-08	6.68e-07	9.02434	6.17538	up-regulation
IGHV3-25	1.24341	-5.51655	5.29266	2.16e-07	4.6e-06	6.72998	5.33728	up-regulation
TRBV2	1.24342	-3.97045	5.9334	7.27e-09	3.03e-07	9.92316	6.51828	up-regulation
TRBV3-1	1.24349	-3.92956	5.97997	5.61e-09	2.46e-07	10.1669	6.60833	up-regulation
TERT	1.24675	-5.77115	5.77296	1.75e-08	6.34e-07	9.05041	6.19823	up-regulation
UHRF1	1.25286	1.23037	12.0339	4.68e-28	5.11e-25	52.9642	24.2915	up-regulation
TRBV15	1.25351	-4.85496	5.84099	1.21e-08	4.6e-07	9.42851	6.33706	up-regulation
CDCA7	1.25358	0.603228	9.86998	2.2e-20	5.37e-18	35.6035	17.2703	up-regulation
SFRP2	1.25439	3.55301	3.16972	0.001663	0.006404	-2.47341	2.19353	up-regulation
TMEM92	1.2548	0.621213	3.55901	0.000425	0.002113	-0.70687	2.67506	up-regulation
STYK1	1.25518	-1.46055	7.41072	9.91e-13	1.2e-10	18.4428	9.92072	up-regulation
L1CAM	1.25714	0.230567	6.10877	2.73e-09	1.39e-07	10.7222	6.85768	up-regulation
NCAPG	1.25848	0.344221	12.3687	2.66e-29	3.8e-26	55.7159	25.4197	up-regulation
CRACD	1.25909	-1.44016	6.48408	3.12e-10	2.33e-08	12.9049	7.63334	up-regulation
TRAV4	1.26018	-3.9295	5.85768	1.1e-08	4.27e-07	9.53167	6.36947	up-regulation
SLAMF7	1.2627	2.06606	5.27078	2.41e-07	4.99e-06	6.17892	5.30184	up-regulation
HLA-DOA	1.26293	4.4482	6.14044	2.28e-09	1.19e-07	10.3401	6.9247	up-regulation
HASPIN	1.26311	-1.63537	10.8037	1.32e-23	5.46e-21	42.6688	20.2625	up-regulation
TLR10	1.26373	-0.52571	6.49007	3.01e-10	2.27e-08	12.8995	7.64345	up-regulation
TIGIT	1.26493	0.987896	5.7717	1.76e-08	6.35e-07	8.85068	6.19697	up-regulation
E2F8	1.26662	-1.0056	10.4643	2.03e-22	6.63e-20	40.0963	19.1786	up-regulation
LCN2	1.26664	3.89486	4.22467	3.07e-05	0.000247	1.21846	3.60661	up-regulation
TRAT1	1.26696	-1.84294	5.49338	7.71e-08	2.08e-06	7.6521	5.68144	up-regulation
DLGAP5	1.26841	0.276395	11.2043	4.94e-25	2.78e-22	46.0795	21.5562	up-regulation
SLCO4C1	1.26916	1.86221	5.57607	5e-08	1.43e-06	7.73163	5.84362	up-regulation
LINC01781	1.2705	-5.06755	5.12446	5e-07	8.72e-06	5.95742	5.05954	up-regulation
ZBP1	1.27083	-0.36346	5.94955	6.65e-09	2.82e-07	9.90734	6.55018	up-regulation
IGLC6	1.27125	-4.10516	4.4038	1.42e-05	0.000131	2.83894	3.88164	up-regulation
TNFRSF13C	1.27264	-0.49164	5.76541	1.82e-08	6.5e-07	8.9481	6.18724	up-regulation
CXCL5	1.27418	-2.13059	4.16299	3.98e-05	0.000305	1.78132	3.51639	up-regulation
IGKV1D-43	1.27627	-4.65388	4.1368	4.44e-05	0.000333	1.8119	3.47732	up-regulation
IGKV2D-30	1.27729	-5.31963	4.81318	2.23e-06	2.92e-05	4.57341	4.53455	up-regulation
IGKV3D-7	1.27971	-5.48732	4.97313	1.04e-06	1.59e-05	5.27384	4.79889	up-regulation
FN1	1.28033	12.4515	3.41975	0.000702	0.003159	-1.52619	2.50042	up-regulation
DCSTAMP	1.28168	4.35574	2.55257	0.011127	0.029971	-4.30867	1.5233	up-regulation
FCER2	1.28761	-2.75607	4.33668	1.91e-05	0.000167	2.50784	3.77669	up-regulation
FUT3	1.28957	-0.84859	4.66258	4.48e-06	5.14e-05	3.72369	4.28934	up-regulation
DAPP1	1.29078	0.77362	6.92489	2.17e-11	2.26e-09	15.3638	8.64608	up-regulation
IGLV5-37	1.2929	-4.91827	4.11985	4.76e-05	0.000353	1.75627	3.45243	up-regulation
SLC18A3	1.29329	-3.05149	3.10091	0.002089	0.007724	-1.77806	2.11218	up-regulation
TRBV20-1	1.29454	-1.92957	5.9616	6.22e-09	2.65e-07	10.0541	6.5762	up-regulation
TTC24	1.30666	-3.8585	5.61039	4.17e-08	1.24e-06	8.2797	5.90569	up-regulation
IGHV3-60	1.30924	-4.84315	4.62859	5.23e-06	5.83e-05	3.78238	4.23414	up-regulation
TRAV12-3	1.3116	-4.00569	6.04875	3.82e-09	1.8e-07	10.5281	6.74421	up-regulation
KIF14	1.31204	-0.90483	10.9311	4.66e-24	2.16e-21	43.7835	20.6649	up-regulation
PLA2G2D	1.31521	-0.96437	4.27081	2.53e-05	0.00021	2.1019	3.67754	up-regulation
TRBV9	1.31655	-3.52835	6.03804	4.06e-09	1.88e-07	10.4775	6.72478	up-regulation
IGHV1OR21-1	1.31998	-4.84812	4.59564	6.08e-06	6.58e-05	3.64465	4.18176	up-regulation
TRAV17	1.32179	-4.00925	6.39899	5.14e-10	3.58e-08	12.4215	7.44647	up-regulation
LTA	1.32419	-1.86063	6.7504	6.32e-11	5.9e-09	14.4454	8.2293	up-regulation
CD177	1.32656	-1.16658	3.22233	0.001394	0.005535	-1.59402	2.25687	up-regulation
PNOC	1.32843	-2.54928	4.18318	3.66e-05	0.000284	1.88708	3.54661	up-regulation
RAB27B	1.3292	0.94998	4.47662	1.03e-05	0.000101	2.7377	3.99566	up-regulation
MELK	1.32956	0.335444	12.5573	5.24e-30	8.1e-27	57.3133	26.0914	up-regulation
CTLA4	1.33237	-0.44786	5.74801	2e-08	6.98e-07	8.85281	6.15637	up-regulation
IGHV7-81	1.33308	-4.79957	4.71848	3.47e-06	4.15e-05	4.16163	4.38219	up-regulation
IFNG-AS1	1.33943	-4.48436	5.06362	6.73e-07	1.11e-05	5.67862	4.953	up-regulation
EREG	1.33945	-1.47632	3.81191	0.000163	0.00096	0.407348	3.01751	up-regulation
POLQ	1.3401	-0.74594	13.9138	3.42e-35	3.18e-31	68.7953	30.4978	up-regulation
TOP2A	1.34032	3.29821	13.4031	3.2e-33	1.49e-29	64.6922	28.8278	up-regulation
IGHG4	1.34235	4.25699	2.86433	0.004437	0.014257	-3.47342	1.84597	up-regulation
ICOS	1.34488	-0.96134	5.87666	9.93e-09	3.93e-07	9.55843	6.40546	up-regulation
ASPM	1.35073	0.456268	11.2775	2.69e-25	1.72e-22	46.6861	21.7633	up-regulation
CXCL11	1.35738	0.070615	5.62569	3.85e-08	1.16e-06	8.18206	5.93456	up-regulation
IGLV3-16	1.36423	-4.73138	4.80548	2.31e-06	3.01e-05	4.53467	4.52193	up-regulation
MMP7	1.36557	1.56235	3.74801	0.000209	0.001181	-0.19084	2.92778	up-regulation
IGLV5-48	1.36751	-5.18796	5.25259	2.64e-07	5.35e-06	6.54853	5.27192	up-regulation
BEND4	1.36758	-4.60581	6.4707	3.38e-10	2.5e-08	12.7958	7.60252	up-regulation
ALOX5	1.36992	5.10688	5.03441	7.76e-07	1.25e-05	4.64311	4.9044	up-regulation
CLSPN	1.37211	0.0604	10.8444	9.45e-24	4.08e-21	43.1795	20.3893	up-regulation
CXCR5	1.37568	-4.90526	6.14714	2.2e-09	1.15e-07	11.0246	6.93753	up-regulation
IL12B	1.37831	-4.08283	6.6158	1.43e-10	1.21e-08	13.6332	7.91596	up-regulation
BUB1	1.37913	1.50449	12.7699	8.28e-31	1.92e-27	59.2206	26.7166	up-regulation
IGLV4-3	1.3792	-5.41325	5.70325	2.54e-08	8.44e-07	8.71861	6.07364	up-regulation
TIFAB	1.38234	-2.64931	6.31774	8.26e-10	5.3e-08	11.9924	7.27532	up-regulation
CXCL9	1.39121	3.62536	5.08334	6.12e-07	1.03e-05	5.00611	4.98587	up-regulation
MKI67	1.39165	2.70451	12.6271	2.86e-30	5.31e-27	57.9913	26.275	up-regulation
IGHV7-56	1.39267	-5.30109	5.36724	1.48e-07	3.43e-06	7.08657	5.46448	up-regulation
CXCL10	1.39295	1.80357	6.24446	1.26e-09	7.4e-08	11.2951	7.13103	up-regulation
POU2AF1	1.3969	1.88897	6.30557	8.86e-10	5.61e-08	11.6249	7.25084	up-regulation
CCR4	1.39834	-0.67448	6.33842	7.32e-10	4.77e-08	12.0474	7.32151	up-regulation
GPR174	1.40002	-2.45656	6.13854	2.31e-09	1.2e-07	11.0118	6.92243	up-regulation
ANKRD36BP2	1.40372	-0.50514	4.97831	1.02e-06	1.56e-05	5.09446	4.80794	up-regulation
FAM111B	1.40439	2.17021	9.77859	4.46e-20	1.03e-17	34.8429	16.9853	up-regulation
IGKJ5	1.40504	-5.19143	5.2699	2.42e-07	5e-06	6.62953	5.3014	up-regulation
UBD	1.4096	-1.29331	4.66678	4.4e-06	5.06e-05	3.77405	4.29607	up-regulation
MYBL2	1.43064	1.2173	11.3338	1.69e-25	1.16e-22	47.1717	21.9348	up-regulation
P2RX5	1.43469	-1.86253	6.28413	1e-09	6.16e-08	11.7945	7.21021	up-regulation
IGLV2-28	1.43705	-4.82637	4.98701	9.77e-07	1.51e-05	5.33528	4.8222	up-regulation
COL11A1	1.43823	-0.21368	3.67979	0.000271	0.001462	-0.20073	2.83511	up-regulation
RRM2	1.4385	1.86433	13.3777	4.01e-33	1.49e-29	64.4943	28.8271	up-regulation
C1QL2	1.44869	-1.81277	4.02026	7.15e-05	0.000492	1.20055	3.30828	up-regulation
TNFSF11	1.45291	-1.48008	5.43166	1.06e-07	2.64e-06	7.32207	5.57774	up-regulation
ADAMDEC1	1.45571	-0.55837	5.36701	1.48e-07	3.43e-06	6.93857	5.46448	up-regulation
CHI3L1	1.45576	6.63633	3.68784	0.000263	0.001427	-0.90705	2.84561	up-regulation
SPIB	1.45622	-1.34755	6.08501	3.12e-09	1.54e-07	10.6868	6.81123	up-regulation
IGHV2-70D	1.45792	-3.63795	3.70838	0.000243	0.00134	0.202996	2.87302	up-regulation
FRMD5	1.4587	2.22989	5.84557	1.18e-08	4.5e-07	9.05654	6.34702	up-regulation
IGKV2D-28	1.46105	-5.36549	4.71376	3.54e-06	4.21e-05	4.14731	4.37552	up-regulation
DCC	1.46951	-3.56546	6.68613	9.33e-11	8.29e-09	14.0544	8.08142	up-regulation
IGHV3-63	1.47467	-4.48045	5.12817	4.91e-07	8.6e-06	5.97306	5.06543	up-regulation
IGHV3-52	1.47904	-4.77809	5.19019	3.61e-07	6.79e-06	6.26061	5.16832	up-regulation
CEACAM6	1.48086	1.41844	3.84697	0.000143	0.000859	0.180566	3.06625	up-regulation
LAX1	1.48472	-0.895	6.22293	1.43e-09	8.12e-08	11.4157	7.09062	up-regulation
IGHV3-38	1.49287	-4.61664	4.99589	9.36e-07	1.45e-05	5.37307	4.83801	up-regulation
FUT9	1.49561	-3.45106	4.30831	2.15e-05	0.000184	2.42543	3.73468	up-regulation
IGKV2-29	1.50189	-4.13099	3.80123	0.00017	0.000994	0.553712	3.00254	up-regulation
FCRL4	1.50454	-5.37951	6.71658	7.76e-11	7.06e-09	14.1323	8.15093	up-regulation
IGKV1-13	1.50718	-5.33935	5.67308	2.99e-08	9.53e-07	8.57277	6.02081	up-regulation
SAA2	1.51495	-2.98935	4.72481	3.37e-06	4.06e-05	4.13266	4.39101	up-regulation
TMPRSS11E	1.51649	-1.06425	3.91091	0.000111	0.000703	0.718323	3.15316	up-regulation
TNFRSF17	1.51878	-2.00498	4.67402	4.25e-06	4.92e-05	3.85573	4.30803	up-regulation
IGLV3-12	1.52309	-4.87372	5.41556	1.15e-07	2.83e-06	7.3235	5.54807	up-regulation
IGHV1-12	1.52732	-4.40211	4.60761	5.76e-06	6.32e-05	3.68235	4.19914	up-regulation
IGLV1-41	1.52907	-4.29871	4.10437	5.07e-05	0.000371	1.67034	3.43088	up-regulation
IGHD	1.53441	0.208715	4.10625	5.03e-05	0.000369	1.31962	3.43339	up-regulation
IGHV3-62	1.5515	-5.11433	5.76249	1.85e-08	6.58e-07	9.02731	6.18206	up-regulation
IGHM	1.55619	4.12489	4.17439	3.79e-05	0.000293	0.980015	3.53283	up-regulation
MUC21	1.56498	1.93641	4.15485	4.12e-05	0.000313	1.26038	3.50494	up-regulation
B3GNT3	1.57142	3.67799	4.44052	1.21e-05	0.000115	2.12297	3.94099	up-regulation
CCL19	1.57362	0.402288	4.01179	7.4e-05	0.000505	0.931394	3.29689	up-regulation
P2RY10	1.57483	-1.29413	6.92973	2.1e-11	2.2e-09	15.4928	8.65668	up-regulation
IGKV2D-24	1.57677	-4.772	5.33881	1.71e-07	3.85e-06	6.95792	5.41486	up-regulation
IRF4	1.57772	1.60535	6.9831	1.51e-11	1.6e-09	15.6181	8.7958	up-regulation
MMP12	1.58025	-1.23563	4.98032	1.01e-06	1.54e-05	5.15726	4.81179	up-regulation
IGKV1D-12	1.58186	-4.56278	5.01086	8.7e-07	1.37e-05	5.43937	4.86277	up-regulation
IGHV3OR16-9	1.58675	-4.61334	5.30832	1.99e-07	4.35e-06	6.81366	5.3616	up-regulation
IGHV3-35	1.58768	-4.33739	4.83692	2e-06	2.68e-05	4.66297	4.57244	up-regulation
FCRL3	1.59774	-1.07923	6.7749	5.45e-11	5.13e-09	14.5675	8.28974	up-regulation
FCAMR	1.6001	-4.31079	5.20892	3.29e-07	6.32e-06	6.34513	5.19953	up-regulation
SYT1	1.60718	1.29548	5.87502	1e-08	3.96e-07	9.33779	6.40249	up-regulation
COL19A1	1.6103	-0.78636	5.77078	1.77e-08	6.36e-07	8.98592	6.1963	up-regulation
CR1	1.61157	-1.22171	8.25577	3.32e-15	4.93e-13	23.9591	12.3073	up-regulation
AICDA	1.61437	-4.90807	6.32965	7.7e-10	4.98e-08	12.0123	7.30246	up-regulation
AMPD1	1.62287	-3.66181	4.9861	9.81e-07	1.51e-05	5.31013	4.82102	up-regulation
RGS13	1.62465	-3.53722	6.17159	1.91e-09	1.03e-07	11.1924	6.98791	up-regulation
IGHV5-78	1.63417	-4.60841	5.87903	9.8e-09	3.89e-07	9.63435	6.41018	up-regulation
IGKV1-33	1.63824	-4.89111	5.36049	1.53e-07	3.51e-06	7.06054	5.45488	up-regulation
IGHV3-41	1.64092	-4.72263	5.59118	4.62e-08	1.35e-06	8.18077	5.87125	up-regulation
CD19	1.6422	-1.67333	5.44029	1.01e-07	2.56e-06	7.36952	5.59181	up-regulation
EPYC	1.64383	-4.3354	4.93175	1.27e-06	1.87e-05	5.08117	4.72843	up-regulation
STAP1	1.64531	-2.16404	6.93136	2.08e-11	2.19e-09	15.5127	8.65859	up-regulation
TNFRSF13B	1.64681	-2.93052	5.77296	1.75e-08	6.34e-07	9.09155	6.19823	up-regulation
IGHV1-67	1.64769	-4.38904	5.12556	4.97e-07	8.69e-06	5.95937	5.06107	up-regulation
IGKV6-21	1.65112	-3.17473	4.16294	3.98e-05	0.000305	1.83676	3.51639	up-regulation
IGHV1OR15-9	1.65721	-4.14419	5.04407	7.41e-07	1.21e-05	5.5831	4.91855	up-regulation
IGHV3OR16-8	1.6592	-4.81957	5.53183	6.3e-08	1.75e-06	7.88815	5.75708	up-regulation
IGHV2-70	1.66352	-2.55871	4.18636	3.61e-05	0.000281	1.88773	3.55161	up-regulation
IGKV2D-40	1.66575	-3.63429	4.60013	5.95e-06	6.47e-05	3.62395	4.18891	up-regulation
IGHJ3P	1.68009	-5.07533	6.51452	2.61e-10	2.02e-08	13.0231	7.69555	up-regulation
CR2	1.68738	-0.2971	5.4862	8e-08	2.14e-06	7.49664	5.66962	up-regulation
FCRL2	1.68859	-3.20346	5.21688	3.16e-07	6.12e-06	6.3607	5.21354	up-regulation
IGHV3OR16-17	1.68934	-4.76039	5.72426	2.27e-08	7.7e-07	8.84407	6.11371	up-regulation
PDZK1IP1	1.69585	4.36834	5.64833	3.41e-08	1.05e-06	7.70819	5.97893	up-regulation
IGKV1D-17	1.69842	-4.23875	4.76822	2.75e-06	3.46e-05	4.36038	4.46135	up-regulation
MARCHF11	1.7015	-3.58686	5.26995	2.42e-07	5e-06	6.62094	5.3014	up-regulation
ALPK2	1.70217	-3.10317	6.35157	6.78e-10	4.47e-08	12.1791	7.35011	up-regulation
PSG1	1.70585	-0.9234	5.06777	6.6e-07	1.1e-05	5.53187	4.95883	up-regulation
IGHV2-5	1.71231	-2.78268	4.28079	2.42e-05	0.000203	2.27268	3.6925	up-regulation
IGKV1D-13	1.71837	-3.77507	4.63574	5.07e-06	5.68e-05	3.77864	4.24539	up-regulation
IGHJ2	1.72924	-4.14266	5.33979	1.7e-07	3.84e-06	6.96076	5.41596	up-regulation
FAM30A	1.73023	-2.0709	4.88065	1.62e-06	2.28e-05	4.76032	4.64161	up-regulation
FCRL1	1.73571	-3.39166	6.03615	4.1e-09	1.89e-07	10.4688	6.72338	up-regulation
IGHJ3	1.74195	-3.45899	4.92802	1.3e-06	1.89e-05	5.041	4.72309	up-regulation
IGLV1-51	1.74255	1.72883	4.54179	7.74e-06	8e-05	2.86465	4.09693	up-regulation
IGKV2-28	1.74288	-4.44099	4.55334	7.35e-06	7.7e-05	3.45395	4.11379	up-regulation
TCL1A	1.74346	-3.15476	5.08588	6.04e-07	1.02e-05	5.74782	4.99049	up-regulation
FCRL5	1.76183	-0.93066	4.96004	1.11e-06	1.67e-05	5.03261	4.77651	up-regulation
IGKV1D-42	1.76334	-4.63437	5.69772	2.62e-08	8.59e-07	8.71308	6.06592	up-regulation
IGKV3D-11	1.76406	-2.91361	4.49782	9.41e-06	9.4e-05	3.16018	4.0268	up-regulation
IVL	1.7651	0.062034	4.53949	7.82e-06	8.05e-05	3.08443	4.09439	up-regulation
IGKV1ORY-1	1.76548	-4.5613	5.62389	3.88e-08	1.17e-06	8.34507	5.93324	up-regulation
IGKV1-12	1.76664	-3.47557	4.81548	2.21e-06	2.89e-05	4.54219	4.53863	up-regulation
IGHV3-20	1.76832	-3.64073	5.04283	7.45e-07	1.21e-05	5.565	4.91705	up-regulation
IGHV1-45	1.78893	-3.97549	5.46748	8.82e-08	2.33e-06	7.57517	5.63301	up-regulation
IGHV4-4	1.7931	-3.05003	4.55022	7.45e-06	7.79e-05	3.38529	4.10837	up-regulation
IGHV3-19	1.7995	-4.65312	5.98125	5.57e-09	2.46e-07	10.1653	6.60937	up-regulation
IGLC7	1.81212	-2.17031	4.28195	2.41e-05	0.000202	2.22898	3.69445	up-regulation
IGLV3-10	1.81359	-1.20136	4.35476	1.76e-05	0.000158	2.43951	3.80252	up-regulation
ADCY8	1.81658	0.685181	4.64199	4.92e-06	5.56e-05	3.44763	4.25521	up-regulation
IGHV3-71	1.82622	-4.4056	5.94988	6.63e-09	2.82e-07	10.0069	6.55018	up-regulation
IGLV2-18	1.8277	-2.7029	4.57258	6.74e-06	7.18e-05	3.45837	4.14391	up-regulation
IGKV2-30	1.8378	-3.25923	5.10502	5.5e-07	9.45e-06	5.83819	5.0244	up-regulation
MS4A1	1.84384	0.32655	5.64155	3.53e-08	1.08e-06	8.21687	5.96544	up-regulation
IGHV3-7	1.84502	-3.3058	5.15504	4.3e-07	7.7e-06	6.07177	5.11357	up-regulation
IGKV1D-8	1.84631	-2.94476	5.00001	9.17e-07	1.43e-05	5.34429	4.844	up-regulation
HTR3A	1.84986	-3.0126	6.60986	1.48e-10	1.23e-08	13.633	7.91156	up-regulation
MZB1	1.85292	0.862663	4.9604	1.11e-06	1.67e-05	4.84157	4.77656	up-regulation
IGHG2	1.86346	4.83012	4.09848	5.2e-05	0.000378	0.629759	3.42257	up-regulation
IGHV4-55	1.873	-2.80894	4.99371	9.46e-07	1.46e-05	5.30891	4.83444	up-regulation
IGKV5-2	1.87397	-3.35885	5.91642	7.98e-09	3.3e-07	9.83805	6.48181	up-regulation
IGKV1D-39	1.87597	-4.36374	5.17581	3.88e-07	7.12e-06	6.19008	5.14769	up-regulation
IGHV1-3	1.87706	-3.6519	4.97518	1.03e-06	1.57e-05	5.25687	4.80281	up-regulation
IGLC3	1.87764	2.74517	4.58533	6.36e-06	6.81e-05	2.86759	4.16659	up-regulation
IGHA2	1.87839	3.01088	5.03139	7.88e-07	1.26e-05	4.83151	4.8993	up-regulation
IGLV10-54	1.87923	-2.42792	5.00839	8.81e-07	1.38e-05	5.35572	4.85856	up-regulation
IGHV3-13	1.89591	-2.44486	4.78132	2.59e-06	3.29e-05	4.33839	4.48313	up-regulation
IGHA1	1.90037	6.14201	4.24089	2.87e-05	0.000234	1.18606	3.63132	up-regulation
JCHAIN	1.90511	4.03676	5.29289	2.16e-07	4.6e-06	5.9481	5.33728	up-regulation
IGLV9-49	1.91799	-2.49641	4.63707	5.04e-06	5.66e-05	3.71589	4.24732	up-regulation
IGKV3-7	1.93008	-3.07882	5.21831	3.14e-07	6.09e-06	6.35948	5.21538	up-regulation
IGKV3D-15	1.938	-3.13381	5.00765	8.84e-07	1.39e-05	5.38506	4.85764	up-regulation
PSG8	1.94198	-2.22183	4.5476	7.54e-06	7.86e-05	3.31751	4.10433	up-regulation
IGHV3-72	1.94299	-1.90116	5.03025	7.92e-07	1.26e-05	5.42074	4.89803	up-regulation
IGKV1-6	1.9536	-0.64278	4.45722	1.13e-05	0.000108	2.80242	3.96599	up-regulation
IGHV1-24	1.95416	-1.0263	4.39993	1.45e-05	0.000133	2.60191	3.87626	up-regulation
IGHV6-1	1.95973	-3.72793	5.39718	1.27e-07	3.03e-06	7.22982	5.51796	up-regulation
IGLC2	1.96411	3.58823	4.75784	2.89e-06	3.58e-05	3.49586	4.44624	up-regulation
IGHV5-51	1.97055	0.779738	4.534	8.01e-06	8.21e-05	2.95765	4.08565	up-regulation
FCRLA	1.97066	-2.14539	6.03518	4.13e-09	1.9e-07	10.4404	6.72209	up-regulation
CD79A	1.9747	1.02283	5.75823	1.89e-08	6.68e-07	8.73132	6.17538	up-regulation
IGLV7-43	1.97727	-1.80024	4.80379	2.33e-06	3.03e-05	4.38994	4.51911	up-regulation
IGHV1-69	1.97955	-2.04717	4.53387	8.02e-06	8.21e-05	3.24395	4.08564	up-regulation
IGHV1-58	1.98142	-3.20911	5.38082	1.38e-07	3.24e-06	7.13909	5.48916	up-regulation
IGHV3-73	1.99368	-1.6122	4.78263	2.58e-06	3.27e-05	4.28146	4.48488	up-regulation
IGKV4-1	1.99569	2.31027	4.64524	4.85e-06	5.49e-05	3.19091	4.26058	up-regulation
IGLV1-36	1.99964	-2.95386	5.41942	1.13e-07	2.79e-06	7.31841	5.55382	up-regulation
IGHV3-64	2.00136	-3.1337	5.32259	1.85e-07	4.11e-06	6.856	5.38637	up-regulation
IGLV1-47	2.00169	0.635056	4.63569	5.07e-06	5.68e-05	3.41185	4.24539	up-regulation
IGKV1D-16	2.01355	-3.13847	5.4207	1.12e-07	2.79e-06	7.33016	5.55495	up-regulation
IGLV3-25	2.01801	0.131755	4.87028	1.71e-06	2.38e-05	4.51101	4.62322	up-regulation
IGHG1	2.03004	7.45892	3.61149	0.00035	0.001801	-1.12733	2.74455	up-regulation
IGLV7-46	2.0319	-1.60251	4.92699	1.3e-06	1.9e-05	4.92474	4.72163	up-regulation
IGKV2-24	2.03711	-1.4937	5.23654	2.86e-07	5.69e-06	6.35717	5.24516	up-regulation
IGKV2D-29	2.04295	-2.23018	4.99867	9.23e-07	1.44e-05	5.29394	4.84265	up-regulation
IGKC	2.04771	6.69564	3.91017	0.000111	0.000704	-0.08023	3.15248	up-regulation
IGKV6D-21	2.04836	-4.12149	5.87456	1e-08	3.96e-07	9.62045	6.4023	up-regulation
IGKV3D-20	2.05104	-1.64848	4.93916	1.23e-06	1.82e-05	4.98279	4.74072	up-regulation
IGHV3-66	2.05464	-2.30972	5.02925	7.96e-07	1.27e-05	5.43857	4.89666	up-regulation
SERPINA9	2.05478	-5.11676	7.27793	2.34e-12	2.68e-10	17.4708	9.57217	up-regulation
SLC6A14	2.06002	-0.24181	6.69569	8.81e-11	7.92e-09	14.0495	8.10121	up-regulation
IGHV4-28	2.06373	-2.10486	5.22498	3.03e-07	5.93e-06	6.34071	5.22668	up-regulation
IGHV3-53	2.07678	-1.43308	4.91521	1.38e-06	1.99e-05	4.85718	4.70027	up-regulation
IGLV3-21	2.07994	1.22822	4.62316	5.36e-06	5.95e-05	3.26649	4.22561	up-regulation
IGHV1-69D	2.08278	-0.74648	4.73346	3.24e-06	3.94e-05	3.98885	4.40462	up-regulation
IGKV1-8	2.08734	-2.17072	5.21983	3.11e-07	6.06e-06	6.31919	5.21777	up-regulation
PAX5	2.09005	-2.28077	6.48693	3.07e-10	2.3e-08	12.9304	7.63889	up-regulation
IGKV3-20	2.09154	2.69833	4.75759	2.89e-06	3.58e-05	3.61763	4.44602	up-regulation
IGLV2-8	2.10073	-0.06831	4.77958	2.61e-06	3.3e-05	4.12302	4.48121	up-regulation
IGKV1-16	2.10603	-0.78105	4.8624	1.77e-06	2.44e-05	4.56367	4.6119	up-regulation
IGKV3-11	2.10851	2.76815	4.69574	3.85e-06	4.52e-05	3.33181	4.34503	up-regulation
IGLV5-45	2.12164	-2.36888	5.34862	1.62e-07	3.7e-06	6.94658	5.43178	up-regulation
IGLV6-57	2.12769	-0.16388	4.8939	1.53e-06	2.17e-05	4.64473	4.66295	up-regulation
IGKV1-5	2.12807	2.12464	4.92428	1.32e-06	1.92e-05	4.46016	4.71669	up-regulation
IGHV3-74	2.13569	0.07536	5.20067	3.42e-07	6.51e-06	6.04646	5.18613	up-regulation
IGHV3-33	2.1357	-0.31626	4.85982	1.79e-06	2.47e-05	4.50648	4.60799	up-regulation
IGHV3-43	2.14002	-2.61421	5.70303	2.55e-08	8.44e-07	8.71839	6.07364	up-regulation
IGHV2-26	2.15053	-1.88902	5.13655	4.71e-07	8.3e-06	5.90685	5.08093	up-regulation
IGHV3-30	2.16234	0.504958	4.90038	1.48e-06	2.11e-05	4.59379	4.675	up-regulation
IGKV1-9	2.1649	-0.11336	4.84985	1.88e-06	2.56e-05	4.43862	4.5911	up-regulation
FDCSP	2.16806	-3.77119	4.78442	2.55e-06	3.25e-05	4.40951	4.48792	up-regulation
IGLL5	2.16913	1.94372	5.16256	4.14e-07	7.49e-06	5.60192	5.12563	up-regulation
IGHV3-48	2.17287	-1.66616	5.0761	6.34e-07	1.06e-05	5.60841	4.97363	up-regulation
IGLV8-61	2.17597	-0.91956	4.87947	1.63e-06	2.29e-05	4.64976	4.63951	up-regulation
IGKV3-15	2.18553	0.879555	4.99906	9.21e-07	1.44e-05	4.99488	4.84275	up-regulation
IGHV4-59	2.1946	0.769001	5.03232	7.84e-07	1.26e-05	5.16359	4.9009	up-regulation
IGLV4-60	2.20265	-3.01636	5.14169	4.59e-07	8.15e-06	5.99203	5.08873	up-regulation
IGHV1-46	2.20856	0.031733	5.05594	6.99e-07	1.15e-05	5.3644	4.93904	up-regulation
IGHG3	2.21343	4.48796	5.02532	8.11e-07	1.29e-05	4.63386	4.8895	up-regulation
IGLV3-9	2.218	-1.84463	5.25015	2.67e-07	5.4e-06	6.43944	5.26801	up-regulation
IGLV3-19	2.23183	0.997546	5.08879	5.95e-07	1.01e-05	5.3936	4.99548	up-regulation
IGLV2-11	2.23236	0.64112	4.93637	1.25e-06	1.84e-05	4.73554	4.73613	up-regulation
IGLV1-40	2.23609	1.50688	5.20114	3.42e-07	6.51e-06	5.85097	5.18625	up-regulation
IGHV3-49	2.23798	-0.60989	5.24231	2.78e-07	5.57e-06	6.30884	5.25441	up-regulation
IGLV3-27	2.24923	-2.90429	5.72574	2.25e-08	7.66e-07	8.84173	6.11559	up-regulation
IGKV1-39	2.26462	-3.73939	5.82663	1.31e-08	4.94e-07	9.37322	6.30649	up-regulation
IGHV3-15	2.26728	0.455409	5.22904	2.97e-07	5.86e-06	6.13108	5.23212	up-regulation
IGHV3-23	2.27827	1.71745	5.16243	4.14e-07	7.49e-06	5.62908	5.12563	up-regulation
IGKV1-17	2.29465	-0.41181	5.29793	2.1e-07	4.52e-06	6.55688	5.34484	up-regulation
IGHV3-11	2.30395	-0.12419	5.19158	3.58e-07	6.75e-06	6.01644	5.17088	up-regulation
IGLV1-44	2.31472	0.95015	5.30206	2.06e-07	4.45e-06	6.41592	5.35191	up-regulation
IGKV1-27	2.31774	-0.67277	5.46103	9.12e-08	2.38e-06	7.37939	5.62279	up-regulation
IGHV1-18	2.32363	0.685013	5.19687	3.49e-07	6.61e-06	5.9436	5.17967	up-regulation
IGHV4-61	2.33856	-2.45478	5.47936	8.29e-08	2.21e-06	7.58449	5.65606	up-regulation
IGLV2-14	2.34863	1.73716	5.3742	1.43e-07	3.33e-06	6.6493	5.47719	up-regulation
IGLV4-69	2.35499	-0.55695	5.62355	3.89e-08	1.17e-06	8.1857	5.93316	up-regulation
IGHV4-34	2.35895	0.062996	5.57872	4.93e-08	1.42e-06	7.89877	5.84814	up-regulation
IGLV2-23	2.36976	1.47029	5.38154	1.37e-07	3.24e-06	6.72534	5.48965	up-regulation
IGHV4-30-2	2.41745	-0.89959	5.81654	1.38e-08	5.19e-07	9.20606	6.28449	up-regulation
IGHV3-21	2.44864	0.082469	5.57901	4.92e-08	1.42e-06	7.89373	5.84814	up-regulation
CXCL13	2.46698	-0.38602	6.20848	1.55e-09	8.66e-08	11.2733	7.06263	up-regulation
IGHV1-2	2.52146	-0.2779	5.66774	3.07e-08	9.74e-07	8.38006	6.01141	up-regulation
IGHV4-39	2.77122	0.952241	6.31109	8.58e-10	5.47e-08	11.688	7.26175	up-regulation
