# Supplementary material for: A Prognostic Model of Differentiated Thyroid Cancer Based on Up-Regulated Glycolysis-Related Genes
Source: Front Endocrinol (Lausanne). 2022 Apr 22;13:775278. doi: 10.3389/fendo.2022.775278 (PMC9072639; doi:10.3389/fendo.2022.775278)
Supplement: Supplementary file 16 [file Table_6.xlsx]

## Sheet: Sheet1
Supplemental Table 6. Expression of the four GRGs in Pan-cancer
cancer type	symbol	tumor	normal	fc	pval	fdr
BLCA	ADM	1466.51	1263.88	1.16031	0.704324	0.791511
BLCA	CD44	6647.9	9374.95	0.709116	0.089446	0.206595
BLCA	MKI67	3101.68	722.519	4.29241	2.9e-05	0.000941
BLCA	TYMS	1098.02	447.939	2.45095	0.002029	0.014908
BRCA	ADM	238.955	706.569	0.338284	1.25e-12	7.64e-12
BRCA	CD44	11161	8425.89	1.32461	0.007153	0.01257
BRCA	MKI67	2368.34	288.737	8.19992	1.25e-21	2.63e-20
BRCA	TYMS	696.186	172.566	4.03256	3.45e-13	2.25e-12
ESCA	ADM	624.899	424.862	1.47072	0.49403	0.649766
ESCA	CD44	13216.7	7911.58	1.67054	0.34166	0.522207
ESCA	MKI67	6407.43	1115.3	5.74462	0.000101	0.009652
ESCA	TYMS	1074.5	226.511	4.74203	0.008032	0.073932
HNSC	ADM	3290.84	1709.71	1.92474	0.000535	0.002416
HNSC	CD44	28078.9	15876.1	1.76862	0.000321	0.001581
HNSC	MKI67	4636.34	1899.7	2.44048	1.31e-10	9.11e-09
HNSC	TYMS	827.897	451.168	1.83482	1.19e-05	0.000102
KIRC	ADM	3978.9	681.421	5.83841	1.25e-17	1.79e-16
KIRC	CD44	3842.9	1582.96	2.42757	4.72e-06	1.23e-05
KIRC	MKI67	569.486	111.414	5.10773	2.65e-09	1.07e-08
KIRC	TYMS	862.76	177.143	4.86823	2.04e-24	8.69e-23
KIRP	ADM	912.687	839.729	1.08687	0.785737	0.835666
KIRP	CD44	4502.51	1210.36	3.71976	0.002461	0.007844
KIRP	MKI67	519.61	49.142	10.5542	0.000124	0.000649
KIRP	TYMS	667.978	176.338	3.78647	1.48e-08	3.54e-07
LIHC	ADM	715.492	1238.22	0.577875	0.021022	0.046107
LIHC	CD44	1790	1023.8	1.74832	0.03115	0.064075
LIHC	MKI67	855.877	87.2969	9.79413	3.55e-07	3.51e-06
LIHC	TYMS	698.057	202.327	3.44892	7.77e-07	6.85e-06
LUAD	ADM	479.221	442.792	1.08225	0.714026	0.757916
LUAD	CD44	9120.8	14633.4	0.623289	4.34e-08	2.3e-07
LUAD	MKI67	2010.49	195.624	10.2726	3.22e-11	3.19e-10
LUAD	TYMS	667.144	138.826	4.80286	1.21e-10	1.05e-09
LUSC	ADM	1735.44	638.207	2.71897	3.02e-05	8.03e-05
LUSC	CD44	16308.9	14663.6	1.1122	0.200936	0.253311
LUSC	MKI67	3610.23	246.112	14.6635	4.88e-16	8.5e-15
LUSC	TYMS	1148.26	172.652	6.64743	5.76e-13	5.71e-12
STAD	ADM	289.63	377.69	0.766907	0.256844	0.386874
STAD	CD44	7654.33	7685.49	0.995946	0.976	0.984283
STAD	MKI67	5466.2	1283.99	4.25694	3.39e-09	8.91e-07
STAD	TYMS	968.928	367.632	2.63515	1.37e-05	0.000283
