# Supplementary material for: A Prognostic Model of Differentiated Thyroid Cancer Based on Up-Regulated Glycolysis-Related Genes
Source: Front Endocrinol (Lausanne). 2022 Apr 22;13:775278. doi: 10.3389/fendo.2022.775278 (PMC9072639; doi:10.3389/fendo.2022.775278)
Supplement: Supplementary file 17 [file Table_7.xlsx]

## Sheet: Sheet 1
Supplemental Table 7. KM analysis the association between the four GRGs and RFS in pan-cancer
Cancer	P	HR (95%CI)	Genes
BLCA	0.092	0.45(0.17-1.17)	ADM
BRCA	<0.001	2.05(1.33-3.15)	ADM
ESCA	0.12	0.39(0.11-1.35)	ADM
HNSC	0.12	1.84(0.84-4.02)	ADM
KIRC	0.17	2.73(0.61-12.22)	ADM
KIRP	0.2	0.61(0.29-1.31)	ADM
LIHC	<0.01	1.66(1.19-2.31)	ADM
LUAD	0.059	1.51(0.98-2.31)	ADM
LUSC	0.14	0.67(0.39-1.14)	ADM
STAD	0.41	0.75(0.38-1.5)	ADM
BLCA	0.21	0.63(0.3-1.32)	CD44
BRCA	<0.01	0.53(0.34-0.83)	CD44
ESCA	0.081	2.46(0.86-7)	CD44
HNSC	0.33	1.52(0.65-3.58)	CD44
KIRC	0.093	0.39(0.12-1.22)	CD44
KIRP	0.31	0.65(0.29-1.49)	CD44
LIHC	0.17	0.79(0.57-1.1)	CD44
LUAD	0.23	1.31(0.84-2.03)	CD44
LUSC	0.25	1.34(0.81-2.22)	CD44
STAD	0.11	1.72(0.87-3.38)	CD44
BLCA	0.13	2.05(0.79-5.36)	MKI67
BRCA	0.1	1.56(0.91-2.7)	MKI67
ESCA	<0.05	0.37(0.14-1.02)	MKI67
HNSC	<0.05	3.5(1.05-11.61)	MKI67
KIRC	0.18	2.03(0.71-5.79)	MKI67
KIRP	<0.001	8.24(3.44-19.74)	MKI67
LIHC	<0.001	1.97(1.41-2.77)	MKI67
LUAD	0.062	1.55(0.97-2.46)	MKI67
LUSC	<0.05	1.88(1.11-3.19)	MKI67
STAD	<0.01	0.39(0.2-0.76)	MKI67
BLCA	<0.05	0.48(0.23-0.98)	TYMS
BRCA	0.065	1.52(0.97-2.39)	TYMS
ESCA	0.14	2.05(0.78-5.39)	TYMS
HNSC	0.2	1.88(0.71-4.95)	TYMS
KIRC	0.22	0.52(0.18-1.52)	TYMS
KIRP	<0.05	2.28(1.02-5.08)	TYMS
LIHC	<0.001	1.73(1.25-2.41)	TYMS
LUAD	0.1	1.45(0.93-2.27)	TYMS
LUSC	<0.05	1.87(1.12-3.13)	TYMS
STAD	<0.05	0.47(0.25-0.9)	TYMS
KM, Kaplan-Meier; BLCA,
